# Supplementary material for: Genome-Wide Analysis of the MADS-Box Gene Family in Holoparasitic Plants (Balanophora subcupularis and Balanophora fungosa var. globosa)
Source: Front Plant Sci. 2022 May 31;13:846697. doi: 10.3389/fpls.2022.846697 (PMC9197559; doi:10.3389/fpls.2022.846697)
Supplement: Supplementary file 2 [file Data_Sheet_2.xlsx]

## Sheet: Table S1
Table S1 Data on all species used in our analysis
Order	Species	Sources
Brassicales	Arabidopsis thaliana	Phytozome	https://phytozome-next.jgi.doe.gov/info/Athaliana_TAIR10
Vitales	Vitis Vinifera	Phytozome	https://phytozome-next.jgi.doe.gov/info/Vvinifera_v2_1
Lamiales	Mimulus Guttatus	Phytozome	https://phytozome-next.jgi.doe.gov/info/Mguttatus_v2_0
	Striga asiatica	NCBI	https://www.ncbi.nlm.nih.gov/genome/?term=Striga+asiatica
Solanales	Ipomoea nil	Phytozome	https://datadryad.org/stash/dataset/doi:10.5061/dryad.53t3574
	Cuscuta australis	Phytozome	http://viewer.shigen.info/asagao/data/Asagao_1.1.fa.gz
Malpighiales	Populus Trichocarpa	Phytozome	http://groups.english.kib.cas.cn/epb/dgd/
	Sapria himalayana	NCBI	https://www.ncbi.nlm.nih.gov/genome/?term=Sapria+himalayana
Santalales	Scurrula parasitica	this work
	Santalum album	NCBI	https://www.ncbi.nlm.nih.gov/genome/?term=Santalum+album
	Malania oleifera	GigaDB	http://gigadb.org/dataset/100549
	Balanophora fungosa	oneKP	https://db.cngb.org/onekp/search/
	Balanophora subcupularis	this work
	Balanophora fungosa var. globosa	this work
Autotrophic
Hemiparasites
Holoparasites

## Sheet: Table S2
Table S2 List of 48 MADS-box genes identified in B. subcupularis and B. fungosa var. globosa (aa, amino acids)
	Name	Gene ID	Intron	Length (aa)	Group	Predicted gene type
B. subcupularis	BsubMADS1	BAL03748	0	165	Type I	Mβ
	BsubMADS2	BAL04788	0	300	Type I	Mβ
	BsubMADS3	BAL12618	3	465	Type I	Mβ
	BsubMADS4	BAL00801	0	215	Type I	Mα
	BsubMADS5	BAL09431	0	204	Type I	Mα
	BsubMADS6	BAL14055	0	214	Type I	Mα
	BsubMADS7	BAL10128	1	199	Type I	Mα
	BsubMADS8	BAL08472	0	217	Type I	Mα
	BsubMADS9	BAL06931	0	251	Type I	Mγ
	BsubMADS10	BAL13946	0	246	Type I	Mγ
	BsubMADS11	BAL00293	0	71	Type II	MIKC*
	BsubMADS12	BAL14693	8	341	Type II	MIKC*
	BsubMADS13	BAL11767	0	68	Type II	MIKC*
	BsubMADS14	BAL09636	1	132	Type II	SEP
	BsubMADS15	BAL05511	5	183	Type II	FLC
	BsubMADS16	BAL14232	2	107	Type II	AG
	BsubMADS17	BAL07420	2	167	Type II	AP3/PI
	BsubMADS18	BAL08624	6	220	Type II	AP3/PI
	BsubMADS19	BAL12768	6	209	Type II	AP3/PI
	BsubMADS20	BAL09197	6	238	Type II	SVP
	BsubMADS21	BAL03787	6	242	Type II	AG
	BsubMADS22	BAL09239	6	218	Type II	SOC1
	BsubMADS23	BAL05482	7	243	Type II	SEP
	BsubMADS24	BAL14694	7	243	Type II	SEP
	BsubMADS25	BAL06272	7	247	Type II	AP1/FUL
B. globosa	BgloMADS1	BALA07964	0	295	Type I	Mβ
	BgloMADS2	BALA03019	0	156	Type I	Mβ
	BgloMADS3	BALA09715	0	247	Type I	Mγ
	BgloMADS4	BALA14685	0	182	Type I	Mγ
	BgloMADS5	BALA15069	1	219	Type I	Mα
	BgloMADS6	BALA12135	0	243	Type I	Mα
	BgloMADS7	BALA15066	0	173	Type I	Mα
	BgloMADS8	BALA08334	0	207	Type I	Mα
	BgloMADS9	BALA15067	4	264	Type II	MIKC*
	BgloMADS10	BALA15068	6	325	Type II	MIKC*
	BgloMADS11	BALA02824	5	240	Type II	MIKC*
	BgloMADS12	BALA05212	4	197	Type II	FLC
	BgloMADS13	BALA15065	7	209	Type II	MIKC*
	BgloMADS14	BALA11106	3	178	Type II	AP3/PI
	BgloMADS15	BALA15015	6	209	Type II	AP3/PI
	BgloMADS16	BALA06660	7	257	Type II	AP3/PI
	BgloMADS17	BALA14287	3	286	Type II	SVP
	BgloMADS18	BALA12847	3	151	Type II	AG
	BgloMADS19	BALA13603	6	244	Type II	AG
	BgloMADS20	BALA01532	6	217	Type II	SOC1
	BgloMADS21	BALA05173	8	259	Type II	SEP
	BgloMADS22	BALA15070	7	248	Type II	SEP
	BgloMADS23	BALA06721	6	243	Type II	AP1/FUL
* In bold are the non-K domain genes that cluster into type II

## Sheet: Table S3
Table S3 Classification of 14 species based on phylogenetic relationships
Arabidopsis thaliana	Vitis vinifera	Ipomoea nil	Populus trichocarpa	Mimulus guttatus	Striga asiatica	Scurrula parasitica	Santalum album	Malania oleifera	Cuscuta australis	Sapria himalayana	Balanophora fungosa var. globosa	Balanophora subcupularis	Balanophora fungosa
AT1G31630.1_AGL86	VIT_214s0060g00300.1	INIL06g37292.t1	Potri.005G002400.1	Migut.B01455.1.p	SGA_v2.0_scaffold5T03072	SPA00425	SaT00743-R1	Maole_011635.T1	C011N0393M0.1	SHI07318-RA	BgloMADS3	BsubMADS10	STKY6327			MADS	M-type	MIKC
AT1G33070.1_AGL108	VIT_202s0109g00382.1	INIL15g27814.t1	Potri.013G001700.1	Migut.B00884.1.p	SGA_v2.0_scaffold98T29415	SPA00519	SaT21406-R1	Maole_013909.T1	C011N0418G0.1	SHI07325-RA	BgloMADS4	BsubMADS9	STKY6328		Balanophora fungosa var. globosa	23	8	15
AT1G31640.1_AGL92	VIT_202s0109g00384.1	INIL15g27816.t1	Potri.013G018100.1	Migut.C01325.1.p	SGA_v2.0_scaffold5T03073	SPA06542	SaT16593-R1	Maole_013914.T1	C016N0183E0.1	SHI28290-RA	BgloMADS2	BsubMADS1	STKY70836		Balanophora subcupularis	25	10	15
AT5G26580.1_AGL34	VIT_205s0020g01043.1	INIL15g27817.t1	Potri.013G107600.1	Migut.B01615.1.p	SGA_v2.0_scaffold144T35870	SPA21775	SaT04996-R1	Maole_013908.T1	C014N0079E0.1	SHI00087-RA	BgloMADS1	BsubMADS2	STKY10412		Balanophora fungosa	19	4	15
AT5G26650.1_AGL36	VIT_205s0020g01046.1	INIL15g39087.t1	Potri.006G201700.1	Migut.B01089.1.p	SGA_v2.0_scaffold279T46786	SPA26088	SaT04997-R1	Maole_013912.T1	C011N0562M0.1	SHI00086-RA	BgloMADS7	BsubMADS3	STKY6560		Sapria himalayana	25	11	14
AT5G27960.1_AGL90	VIT_205s0020g01055.1	INIL15g39088.t1	Potri.016G068100.1	Migut.L00642.1.p	SGA_v2.0_scaffold4T01869	SPA01410	SaT13424-R1	Maole_013907.T1	C026N0449M0.1	SHI08685-RA	BgloMADS8	BsubMADS4	STKY6561		Cuscuta australis	33	19	14
AT1G65300.1_AGL38	VIT_208s0032g00974.1	INIL15g39089.t1	Potri.001G214900.1	Migut.L00835.1.p	SGA_v2.0_scaffold153T36988	SPA01411	SaT05668-R1	Maole_013911.T1	C072N0033E0.1	SHI00129-RA	BgloMADS6	BsubMADS5	STKY6562		Malania oleifera	64	41	23
AT1G65330.1_PHE1	VIT_215s0021g02220.1	INIL12g01160.t1	Potri.001G329800.1	Migut.L00643.1.p	SGA_v2.0_scaffold41T15855	SPA08193	SaT09157-R1	Maole_013913.T1	C009N0309M0.1	SHI22608-RA	BgloMADS5	BsubMADS6	STKY77699		Santalum album	63	22	41
AT5G26630.1_AGL35	VIT_215s0021g02250.1	INIL03g14975.t1	Potri.002G255700.1	Migut.L00834.1.p	SGA_v2.0_scaffold511T52625	SPA23279	SaT05699-R1	Maole_020459.T1	C014N0383E0.1	SHI33749-RA	BgloMADS13	BsubMADS8	STKY9026		Scurrula parasitica	45	21	24
AT2G28700.1_AGL46	VIT_205s0049g01465.1	INIL07g06020.t1	Potri.012G109900.1	Migut.L01896.1.p	SGA_v2.0_scaffold304T47921	SPA25348	SaT02641-R1	Maole_005358.T1	C052N0065E0.1	SHI05162-RA	BgloMADS11	BsubMADS7	STKY75111		Striga asiatica	51	26	25
AT3G05860.1_AGL45	VIT_215s0048g00485.1	INIL07g06021.t1	Potri.010G098100.1	Migut.N00831.1.p	SGA_v2.0_scaffold58T20582	SPA04964	SaT10288-R1	Maole_011596.T1	C006N0580E0.1	SHI42934-RA	BgloMADS10	BsubMADS11	STKY4986		Vitis vinifera	81	32	49
AT5G27810.1_AGL106	VIT_215s0048g00495.1	INIL07g06027.t1	Potri.008G020300.1	Migut.N00838.1.p	SGA_v2.0_scaffold157T37317	SPA05017	SaT05713-R1	Maole_022474.T1	C006N0581E0.1	SHI11612-RA	BgloMADS9	BsubMADS13	STKY4987		Ipomoea nil	93	52	41
AT5G48670.1_AGL80	VIT_217s0000g07135.1	INIL04g02386.t1	Potri.010G238900.1	Migut.B00770.1.p	SGA_v2.0_scaffold30T12416	SPA05965	SaT15483-R1	Maole_020131.T1	C006N0120E0.1	SHI09696-RA	BgloMADS16	BsubMADS12	STKY75780		Mimulus guttatus	95	42	53
AT1G22590.2_AGL87	VIT_217s0000g08445.1	INIL04g02392.t1	Potri.010G181300.1	Migut.N01290.1.p	SGA_v2.0_scaffold337T49184	SPA25613	SaT15374-R1	Maole_007992.T1	C022N0293E0.1	SHI06116-RA	BgloMADS14	BsubMADS17	STKY9830		Populus trichocarpa	102	39	63
AT2G40210.1_AGL48	VIT_215s0021g00560.1	INIL05g02142.t1	Potri.004G222200.1	Migut.G00091.1.p	SGA_v2.0_scaffold104T30212	SPA07851	SaT17710-R1	Maole_022994.T1	C002N0575E0.1	SHI08588-RA	BgloMADS15	BsubMADS18	STKY9690		Arabidopsis thaliana	108	62	46
AT5G06500.1_AGL96	VIT_200s1450g00005.1	INIL13g09292.t1	Potri.015G077800.1	Migut.G01095.1.p	SGA_v2.0_scaffold144T35855	SPA25616	SaT11919-R1	Maole_011296.T1	C028N0110M0.1	SHI09220-RA	BgloMADS17	BsubMADS19	STKY76815			Type I
AT1G59810.1_AGL50	VIT_207s0005g06590.1	INIL06g37567.t1	Potri.016G118900.1	Migut.B00482.1.p	SGA_v2.0_scaffold32T12977	SPA26201	SaT18794-R1	Maole_023002.T1	C006N0111M0.1	SHI31069-RA	BgloMADS21	BsubMADS20	STKY75913			Type II
AT1G60040.1_AGL49	VIT_210s0003g03970.1	INIL01g15941.t1	Potri.016G119000.1	Migut.N01120.1.p	SGA_v2.0_scaffold519T52685	SPA19823	SaT20735-R1	Maole_018799.T1	C007N0451M0.1	SHI21805-RA	BgloMADS22	BsubMADS23	STKY1198
AT3G18650.1_AGL103	VIT_210s0003g03025.1	INIL01g15946.t1	Potri.017G039800.1	Migut.D01311.1.p	SGA_v2.0_scaffold32T12976	SPA18672	SaT05930-R1	Maole_022684.T1	C102N0054E0.1	SHI20564-RA	BgloMADS23	BsubMADS14	STKY1199
AT4G02235.1_AGL51	VIT_203s0088g00590.1	INIL08g38549.t1	Potri.017G040700.1	Migut.D01314.1.p	SGA_v2.0_scaffold5006T54578	SPA17941	Ab_initio_SaG03765	Maole_003228.T1	C014N0030M0.1	SHI20556-RA	BgloMADS12	BsubMADS24
AT4G11250.1_AGL52	VIT_203s0088g00610.1	INIL01g05020.t1	Potri.T101400.1	Migut.D01313.1.p	SGA_v2.0_scaffold342T49433	SPA19940	Ab_initio_SaG06022	Maole_003229.T1	C008N0131E0.1	SHI06656-RA	BgloMADS20	BsubMADS25
AT5G65330.1_AGL78	VIT_201s0010g01500.1	INIL01g19676.t1	Potri.017G040600.1	Migut.D01315.1.p	SGA_v2.0_scaffold172T38970	SPA11510	Ab_initio_SaG12132	Maole_003230.T1	C009N0448E0.1	SHI17451-RA	BgloMADS18	BsubMADS15
AT5G37415.1_AGL105	VIT_203s0088g00600.1	INIL01g19678.t1	Potri.T101600.1	Migut.D01317.1.p	SGA_v2.0_scaffold14T07116	SPA11511	SaT07546-R1	Maole_004019.T1	C004N0076E0.1	SHI06664-RA	BgloMADS19	BsubMADS22
AT5G39750.1_AGL81	VIT_203s0088g00510.1	INIL14g03750.t1	Potri.004G002400.1	Migut.D01316.1.p	SGA_v2.0_scaffold27T11644	SPA08961	SaT15598-R1	Maole_010158.T1	C004N0461E0.1	SHI08996-RA		BsubMADS21
AT5G39810.1_AGL98	VIT_203s0088g00550.1	INIL02g10677.t1	Potri.008G041500.1	Migut.H00739.1.p	SGA_v2.0_scaffold111T31438	SPA10181	SaT14802-R1	Maole_014296.T1	C041N0257E0.1	SHI01397-RA		BsubMADS16
AT5G38740.1_AGL77	VIT_201s0010g01530.1	INIL02g10678.t1	Potri.009G084100.1	Migut.D01312.1.p	SGA_v2.0_scaffold1T00154	SPA07567	SaT01121-R1	Maole_011648.T1	C074N0099E0.1
AT5G40120.1_AGL76	VIT_200s0386g00010.1	INIL14g06731.t1	Potri.007G113800.1	Migut.M00928.1.p	SGA_v2.0_scaffold51T18728	SPA11810	SaT07474-R1	Maole_011651.T1	C004N0075E0.1
AT5G40220.1_AGL43	VIT_210s0003g03015.1	INIL14g06732.t1	Potri.007G114000.1	Migut.E01244.1.p	SGA_v2.0_scaffold26T11297	SPA00890	SaT21037-R1	Maole_011669.T1	C024N0015E0.1
AT5G41200.1_AGL75	VIT_210s0003g03020.1	INIL14g06733.t1	Potri.017G047300.1	Migut.B00480.1.p	SGA_v2.0_scaffold25T10919	SPA09480	SaT15620-R1	Maole_011657.T1	C074N0098E0.1
AT5G26880.1_AGL26	VIT_200s0250g00085.1	INIL14g06735.t1	Potri.009G084200.1	Migut.N01504.1.p	SGA_v2.0_scaffold56T19998	SPA00493	SaT05533-R1	Maole_011663.T1	C067N0023E0.1
AT5G27050.1_AGL101	VIT_213s0019g05285.1	INIL14g06734.t1	Potri.004G130900.1	Migut.B00479.1.p	SGA_v2.0_scaffold2T01324	SPA13643	SaT21728-R1	Maole_012783.T1	C003N0164E0.1
AT5G27580.1_AGL89	VIT_213s0074g00182.1	INIL14g06737.t1	Potri.001G251400.1	Migut.B00481.1.p	SGA_v2.0_scaffold162T37923	SPA14886	SaT12251-R1	Maole_011666.T1	C117N0013E0.1
AT5G26950.1_AGL93	VIT_207s0031g01140.1	INIL14g21273.t1	Potri.009G045900.1	Migut.F01550.1.p	SGA_v2.0_scaffold201T41318	SPA05335	SaT20456-R1	Maole_011653.T1	C013N0366E0.1
AT5G27070.1_AGL53	VIT_218s0001g04810.1	INIL14g21275.t1	Potri.004G131100.1	Migut.B00708.1.p	SGA_v2.0_scaffold52T18923	SPA14081	SaT09021-R1	Maole_011662.T1
AT5G27090.1_AGL54	VIT_218s0001g09540.1	INIL14g21281.t1	Potri.002G062000.1	Migut.D01476.1.p	SGA_v2.0_scaffold45T17235	SPA06990	SaT00518-R1	Maole_011660.T1
AT5G27944.1_AGL107	VIT_207s0129g00650.1	INIL14g21282.t1	Potri.004G010200.1	Migut.A00406.1.p	SGA_v2.0_scaffold83T26372	SPA03627	SaT19250-R1	Maole_002762.T1
AT5G55690.1_AGL47	VIT_204s0008g01980.1	INIL14g21274.t1	Potri.006G258500.1	Migut.A00408.1.p	SGA_v2.0_scaffold69T23122	SPA20109	SaT08982-R1	Maole_012906.T1
AT5G58890.1_AGL82	VIT_217s0000g06340.2	INIL03g11422.t1	Potri.012G110100.1	Migut.K00930.1.p	SGA_v2.0_scaffold37T14631	SPA00796	SaT11447-R1	Maole_019614.T1
AT1G17310.1_AGL100	VIT_212s0059g02675.1	INIL03g11424.t1	Potri.017G124000.1	Migut.J01317.1.p	SGA_v2.0_scaffold391T50619	SPA22223	SaT14887-R1	Maole_014257.T1
AT1G72350.1_AGL60	VIT_219s0014g00310.1	INIL03g11425.t1	Potri.007G087500.1	Migut.D02159.1.p	SGA_v2.0_scaffold153T37049	SPA24931	SaT05729-R1	Maole_014256.T1
AT1G01530.1_AGL28	VIT_218s0001g13460.1	INIL03g11426.t1	Potri.002G092300.1	Migut.O00574.1.p	SGA_v2.0_scaffold11T05622	SPA17749	SaT03146-R1	Maole_014255.T1
AT1G65360.1_AGL23	VIT_204s0023g02820.1	INIL03g11427.t1	Potri.005G169600.1	Migut.I00404.1.p	SGA_v2.0_scaffold287T47181	SPA17746	SaT17741-R1	Maole_021418.T1
AT4G36590.1_AGL40	VIT_218s0001g01760.1	INIL03g11428.t1	Potri.007G050400.1	Migut.H02390.1.p	SGA_v2.0_scaffold148T36443	SPA22508	SaT12063-R1	Maole_006673.T1
AT5G60440.1_AGL62	VIT_210s0042g00820.1	INIL03g11430.t1	Potri.018G048000.1	Migut.C00517.1.p	SGA_v2.0_scaffold153T37050	SPA13915	SaT20376-R1	Maole_006674.T1
AT2G24840.1_AGL61	VIT_201s0011g01560.1	INIL03g11434.t1	Potri.008G088200.1	Migut.I00190.1.p	SGA_v2.0_scaffold146T36210	SPA26176	SaT15365-R1	Maole_015825.T1
AT1G28450.1_AGL58	VIT_202s0025g02350.1	INIL03g11432.t1	Potri.010G167300.1	Migut.H01211.1.p	SGA_v2.0_scaffold10T05408		SaT16856-R1	Maole_007852.T1
AT1G28460.1_AGL59	VIT_200s0313g00070.1	INIL13g10970.t1	Potri.007G120000.1	Migut.K01032.1.p	SGA_v2.0_scaffold221T42746		SaT22213-R1	Maole_019679.T1
AT1G54760.1_AGL85	VIT_218s0001g07460.2	INIL15g27657.t1	Potri.002G028400.1	Migut.H02389.1.p	SGA_v2.0_scaffold2T01094		SaT14888-R1	Maole_000815.T1
AT1G29962.1_AGL64	VIT_215s0107g00120.1	INIL09g31419.t1	Potri.005G118000.1	Migut.L00101.1.p	SGA_v2.0_scaffold118T32576		SaT22061-R1	Maole_009058.T1
AT3G04100.1_AGL57	VIT_200s0729g00010.1	INIL03g17314.t1	Potri.007G017000.1	Migut.C00785.1.p	SGA_v2.0_scaffold118T32570		SaT22058-R1	Maole_022546.T1
AT1G47760.1_AGL102	VIT_215s0024g02000.1	INIL03g17580.t1	Potri.002G079000.1	Migut.N03130.1.p	SGA_v2.0_scaffold24T10612		SaT05727-R1	Maole_020928.T1
AT2G34440.1_AGL29	VIT_203s0167g00100.1	INIL03g17583.t1	Potri.005G182200.1	Migut.A00326.1.p			SaT17323-R1	Maole_021062.T1
AT3G66656.1_AGL91	VIT_203s0017g00360.1	INIL01g25374.t1	Potri.005G091100.1	Migut.C01064.1.p			SaT20374-R1	Maole_022550.T1
AT1G46408.1_AGL97	VIT_203s0017g00440.1	INIL14g35101.t1	Potri.007G073000.1	Migut.A00649.1.p			SaT14429-R1	Maole_013767.T1
AT5G04640.1_AGL99	VIT_203s0017g00450.1	INIL01g36557.t1	Potri.012G125600.1	Migut.A00653.1.p			SaT23840-R1	Maole_023364.T1
AT5G38620.1_AGL73	VIT_215s0024g01860.1	INIL14g41853.t1	Potri.015G125500.1	Migut.A00654.1.p			SaT14431-R1	Maole_020927.T1
AT5G49420.1_AGL84	VIT_213s0158g00100.2	INIL02g11869.t1	Potri.007G010800.1	Migut.H02293.1.p			SaT22488-R1	Maole_021057.T1
AT5G49490.1_AGL83	VIT_208s0007g08790.1	INIL05g09362.t1	Potri.002G105600.1	Migut.H02298.1.p			SaT14430-R1	Maole_018664.T1
AT1G60880.1_AGL56	VIT_203s0097g00160.2	INIL01g25289.t1	Potri.005G155300.1	Migut.B00557.1.p			SaT19783-R1	Maole_016726.T1
AT1G60920.1_AGL55	VIT_200s0211g00180.1	INIL15g28129.t1	Potri.005G155700.1	Migut.N01802.1.p			SaT00720-R1	Maole_018951.T1
AT1G48150.1_AGL74	VIT_200s0211g00150.1	INIL06g38202.t1	Potri.007G115000.1	Migut.H00286.1.p			SaT09994-R1	Maole_009352.T1
AT5G27130.1_AGL39	VIT_218s0001g07900.3	INIL06g38203.t1	Potri.007G115100.1	Migut.N02839.1.p			SaT16647-R1	Maole_010117.T1
AT1G22130.1_AGL104	VIT_217s0000g01230.6	INIL14g03781.t1	Potri.007G115200.1	Migut.N01110.1.p			SaT19272-R1	Maole_005004.T1
AT1G77980.1_AGL66	VIT_214s0083g01050.2	INIL12g01106.t1	Potri.017G044200.1	Migut.B00527.1.p				Maole_005006.T1
AT1G77950.1_AGL67	VIT_201s0011g00110.1	INIL04g02328.t1	Potri.017G044500.1	Migut.D01274.1.p
AT2G26320.1_AGL33	VIT_217s0000g05000.1	INIL14g35204.t1	Potri.009G055700.1	Migut.K00969.5.p
AT1G18750.1_AGL65	VIT_201s0010g03900.4	INIL02g40649.t1	Potri.006G048700.1	Migut.B01667.1.p
AT1G69540.1_AGL94	VIT_215s0048g01270.1	INIL11g26630.t1	Potri.002G109700.1	Migut.N01413.1.p
AT2G03060.2_AGL30	VIT_216s0022g02330.1	INIL14g41600.t1	Potri.005G150700.1	Migut.E00037.1.p
AT3G54340.1_AP3	VIT_201s0011g00100.1	INIL04g34972.t1	Potri.001G284300.1	Migut.D01622.1.p
AT5G20240.1_PI	VIT_217s0000g04990.1	INIL14g03769.t1	Potri.012G100200.2	Migut.H00589.1.p
AT1G31140.2_GOA	VIT_214s0083g01030.1	INIL09g33285.t1	Potri.015G098400.1	Migut.G00778.1.p
AT5G23260.2_AGL32	VIT_201s0010g03896.1	INIL13g08257.t1	Potri.004G115500.1	Migut.I00364.1.p
AT2G22540.1_SVP	VIT_214s0068g01800.1	INIL01g25143.t1	Potri.017G099700.1	Migut.K00984.1.p
AT4G24540.1_AGL24	VIT_215s0048g01240.1	INIL03g22474.t1	Potri.008G098400.1	Migut.K00965.1.p
AT3G57390.1_AGL18	VIT_202s0025g04650.1	INIL13g07818.t1	Potri.001G058400.1	Migut.K00994.1.p
AT5G13790.1_AGL15	VIT_216s0022g02400.4	INIL11g22433.t1	Potri.003G169600.1	Migut.K00964.1.p
AT2G14210.1_AGL44	VIT_218s0041g02140.1	INIL09g30017.t1	Potri.014G074100.1	Migut.K00963.1.p
AT2G22630.1_AGL17	VIT_218s0041g01880.1	INIL08g23204.t1	Potri.012G132600.1	Migut.K00996.1.p
AT4G37940.1_AGL21	VIT_210s0003g02070.2	INIL13g08258.t1	Potri.015G134800.1	Migut.K00968.1.p
AT3G57230.1_AGL16	VIT_212s0142g00360.1	INIL09g35955.t1	Potri.008G098500.1	Migut.K00957.1.p
AT3G02310.1_SEP2		INIL03g22473.t1	Potri.010G154100.1	Migut.K00958.1.p
AT5G15800.2_SEP1		INIL02g11715.t1	Potri.012G062300.1	Migut.K00960.1.p
AT2G03710.1_SEP4		INIL11g22431.t1	Potri.004G115400.1	Migut.K01001.1.p
AT1G24260.2_SEP3		INIL09g30018.t1	Potri.017G099800.1	Migut.K00961.2.p
AT2G45650.1_AGL6		INIL12g01448.t1	Potri.001G058200.1	Migut.B01668.1.p
AT3G61120.1_AGL13		INIL02g17189.t1	Potri.003G169800.1	Migut.A00897.1.p
AT1G26310.1_CAL		INIL15g27555.t1	Potri.003G170200.1	Migut.O00478.1.p
AT1G69120.1_AP1		INIL12g24881.t1	Potri.003G169700.1	Migut.F00397.1.p
AT5G60910.1_AGL8		INIL08g04824.t1	Potri.003G170000.1	Migut.F01157.1.p
AT3G30260.1_AGL79		INIL08g04815.t1	Potri.001G328400.1	Migut.A00904.1.p
AT1G77080.4_MAF1		INIL03g17609.t1	Potri.002G151700.4	Migut.C01339.1.p
AT5G65050.3_AGL31		INIL06g37823.t1	Potri.014G074200.1	Migut.C01334.1.p
AT5G65060.1_MAF3			Potri.001G112400.1	Migut.H01397.1.p
AT5G65070.3_MAF4			Potri.003G119700.2	Migut.M00986.3.p
AT5G65080.1_MAF5			Potri.012G133000.1
AT5G10140.1_FLC			Potri.013G102600.1
AT2G45660.1_AGL20			Potri.019G076800.1
AT4G11880.1_AGL14			Potri.013G104900.1
AT4G22950.1_AGL19			Potri.019G077200.1
AT5G51860.1_AGL72			Potri.004G064300.1
AT5G51870.3_AGL71			Potri.011G075800.1
AT5G62165.1_AGL42
AT1G71692.1_AGL12
AT4G09960.3_STK
AT4G18960.1_AG
AT2G42830.2_SHP2
AT3G58780.3_SHP

## Sheet: Table S4
Table S4 MADS-box clades preserved in Balanophora and S. himalayana in the MRCA of extant angiosperms
clades	A. thaliana	V. vinifera	P. trichocarpa	B. subcupularis	B. fungosa var. globosa	S. himalayana
AP3	1	1	1	1	1	0
PI	1	1	2	1	1	1
GGM13	1	1	2	0	0	1
STMADS11 (SVP)	2	10	9	1	1	3
TM3 (SOC1)	6	3	5	1	1	0
FLC	6	2	6	1	1	1
AG	3	2	4	2	1	1
AGL12	1	1	2	0	0	0
AGL2 (SEP1/2/4)	3	2	3	1	1	2
AGL6	2	2	3	0	0	0
AP1	4	4	7	1	1	1
ANR1 (AGL17)	4	4	3	0	0	0
AGL15	2	2	2	0	0	0
MIKC*-P	4	2	3	1	3	1
MIKC*-S	3	3	3	2	1	2
STK	1	1	2	0	0	1
AGL9 (SEP3)	1	1	2	1	1	0
Mα	24	17	23	5	4	3
Mβ	22	8	10	3	2	5
Mγ	16	7	6	2	2	3

## Sheet: Table S5
Table S5 Number of MADS-box gene introns in 12 species based on annotation information
			M		MIKC
BsubMADS1	0	BsubMADS11	0	BgloMADS1	0	BgloMADS9	4	AT5G40220.1	0	AT3G58780.3	8	C006N0111M0.1	0	C074N0099E0.1	7	INIL15g27816.t1	1	INIL14g35101.t1	6	Migut.N00831.1.p	0	Migut.H02389.1.p	1	Potri.010G181300.1	0	Potri.008G098400.1	7	SaT11919-R1	0	SaT22213-R1	2	SGA_v2.0_scaffold519T52685	0	SGA_v2.0_scaffold162T37923	6	SHI08685-RA	2	SHI20556-RA	7	SPA05965	0	SPA03627	4	VIT_217s0000g07135.1	0	VIT_201s0011g01560.1	4
BsubMADS2	0	BsubMADS12	8	BgloMADS2	0	BgloMADS10	6	AT5G26580.1	0	AT3G54340.1	6	C006N0580E0.1	0	C009N0448E0.1	7	INIL06g37567.t1	1	INIL05g09362.t1	6	Migut.B01455.1.p	0	Migut.N01110.1.p	6	Potri.016G068100.1	0	Potri.007G115200.1	6	SaT20735-R1	1	SaT17323-R1	5	SGA_v2.0_scaffold153T36988	0	SGA_v2.0_scaffold201T41318	6	SHI00129-RA	1	SHI17451-RA	7	SPA01411	0	SPA08961	6	VIT_203s0088g00590.1	0	VIT_213s0158g00100.2	7
BsubMADS3	3	BsubMADS13	0	BgloMADS3	0	BgloMADS11	5	AT3G05860.1	2	AT1G77080.4	6	C102N0054E0.1	0	C024N0015E0.1	7	INIL03g11428.t1	0	INIL01g25289.t1	7	Migut.E01244.1.p	0	Migut.A00897.1.p	6	Potri.009G045900.1	0	Potri.014G074200.1	7	SaT13424-R1	0	SaT22061-R1	1	SGA_v2.0_scaffold279T46786	0	SGA_v2.0_scaffold118T32576	21	SHI00087-RA	1	SHI21805-RA	3	SPA19940	3	SPA26176	1	VIT_201s0010g01530.1	1	VIT_203s0017g00360.1	0
BsubMADS4	0	BsubMADS14	1	BgloMADS4	0	BgloMADS12	4	AT5G55690.1	0	AT2G26320.1	1	C011N0418G0.1	0	C004N0075E0.1	4	INIL02g10678.t1	0	INIL11g26630.t1	7	Migut.D01317.1.p	1	Migut.A00654.1.p	0	Potri.010G238900.1	0	Potri.005G091100.1	6	Ab_initio_SaG06022	0	SaT03146-R1	5	SGA_v2.0_scaffold342T49433	0	SGA_v2.0_scaffold391T50619	7	SHI33749-RA	3	SHI09220-RA	5	SPA17941	2	SPA24931	1	VIT_210s0003g03015.1	0	VIT_207s0129g00650.1	0
BsubMADS5	0	BsubMADS15	5	BgloMADS5	1	BgloMADS13	7	AT1G54760.1	0	AT2G14210.1	7	C006N0120E0.1	0	C067N0023E0.1	5	INIL03g11432.t1	0	INIL02g17189.t1	6	Migut.D01316.1.p	0	Migut.L00101.1.p	1	Potri.017G040600.1	0	Potri.012G132600.1	7	SaT04996-R1	1	SaT14888-R1	8	SGA_v2.0_scaffold172T38970	0	SGA_v2.0_scaffold52T18923	8	SHI07318-RA	2	SHI20564-RA	5	SPA25613	0	SPA20109	6	VIT_200s0250g00085.1	0	VIT_218s0041g02140.1	6
BsubMADS6	0	BsubMADS16	2	BgloMADS6	0	BgloMADS14	3	AT1G60880.1	0	AT1G77980.1	9	C006N0581E0.1	1	C008N0131E0.1	7	INIL13g09292.t1	0	INIL08g23204.t1	7	Migut.D01312.1.p	1	Migut.K00963.1.p	6	Potri.017G047300.1	1	Potri.001G328400.1	1	SaT16593-R1	0	SaT12251-R1	13	SGA_v2.0_scaffold5T03073	1	SGA_v2.0_scaffold56T19998	8	SHI42934-RA	0	SHI01397-RA	8	SPA07851	2	SPA07567	1	VIT_213s0019g05285.1	0	VIT_203s0097g00160.2	1
BsubMADS7	1	BsubMADS17	2	BgloMADS7	0	BgloMADS15	6	AT5G27810.1	0	AT3G57390.1	7	C028N0110M0.1	1	C013N0366E0.1	10	INIL03g11426.t1	0	INIL15g27555.t1	6	Migut.B00770.1.p	1	Migut.H02298.1.p	5	Potri.016G118900.1	1	Potri.017G099800.1	7	SaT10288-R1	1	SaT09994-R1	5	SGA_v2.0_scaffold41T15855	0	SGA_v2.0_scaffold26T11297	7	SHI22608-RA	1	SHI11612-RA	1	SPA19823	1	SPA11510	7	VIT_200s0386g00010.1	0	VIT_200s0211g00180.1	4
BsubMADS8	0	BsubMADS18	6	BgloMADS8	0	BgloMADS16	7	AT1G60040.1	0	AT2G22630.1	6	C002N0575E0.1	0	C004N0076E0.1	7	INIL15g27817.t1	0	INIL14g03781.t1	7	Migut.B00482.1.p	0	Migut.C01334.1.p	6	Potri.006G258500.1	0	Potri.009G055700.1	7	SaT18794-R1	2	SaT23840-R1	0	SGA_v2.0_scaffold32T12977	0	SGA_v2.0_scaffold24T10612	6	SHI07325-RA	0	SHI31069-RA	4	SPA00519	5	SPA10181	8	VIT_208s0032g00974.1	0	VIT_217s0000g06340.2	9
BsubMADS9	0	BsubMADS19	6			BgloMADS17	3	AT5G39810.1	1	AT4G37940.1	6	C011N0562M0.1	0	C117N0013E0.1	7	INIL01g19678.t1	1	INIL03g22474.t1	8	Migut.B00480.1.p	0	Migut.H00589.1.p	7	Potri.007G114000.1	1	Potri.004G064300.1	7	SaT05930-R1	3	SaT21728-R1	1	SGA_v2.0_scaffold30T12416	0	SGA_v2.0_scaffold146T36210	5	SHI00086-RA	2	SHI08588-RA	6	SPA08193	0	SPA00493	5	VIT_202s0109g00384.1	1	VIT_212s0142g00360.1	8
BsubMADS10	0	BsubMADS20	6			BgloMADS18	3	AT1G29962.1	0	AT4G24540.1	7	C026N0449M0.1	1	C004N0461E0.1	7	INIL14g06735.t1	0	INIL02g11715.t1	5	Migut.D01314.1.p	0	Migut.B01668.1.p	6	Potri.001G329800.1	0	Potri.007G073000.1	5	SaT15483-R1	0	SaT20456-R1	7	SGA_v2.0_scaffold304T47921	0	SGA_v2.0_scaffold287T47181	7	SHI05162-RA	1	SHI06116-RA	8	SPA26201	0	SPA22223	8	VIT_215s0048g00495.1	0	VIT_218s0001g04810.1	1
		BsubMADS21	6			BgloMADS19	6	AT3G04100.1	0	AT1G31140.2	4	C052N0065E0.1	0	C014N0030M0.1	6	INIL09g31419.t1	0	INIL02g40649.t1	7	Migut.L00642.1.p	0	Migut.O00478.1.p	1	Potri.002G255700.1	0	Potri.017G044500.1	7	SaT05668-R1	0	SaT16856-R1	6	SGA_v2.0_scaffold111T31438	2	SGA_v2.0_scaffold45T17235	6	SHI28290-RA	0	SHI06656-RA	7	SPA01410	1	SPA00796	7	VIT_205s0049g01465.1	0	VIT_203s0017g00450.1	1
		BsubMADS22	6			BgloMADS20	6	AT1G33070.1	2	AT5G13790.1	7	C011N0393M0.1	0	C003N0164E0.1	7	INIL03g17583.t1	0	INIL09g30017.t1	7	Migut.D02159.1.p	0	Migut.B01667.1.p	7	Potri.007G113800.1	1	Potri.015G098400.1	7	SaT05699-R1	0	SaT05727-R1	10	SGA_v2.0_scaffold5006T54578	0	SGA_v2.0_scaffold118T32570	7			SHI06664-RA	5	SPA25348	1	SPA00890	5	VIT_205s0020g01055.1	1	VIT_215s0048g01240.1	0
		BsubMADS23	7			BgloMADS21	8	AT5G37415.1	2	AT4G18960.1	7	C016N0183E0.1	0	C041N0257E0.1	7	INIL14g06733.t1	0	INIL14g03769.t1	1	Migut.D01476.1.p	0	Migut.K00968.1.p	6	Potri.017G124000.1	0	Potri.003G170000.1	6	SaT04997-R1	0	SaT15365-R1	8	SGA_v2.0_scaffold511T52625	1	SGA_v2.0_scaffold2T01324	9			SHI09696-RA	1	SPA04964	6	SPA13643	7	VIT_210s0003g03970.1	0	VIT_216s0022g02400.4	0
		BsubMADS24	7			BgloMADS22	7	AT5G06500.1	0	AT1G69540.1	9	C007N0451M0.1	1	C074N0098E0.1	6	INIL04g02392.t1	3	INIL14g41853.t1	5	Migut.A00408.1.p	0	Migut.K00957.1.p	6	Potri.017G039800.1	0	Potri.003G169600.1	7	SaT21406-R1	1	SaT19250-R1	6	SGA_v2.0_scaffold98T29415	0	SGA_v2.0_scaffold83T26372	5			SHI08996-RA	6	SPA00425	1	SPA14081	0	VIT_201s0010g01500.1	1	VIT_200s0729g00010.1	0
		BsubMADS25	7			BgloMADS23	6	AT1G65360.1	1	AT5G23260.2	5	C022N0293E0.1	0			INIL14g06734.t1	0	INIL12g24881.t1	6	Migut.B00479.1.p	0	Migut.K00994.1.p	6	Potri.009G084200.1	1	Potri.001G284300.1	0	SaT17710-R1	1	SaT20376-R1	7	SGA_v2.0_scaffold144T35870	0	SGA_v2.0_scaffold69T23122	7					SPA05017	0	SPA14886	7	VIT_205s0020g01043.1	0	VIT_207s0031g01140.1	9
								AT3G18650.1	0	AT3G30260.1	7	C014N0079E0.1	0			INIL01g05020.t1	0	INIL06g38203.t1	7	Migut.A00406.1.p	0	Migut.H01211.1.p	8	Potri.006G201700.1	0	Potri.003G169700.1	6	Ab_initio_SaG03765	0	SaT20374-R1	3	SGA_v2.0_scaffold27T11644	0	SGA_v2.0_scaffold153T37050	5					SPA18672	0	SPA06990	0	VIT_203s0088g00550.1	0	VIT_208s0007g08790.1	5
								AT1G28450.1	0	AT1G26310.1	7	C072N0033E0.1	0			INIL02g10677.t1	0	INIL06g37823.t1	5	Migut.B01615.1.p	0	Migut.E00037.1.p	7	Potri.001G251400.1	0	Potri.010G154100.1	7	SaT15374-R1	0	SaT14431-R1	13	SGA_v2.0_scaffold58T20582	4	SGA_v2.0_scaffold148T36443	6					SPA06542	1	SPA22508	1	VIT_203s0088g00510.1	1	VIT_203s0167g00100.1	1
								AT1G48150.1	0	AT5G51870.3	6	C014N0383E0.1	0			INIL03g11422.t1	0	INIL09g33285.t1	3	Migut.K00930.1.p	0	Migut.H02390.1.p	1	Potri.009G084100.1	0	Potri.003G119700.2	6	SaT09157-R1	1	SaT08982-R1	1	SGA_v2.0_scaffold337T49184	0	SGA_v2.0_scaffold221T42746	6					SPA23279	2	SPA13915	3	VIT_215s0021g00560.1	1	VIT_214s0083g01050.2	7
								AT5G27944.1	0	AT5G51860.1	6	C009N0309M0.1	2			INIL06g37292.t1	0	INIL03g17609.t1	7	Migut.L01896.1.p	0	Migut.A00653.1.p	6	Potri.004G002400.1	0	Potri.018G048000.1	1	SaT00743-R1	1	SaT09021-R1	7	SGA_v2.0_scaffold1T00154	0	SGA_v2.0_scaffold25T10919	9					SPA25616	2	SPA17749	7	VIT_213s0074g00182.1	0	VIT_218s0001g09540.1	10
								AT5G26950.1	0	AT5G65070.3	7					INIL14g06732.t1	0	INIL14g41600.t1	7	Migut.B00884.1.p	0	Migut.A00649.1.p	5	Potri.013G107600.1	0	Potri.013G104900.1	7	SaT02641-R1	1	SaT19272-R1	7	SGA_v2.0_scaffold157T37317	0	SGA_v2.0_scaffold37T14631	4					SPA21775	0	SPA11511	8	VIT_203s0088g00610.1	0	VIT_217s0000g04990.1	7
								AT1G28460.1	0	AT3G57230.1	6					INIL07g06020.t1	2	INIL01g25143.t1	8	Migut.H00739.1.p	0	Migut.K00969.5.p	7	Potri.013G001700.1	0	Potri.012G062300.1	7	SaT05713-R1	1	SaT22058-R1	6	SGA_v2.0_scaffold5T03072	0	SGA_v2.0_scaffold2T01094	6					SPA26088	0	SPA17746	0	VIT_215s0021g02250.1	0	VIT_217s0000g01230.6	5
								AT5G26880.1	6	AT2G42830.2	5					INIL14g21274.t1	0	INIL08g04824.t1	5	Migut.G00091.1.p	0	Migut.H01397.1.p	0	Potri.012G109900.1	0	Potri.015G134800.1	8	Ab_initio_SaG12132	1	SaT00720-R1	5	SGA_v2.0_scaffold32T12976	1	SGA_v2.0_scaffold11T05622	5							SPA05335	7	VIT_203s0088g00600.1	0	VIT_212s0059g02675.1	2
								AT5G26650.1	0	AT1G22130.1	9					INIL07g06027.t1	1	INIL13g07818.t1	7	Migut.J01317.1.p	0	Migut.G00778.1.p	6	Potri.T101400.1	0	Potri.014G074100.1	7			SaT07546-R1	1	SGA_v2.0_scaffold14T07116	0	SGA_v2.0_scaffold153T37049	7							SPA09480	4	VIT_217s0000g08445.1	0	VIT_210s0003g02070.2	6
								AT4G11250.1	0	AT5G65050.3	6					INIL14g21282.t1	0	INIL02g11869.t1	7	Migut.D01313.1.p	2	Migut.H02293.1.p	7	Potri.002G062000.1	0	Potri.002G079000.1	6			SaT16647-R1	6	SGA_v2.0_scaffold104T30212	2	SGA_v2.0_scaffold10T05408	2							SPA11810	5	VIT_207s0005g06590.1	0	VIT_215s0024g01860.1	1
								AT2G28700.1	2	AT4G09960.3	7					INIL12g01160.t1	0	INIL01g36557.t1	6	Migut.N01120.1.p	0	Migut.N01802.1.p	7	Potri.004G010200.1	0	Potri.002G092300.1	11			SaT12063-R1	3	SGA_v2.0_scaffold144T35855	0	SGA_v2.0_scaffold51T18728	8									VIT_210s0003g03020.1	0	VIT_204s0023g02820.1	6
								AT1G60920.1	0	AT3G02310.1	6					INIL14g21281.t1	0	INIL09g35955.t1	6	Migut.F01550.1.p	0	Migut.C01064.1.p	6	Potri.004G131100.1	0	Potri.001G058200.1	5			SaT05729-R1	1	SGA_v2.0_scaffold4T01869	2											VIT_214s0060g00300.1	0	VIT_216s0022g02330.1	7
								AT5G49420.1	0	AT1G24260.2	7					INIL15g39088.t1	0	INIL15g28129.t1	7	Migut.L00643.1.p	1	Migut.M00986.3.p	7	Potri.T101600.1	0	Potri.007G087500.1	9			SaT15620-R1	11													VIT_205s0020g01046.1	1	VIT_218s0041g01880.1	7
								AT5G58890.1	0	AT4G11880.1	6					INIL03g11430.t1	0	INIL13g08258.t1	8	Migut.I00404.1.p	1	Migut.K00960.1.p	6	Potri.005G002400.1	0	Potri.005G155700.1	7			SaT15598-R1	8													VIT_215s0021g02220.1	0	VIT_202s0025g02350.1	3
								AT5G27070.1	0	AT5G15800.2	6					INIL03g17314.t1	0	INIL11g22431.t1	6	Migut.B01089.1.p	0	Migut.K00964.1.p	6	Potri.015G077800.1	0	Potri.004G115400.1	7			SaT19783-R1	6													VIT_215s0048g00485.1	0	VIT_214s0083g01030.1	7
								AT5G49490.1	0	AT2G45660.1	6					INIL07g06021.t1	0	INIL09g30018.t1	6	Migut.N00838.1.p	0	Migut.C01339.1.p	6	Potri.001G214900.1	0	Potri.004G115500.1	7			SaT14802-R1	2													VIT_200s1450g00005.1	0	VIT_201s0011g00110.1	7
								AT5G27580.1	0	AT2G03710.1	7					INIL05g02142.t1	1	INIL04g34972.t1	7	Migut.L00835.1.p	0	Migut.I00190.1.p	10	Potri.008G041500.1	0	Potri.007G050400.1	3			SaT14429-R1	7													VIT_202s0109g00382.1	1	VIT_217s0000g05000.1	7
								AT5G27130.1	0	AT1G71692.1	6					INIL14g21275.t1	0	INIL03g22473.t1	7	Migut.D01311.1.p	1	Migut.N03130.1.p	6	Potri.004G222200.1	0	Potri.002G105600.1	7			SaT07474-R1	10													VIT_210s0003g03025.1	0	VIT_203s0017g00440.1	1
								AT5G04640.1	0	AT2G03060.2	9					INIL15g27814.t1	1	INIL12g01448.t1	6	Migut.L00834.1.p	0	Migut.B00527.1.p	7	Potri.013G018100.1	0	Potri.007G017000.1	6			SaT05533-R1	6															VIT_214s0068g01800.1	1
								AT4G36590.1	1	AT2G45650.1	7					INIL08g38549.t1	1	INIL06g38202.t1	6	Migut.N01290.1.p	0	Migut.A00904.1.p	1	Potri.017G040700.1	0	Potri.019G076800.1	6			SaT00518-R1	6															VIT_201s0010g03900.4	6
								AT5G26630.1	0	AT5G65060.1	6					INIL15g27657.t1	0	INIL12g01106.t1	7	Migut.G01095.1.p	0	Migut.B00557.1.p	7	Potri.010G098100.1	0	Potri.002G109700.1	1			SaT22488-R1	19															VIT_200s0313g00070.1	7
								AT1G22590.2	0	AT5G60910.1	7					INIL13g10970.t1	0	INIL13g08257.t1	7	Migut.B00708.1.p	0	Migut.I00364.1.p	0	Potri.008G020300.1	0	Potri.003G170200.1	6			SaT11447-R1	7															VIT_201s0011g00100.1	7
								AT5G40120.1	0	AT5G20240.1	5					INIL03g11425.t1	0	INIL04g02328.t1	7	Migut.N01504.1.p	1	Migut.K00961.2.p	6	Potri.012G110100.1	0	Potri.017G044200.1	7			SaT14430-R1	5															VIT_202s0025g04650.1	6
								AT4G02235.1	1	AT1G18750.1	9					INIL03g11427.t1	0	INIL11g22433.t1	7	Migut.O00574.1.p	0	Migut.F01157.1.p	6	Potri.016G119000.1	0	Potri.005G155300.1	7			SaT14887-R1	8															VIT_215s0107g00120.1	6
								AT5G65330.1	0	AT5G10140.1	6					INIL03g17580.t1	0			Migut.D01315.1.p	1	Migut.K01032.1.p	1	Potri.004G130900.1	0	Potri.008G088200.1	10			SaT17741-R1	8															VIT_218s0001g01760.1	6
								AT2G24840.1	0	AT1G77950.1	9					INIL03g11434.t1	0			Migut.M00928.1.p	0	Migut.C00785.1.p	1			Potri.008G098500.1	7			SaT21037-R1	4															VIT_219s0014g00310.1	1
								AT3G66656.1	0	AT1G69120.1	7					INIL01g19676.t1	0			Migut.B00481.1.p	0	Migut.A00326.1.p	6			Potri.012G125600.1	5			SaT01121-R1	7															VIT_215s0024g02000.1	0
								AT5G27960.1	1	AT5G65080.1	6					INIL03g11424.t1	0			Migut.C01325.1.p	0	Migut.D01274.1.p	7			Potri.007G120000.1	6																			VIT_204s0008g01980.1	6
								AT5G48670.1	0	AT5G62165.1	6					INIL01g15946.t1	1					Migut.F00397.1.p	6			Potri.005G169600.1	0																			VIT_200s0211g00150.1	0
								AT1G59810.1	0	AT3G61120.1	7					INIL15g39089.t1	1					Migut.C00517.1.p	8			Potri.002G151700.4	6																			VIT_218s0001g07900.3	7
								AT1G65300.1	0	AT2G22540.1	8					INIL15g39087.t1	2					Migut.D01622.1.p	4			Potri.005G118000.1	6																			VIT_201s0010g03896.1	0
								AT5G38740.1	0	AT4G22950.1	6					INIL03g14975.t1	0					Migut.K00984.1.p	6			Potri.001G112400.1	6																			VIT_218s0001g07460.2	7
								AT5G38620.1	0							INIL14g03750.t1	0					Migut.N02839.1.p	0			Potri.005G150700.1	1																			VIT_210s0042g00820.1	5
								AT5G41200.1	0							INIL14g06731.t1	0					Migut.H00286.1.p	6			Potri.007G010800.1	6																			VIT_218s0001g13460.1	6
								AT1G65330.1	0							INIL14g06737.t1	0					Migut.K00996.1.p	6			Potri.002G028400.1	6																			VIT_215s0048g01270.1	7
								AT1G46408.1	0							INIL04g02386.t1	1					Migut.K00958.1.p	6			Potri.010G167300.1	9
								AT2G34440.1	0							INIL01g15941.t1	0					Migut.K01001.1.p	4			Potri.005G182200.1	6
								AT5G27090.1	0							INIL14g21273.t1	0					Migut.N01413.1.p	7			Potri.019G077200.1	7
								AT1G01530.1	1													Migut.K00965.1.p	6			Potri.012G100200.2	7
								AT1G47760.1	1																	Potri.011G075800.1	6
								AT1G17310.1	0																	Potri.017G099700.1	7
								AT5G27050.1	0																	Potri.015G125500.1	3
								AT1G31640.1	1																	Potri.001G058400.1	7
								AT1G72350.1	0																	Potri.012G133000.1	6
								AT1G31630.1	0																	Potri.003G169800.1	1
								AT5G60440.1	1																	Potri.006G048700.1	7
								AT5G39750.1	0																	Potri.007G115000.1	6
								AT2G40210.1	0																	Potri.013G102600.1	6
																										Potri.007G115100.1	8

## Sheet: Table S6
Table S6 Length of the first exon of MADS-box in B. subcupularis and B. fungosa var. globosa
M-type	length (bp)	MIKC-type	length (bp)	8 non-K-domain	length (bp)
BgloMADS5	413	BgloMADS18	181	BgloMADS11	184
BgloMADS7	518	BgloMADS22	184	BgloMADS9	184
BgloMADS8	623	BgloMADS23	184	BgloMADS10	251
BgloMADS1	887	BgloMADS20	181	BsubMADS14	184
BgloMADS3	743	BgloMADS16	244	BsubMADS11	215
BgloMADS4	548	BgloMADS19	184	BsubMADS12	184
BgloMADS6	731	BgloMADS15	187	BsubMADS13	203
BgloMADS2	467	BgloMADS14	187	BsubMADS16	175
BsubMADS7	392	BgloMADS21	184	average	197.5
BsubMADS5	614	BgloMADS17	184
BsubMADS8	653	BgloMADS13	184
BsubMADS6	644	BgloMADS12	184
BsubMADS3	876	BsubMADS18	187
BsubMADS10	740	BsubMADS23	184
BsubMADS4	647	BsubMADS19	187
BsubMADS9	755	BsubMADS22	181
BsubMADS1	497	BsubMADS17	187
BsubMADS2	902	BsubMADS25	184
average	647.222	BsubMADS20	184
		BsubMADS21	226
		BsubMADS24	184
		BsubMADS15	184
		average	188.909

## Sheet: Table S7
Table S7 Conserved motifs identified in B. subcupularis and B. fungosa var. globosa MADS-box proteins using the MEME motif search tool (aa, amino acids)
Motif name	Sequences	Width (aa)	E-value	Pfam Family
Motif 1	RQVTFSKRRNGLFKKASELSVLCDAEVAL	29	5.1e-2652	SRF-TF
Motif 2	MGRGKIEJKRIENKT	15	6.1e-699	SRF-TF
Motif 3	IIFSPSGKLYEFSSS	15	7.2e-568	SRF-TF
Motif 4	SLSIKELZSLEKQLETSLKRIRSRKTZLM	29	1.9e-481	K-box
Motif 5	RSKVRDIASRFSZLPEAERRKKMVBLETFLKKRIKKAKKQL	41	5.6e-434
Motif 6	NLQQEYAKLKKKIELLQRSQRKLLGEDLG	29	2.1e-232	K-box
Motif 7	SMEKTJERYQKASAD	15	3e-150
Motif 8	TQSLNPSQFSLFMYNHGDNTLSQIP	25	6.6e-133
Motif 9	NVLKYPLADHYPPDQVSQLIQSLELHVSKFQERLRFLESQKQ	42	4.1e-141
Motif 10	LEZJEDLQKKEKELLEENKTL	21	2.8e-120	K-box
Motif 11	GKMSEYHYDARDLQDLSLYIBQYLNQLNRRIEILKENGESSSS	43	2.3e-106
Motif 12	GKMSEYHYDARDLQDLSLYIBQYLNQLNRRIEILKENGESSSS	50	1e-93
Motif 13	WWEKPVEELSVEELEEVKAAL	21	7.2e-82
Motif 14	GGHEHIPFMDGNYYNYHQLPTVGLTSTGHMPSTTATTTTT	40	3.1e-78
Motif 15	PPSSESNVSFYSFGHSSVDNVVSAFLSGQ	29	2.7e-77

## Sheet: Table S8
Table S8 Gene number of flower meristem and flower-related genes in Balanophora and reference species
OL_id	class	Arabidopsis ID	A. coerulea	A. thaliana	V. vinifera	B. subcupularis	B. fungosa var. globosa	C. australis	M. oleifera	S. album	S. parasitica	S. himalayana
CCA1	Circadian Clock	AT2G46830	1	2	1	0	0	1	1	1	1	0
ELF3	Circadian Clock	AT2G25930	2	2	2	1	1	1	1	2	2	2
ELF4	Circadian Clock	AT2G40080	1	2	2	0	0	1	1	1	2	0
GI	Circadian Clock	AT1G22770	1	1	1	0	0	1	1	1	1	0
LHY	Circadian Clock	AT1G01060	1	2	1	0	0	1	1	1	1	0
PRR3	Circadian Clock	AT5G60100	2	2	3	1	1	3	2	2	1	0
PRR5	Circadian Clock	AT5G24470	1	3	2	0	0	1	2	2	1	0
PRR7	Circadian Clock	AT5G02810	2	2	3	1	1	3	2	2	1	0
PRR9	Circadian Clock	AT2G46790	1	3	2	0	0	1	2	2	1	0
TOC1, PRR1	Circadian Clock	AT5G61380	1	1	1	0	0	1	1	2	1	0
ZTL	Circadian Clock	AT5G57360	1	1	2	0	0	1	1	1	1	0
AGL24/SVP	Flower development and meristem identity	AT4G24540	2	2	4	1	1	0	1	2	2	3
AP1	Flower development and meristem identity	AT1G69120	1	2	1	1	1	0	1	2	2	0
LFY	Flower development and meristem identity	AT5G61850	1	1	1	1	1	1	1	1	2	1
AP2	Flower development and meristem identity	AT4G36920	2	2	1	1	1	1	1	1	1	2
CAL	Flower development and meristem identity	AT1G26310	1	2	1	1	1	0	1	2	2	0
FUL, AGL8	Flower development and meristem identity	AT5G60910	3	1	0	0	0	1	1	1	0	1
FLC, AGL25, FLF	Flowering time integrator	AT5G10140	3	6	3	1	1	0	3	4	4	0
FT	Flowering time integrator	AT1G65480	3	2	0	1	1	1	1	2	1	0
SOC1, AGL20	Flowering time integrator	AT2G45660	2	1	1	1	1	1	1	1	0	0
CIB1	Photoperiodism, light perception and signaling	AT4G34530	2	1	2	1	2	1	2	1	1	1
CO	Photoperiodism, light perception and signaling	AT5G15840	1	3	1	0	0	0	1	1	1	0
COP1	Photoperiodism, light perception and signaling	AT2G32950	1	1	2	3	1	2	1	1	1	2
CRY1	Photoperiodism, light perception and signaling	AT4G08920	1	1	1	0	0	1	1	1	2	0
CRY2	Photoperiodism, light perception and signaling	AT1G04400	1	1	1	0	0	1	1	1	1	0
FD	Photoperiodism, light perception and signaling	AT4G35900	1	2	3	1	1	1	2	2	2	0
FKF1, ADO3	Photoperiodism, light perception and signaling	AT1G68050	1	3	3	0	0	1	2	2	2	0
GI	Photoperiodism, light perception and signaling	AT1G22770	1	1	1	0	0	1	1	1	1	0
PHYA	Photoperiodism, light perception and signaling	AT1G09570	1	1	1	1	1	1	2	1	1	0
PHYB	Photoperiodism, light perception and signaling	AT2G18790	1	2	1	0	0	3	1	1	1	1
AGL17	Photoperiodism, light perception and signaling	AT2G22630	1	4	2	0	0	2	1	1	0	0
FRI	Vernalization	AT4G00650	1	1	2	1	1	0	1	1	2	0
FLX	Vernalization	AT2G30120	1	1	1	1	1	2	1	1	1	1
FLM, MAF1, AGL27	Vernalization	AT1G77080	3	6	3	1	1	1	3	4	4	0
FY	General	AT5G13480	1	1	1	1	1	1	1	1	1	1
LD	General	AT4G02560	1	1	1	1	1	1	1	1	1	1
FVE	General	AT2G19520	1	2	2	3	2	3	2	3	2	2
FCA	General	AT4G16280	2	2	2	1	1	2	1	2	2	4

## Sheet: Table S9
Table S9 the alignment information of total 829 MADS-box genes of different species
BsubMADS21 ----------------------------------------------------------------------------------------------------------------------------------------------------------------------------------------------------------------------------------------------------------------------------------------------------------------------------------------------------------------------------------------------------…
BsubMADS23 ----------------------------------------------------------------------------------------------------------------------------------------------------------------------------------------------------------------------------------------------------------------------------------------------------------------------------------------------------------------------------------------------------…
BsubMADS25 ----------------------------------------------------------------------------------------------------------------------------------------------------------------------------------------------------------------------------------------------------------------------------------------------------------------------------------------------------------------------------------------------------…
BsubMADS17 ----------------------------------------------------------------------------------------------------------------------------------------------------------------------------------------------------------------------------------------------------------------------------------------------------------------------------------------------------------------------------------------------------…
BsubMADS18 ----------------------------------------------------------------------------------------------------------------------------------------------------------------------------------------------------------------------------------------------------------------------------------------------------------------------------------------------------------------------------------------------------…
BsubMADS20 ----------------------------------------------------------------------------------------------------------------------------------------------------------------------------------------------------------------------------------------------------------------------------------------------------------------------------------------------------------------------------------------------------…
BsubMADS22 ----------------------------------------------------------------------------------------------------------------------------------------------------------------------------------------------------------------------------------------------------------------------------------------------------------------------------------------------------------------------------------------------------…
BsubMADS19 ----------------------------------------------------------------------------------------------------------------------------------------------------------------------------------------------------------------------------------------------------------------------------------------------------------------------------------------------------------------------------------------------------…
BsubMADS11 ----------------------------------------------------------------------------------------------------------------------------------------------------------------------------------------------------------------------------------------------------------------------------------------------------------------------------------------------------------------------------------------------------…
BsubMADS4 -----------------------------------------------------------------------------------------------------------------------------------------------------------------------------------------------------------------------------------------------------------------------------------------------------------------------------------------------------------------------------------------------------…
BsubMADS1 -----------------------------------------------------------------------------------------------------------------------------------------------------------------------------------------------------------------------------------------------------------------------------------------------------------------------------------------------------------------------------------------------------…
BsubMADS2 -----------------------------------------------------------------------------------------------------------------------------------------------------------------------------------------------------------------------------------------------------------------------------------------------------------------------------------------------------------------------------------------------------…
BsubMADS9 -----------------------------------------------------------------------------------------------------------------------------------------------------------------------------------------------------------------------------------------------------------------------------------------------------------------------------------------------------------------------------------------------------…
BsubMADS8 -----------------------------------------------------------------------------------------------------------------------------------------------------------------------------------------------------------------------------------------------------------------------------------------------------------------------------------------------------------------------------------------------------…
BsubMADS14 ----------------------------------------------------------------------------------------------------------------------------------------------------------------------------------------------------------------------------------------------------------------------------------------------------------------------------------------------------------------------------------------------------…
BsubMADS7 -----------------------------------------------------------------------------------------------------------------------------------------------------------------------------------------------------------------------------------------------------------------------------------------------------------------------------------------------------------------------------------------------------…
BsubMADS13 ----------------V-----------------------------------------------------------------------------------------------------------------------------------------------------------------------------------------------------------------------------------------------------------------------------------------------------------------------------------------------------------------------------------…
BsubMADS3 -----------------------------------------------------------------------------------------------------------------------------------------------------------------------------------------------------------------------------------------------------------------------------------------------------------------------------------------------------------------------------------------------------…
BsubMADS10 ----------------------------------------------------------------------------------------------------------------------------------------------------------------------------------------------------------------------------------------------------------------------------------------------------------------------------------------------------------------------------------------------------…
BsubMADS6 -----------------------------------------------------------------------------------------------------------------------------------------------------------------------------------------------------------------------------------------------------------------------------------------------------------------------------------------------------------------------------------------------------…
BsubMADS16 ----------------------------------------------------------------------------------------------------------------------------------------------------------------------------------------------------------------------------------------------------------------------------------------------------------------------------------------------------------------------------------------------------…
BsubMADS12 ----------------------------------------------------------------------------------------------------------------------------------------------------------------------------------------------------------------------------------------------------------------------------------------------------------------------------------------------------------------------------------------------------…
BsubMADS15 ----------------------------------------------------------------------------------------------------------------------------------------------------------------------------------------------------------------------------------------------------------------------------------------------------------------------------------------------------------------------------------------------------…
BsubMADS24 ----------------------------------------------------------------------------------------------------------------------------------------------------------------------------------------------------------------------------------------------------------------------------------------------------------------------------------------------------------------------------------------------------…
BsubMADS5 -----------------------------------------------------------------------------------------------------------------------------------------------------------------------------------------------------------------------------------------------------------------------------------------------------------------------------------------------------------------------------------------------------…
BgloMADS11 ----------------------------------------------------------------------------------------------------------------------------------------------------------------------------------------------------------------------------------------------------------------------------------------------------------------------------------------------------------------------------------------------------…
BgloMADS2 -----------------------------------------------------------------------------------------------------------------------------------------------------------------------------------------------------------------------------------------------------------------------------------------------------------------------------------------------------------------------------------------------------…
BgloMADS1 -----------------------------------------------------------------------------------------------------------------------------------------------------------------------------------------------------------------------------------------------------------------------------------------------------------------------------------------------------------------------------------------------------…
BgloMADS8 -----------------------------------------------------------------------------------------------------------------------------------------------------------------------------------------------------------------------------------------------------------------------------------------------------------------------------------------------------------------------------------------------------…
BgloMADS3 -----------------------------------------------------------------------------------------------------------------------------------------------------------------------------------------------------------------------------------------------------------------------------------------------------------------------------------------------------------------------------------------------------…
BgloMADS6 -----------------------------------------------------------------------------------------------------------------------------------------------------------------------------------------------------------------------------------------------------------------------------------------------------------------------------------------------------------------------------------------------------…
BgloMADS4 -----------------------------------------------------------------------------------------------------------------------------------------------------------------------------------------------------------------------------------------------------------------------------------------------------------------------------------------------------------------------------------------------------…
BgloMADS20 ----------------------------------------------------------------------------------------------------------------------------------------------------------------------------------------------------------------------------------------------------------------------------------------------------------------------------------------------------------------------------------------------------…
BgloMADS21 ----------------------------------------------------------------------------------------------------------------------------------------------------------------------------------------------------------------------------------------------------------------------------------------------------------------------------------------------------------------------------------------------------…
BgloMADS23 ----------------------------------------------------------------------------------------------------------------------------------------------------------------------------------------------------------------------------------------------------------------------------------------------------------------------------------------------------------------------------------------------------…
BgloMADS14 ----------------------------------------------------------------------------------------------------------------------------------------------------------------------------------------------------------------------------------------------------------------------------------------------------------------------------------------------------------------------------------------------------…
BgloMADS18 ----------------------------------------------------------------------------------------------------------------------------------------------------------------------------------------------------------------------------------------------------------------------------------------------------------------------------------------------------------------------------------------------------…
BgloMADS19 ----------------------------------------------------------------------------------------------------------------------------------------------------------------------------------------------------------------------------------------------------------------------------------------------------------------------------------------------------------------------------------------------------…
BgloMADS15 ----------------------------------------------------------------------------------------------------------------------------------------------------------------------------------------------------------------------------------------------------------------------------------------------------------------------------------------------------------------------------------------------------…
BgloMADS17 -----------------------------------------------------------------------------------------------------------------------------------------------------------------------------------------------------------------------------------------------------------------------------------N----------------------------------------------------------------------------RDMVW-------------------------------…
BgloMADS22 ----------------------------------------------------------------------------------------------------------------------------------------------------------------------------------------------------------------------------------------------------------------------------------------------------------------------------------------------------------------------------------------------------…
BgloMADS5 -----------------------------------------------------------------------------------------------------------------------------------------------------------------------------------------------------------------------------------------------------------------------------------------------------------------------------------------------------------------------------------------------------…
BgloMADS10 ----------------------------------------------------------------------------------------------------------------------------------------------------------------------------------------------------------------------------------------------------------------------------------------------------------------------------------------------------------------------------------------------------…
BgloMADS9 -----------------------------------------------------------------------------------------------------------------------------------------------------------------------------------------------------------------------------------------------------------------------------------------------------------------------------------------------------------------------------------------------------…
BgloMADS7 -----------------------------------------------------------------------------------------------------------------------------------------------------------------------------------------------------------------------------------------------------------------------------------------------------------------------------------------------------------------------------------------------------…
BgloMADS13 ----------------------------------------------------------------------------------------------------------------------------------------------------------------------------------------------------------------------------------------------------------------------------------------------------------------------------------------------------------------------------------------------------…
BgloMADS16 ----------------------------------------------------------------------------------------------------------------------------------------------------------------------------------------------------------------------------------------------------------------------------------------------------------------------------------------------------------------------------------------------------…
BgloMADS12 ----------------------------------------------------------------------------------------------------------------------------------------------------------------------------------------------------------------------------------------------------------------------------------------------------------------------------------------------------------------------------------------------------…
STKY10412 -----------------------------------------------------------------------------------------------------------------------------------------------------------------------------------------------------------------------------------------------------------------------------------------------------------------------------------------------------------------------------------------------------…
STKY1198 ------------------------------------------------------------------------------------------------------------------------------------------------------------------------------------------------------------------------------------------------------------------------------------------------------------------------------------------------------------------------------------------------------…
STKY1199 ------------------------------------------------------------------------------------------------------------------------------------------------------------------------------------------------------------------------------------------------------------------------------------------------------------------------------------------------------------------------------------------------------…
STKY1200 ------------------------------------------------------------------------------------------------------------------------------------------------------------------------------------------------------------------------------------------------------------------------------------------------------------------------------------------------------------------------------------------------------…
STKY4986 ------------------------------------------------------------------------------------------------------------------------------------------------------------------------------------------------------------------------------------------------------------------------------------------------------------------------------------------------------------------------------------------------------…
STKY4987 ------------------------------------------------------------------------------------------------------------------------------------------------------------------------------------------------------------------------------------------------------------------------------------------------------------------------------------------------------------------------------------------------------…
STKY6327 ------------------------------------------------------------------------------------------------------------------------------------------------------------------------------------------------------------------------------------------------------------------------------------------------------------------------------------------------------------------------------------------------------…
STKY6328 ------------------------------------------------------------------------------------------------------------------------------------------------------------------------------------------------------------------------------------------------------------------------------------------------------------------------------------------------------------------------------------------------------…
STKY6560 ------------------------------------------------------------------------------------------------------------------------------------------------------------------------------------------------------------------------------------------------------------------------------------------------------------------------------------------------------------------------------------------------------…
STKY6561 ------------------------------------------------------------------------------------------------------------------------------------------------------------------------------------------------------------------------------------------------------------------------------------------------------------------------------------------------------------------------------------------------------…
STKY6562 ------------------------------------------------------------------------------------------------------------------------------------------------------------------------------------------------------------------------------------------------------------------------------------------------------------------------------------------------------------------------------------------------------…
STKY70836 -----------------------------------------------------------------------------------------------------------------------------------------------------------------------------------------------------------------------------------------------------------------------------------------------------------------------------------------------------------------------------------------------------…
STKY75111 -----------------------------------------------------------------------------------------------------------------------------------------------------------------------------------------------------------------------------------------------------------------------------------------------------------------------------------------------------------------------------------------------------…
STKY75780 -----------------------------------------------------------------------------------------------------------------------------------------------------------------------------------------------------------------------------------------------------------------------------------------------------------------------------------------------------------------------------------------------------…
STKY75913 -----------------------------------------------------------------------------------------------------------------------------------------------------------------------------------------------------------------------------------------------------------------------------------------------------------------------------------------------------------------------------------------------------…
STKY76815 -----------------------------------------------------------------------------------------------------------------------------------------------------------------------------------------------------------------------------------------------------------------------------------------------------------------------------------------------------------------------------------------------------…
STKY77699 -----------------------------------------------------------------------------------------------------------------------------------------------------------------------------------------------------------------------------------------------------------------------------------------------------------------------------------------------------------------------------------------------------…
STKY9026 ------------------------------------------------------------------------------------------------------------------------------------------------------------------------------------------------------------------------------------------------------------------------------------------------------------------------------------------------------------------------------------------------------…
STKY9690 ------------------------------------------------------------------------------------------------------------------------------------------------------------------------------------------------------------------------------------------------------------------------------------------------------------------------------------------------------------------------------------------------------…
STKY9830 ------------------------------------------------------------------------------------------------------------------------------------------------------------------------------------------------------------------------------------------------------------------------------------------------------------------------------------------------------------------------------------------------------…
Aqcoe0058s0001.1 ----------------------------------------------------------------------------------------------------------------------------------------------------------------------------------------------------------------------------------------------------------------------------------------------------------------------------------------------------------------------------------------------…
AT1G24260.2_SEP3 ----------------------------------------------------------------------------------------------------------------------------------------------------------------------------------------------------------------------------------------------------------------------------------------------------------------------------------------------------------------------------------------------…
AT1G26310.1_CAL -----------------------------------------------------------------------------------------------------------------------------------------------------------------------------------------------------------------------------------------------------------------------------------------------------------------------------------------------------------------------------------------------…
AT1G31140.2_GOA -----------------------------------------------------------------------------------------------------------------------------------------------------------------------------------------------------------------------------------------------------------------------------------------------------------------------------------------------------------------------------------------------…
AT1G69120.1_AP1 -----------------------------------------------------------------------------------------------------------------------------------------------------------------------------------------------------------------------------------------------------------------------------------------------------------------------------------------------------------------------------------------------…
AT1G71692.1_AGL12 ---------------------------------------------------------------------------------------------------------------------------------------------------------------------------------------------------------------------------------------------------------------------------------------------------------------------------------------------------------------------------------------------…
AT1G77080.4_MAF1 ----------------------------------------------------------------------------------------------------------------------------------------------------------------------------------------------------------------------------------------------------------------------------------------------------------------------------------------------------------------------------------------------…
AT2G03710.1_SEP4 ----------------------------------------------------------------------------------------------------------------------------------------------------------------------------------------------------------------------------------------------------------------------------------------------------------------------------------------------------------------------------------------------…
AT2G14210.1_AGL44 ---------------------------------------------------------------------------------------------------------------------------------------------------------------------------------------------------------------------------------------------------------------------------------------------------------------------------------------------------------------------------------------------…
AT2G22540.1_SVP -----------------------------------------------------------------------------------------------------------------------------------------------------------------------------------------------------------------------------------------------------------------------------------------------------------------------------------------------------------------------------------------------…
AT2G22630.1_AGL17 ---------------------------------------------------------------------------------------------------------------------------------------------------------------------------------------------------------------------------------------------------------------------------------------------------------------------------------------------------------------------------------------------…
AT2G42830.2_SHP2 ----------------------------------------------------------------------------------------------------------------------------------------------------------------------------------------------------------------------------------------------------------------------------------------------------------------------------------------------------------------------------------------------…
AT2G45650.1_AGL6 ----------------------------------------------------------------------------------------------------------------------------------------------------------------------------------------------------------------------------------------------------------------------------------------------------------------------------------------------------------------------------------------------…
AT2G45660.1_AGL20 ---------------------------------------------------------------------------------------------------------------------------------------------------------------------------------------------------------------------------------------------------------------------------------------------------------------------------------------------------------------------------------------------…
AT3G02310.1_SEP2 ----------------------------------------------------------------------------------------------------------------------------------------------------------------------------------------------------------------------------------------------------------------------------------------------------------------------------------------------------------------------------------------------…
AT3G30260.1_AGL79 ---------------------------------------------------------------------------------------------------------------------------------------------------------------------------------------------------------------------------------------------------------------------------------------------------------------------------------------------------------------------------------------------…
AT3G54340.1_AP3 -----------------------------------------------------------------------------------------------------------------------------------------------------------------------------------------------------------------------------------------------------------------------------------------------------------------------------------------------------------------------------------------------…
AT3G57230.1_AGL16 ---------------------------------------------------------------------------------------------------------------------------------------------------------------------------------------------------------------------------------------------------------------------------------------------------------------------------------------------------------------------------------------------…
AT3G57390.1_AGL18 ---------------------------------------------------------------------------------------------------------------------------------------------------------------------------------------------------------------------------------------------------------------------------------------------------------------------------------------------------------------------------------------------…
AT3G58780.3_SHP -----------------------------------------------------------------------------------------------------------------------------------------------------------------------------------------------------------------------------------------------------------------------------------------------------------------------------------------------------------------------------------------------…
AT3G61120.1_AGL13 ---------------------------------------------------------------------------------------------------------------------------------------------------------------------------------------------------------------------------------------------------------------------------------------------------------------------------------------------------------------------------------------------…
AT4G09960.3_STK -----------------------------------------------------------------------------------------------------------------------------------------------------------------------------------------------------------------------------------------------------------------------------------------------------------------------------------------------------------------------------------------------…
AT4G11880.1_AGL14 ---------------------------------------------------------------------------------------------------------------------------------------------------------------------------------------------------------------------------------------------------------------------------------------------------------------------------------------------------------------------------------------------…
AT4G18960.1_AG ------------------------------------------------------------------------------------------------------------------------------------------------------------------------------------------------------------------------------------------------------------------------------------------------------------------------------------------------------------------------------------------------…
AT4G22950.1_AGL19 ---------------------------------------------------------------------------------------------------------------------------------------------------------------------------------------------------------------------------------------------------------------------------------------------------------------------------------------------------------------------------------------------…
AT4G24540.1_AGL24 ---------------------------------------------------------------------------------------------------------------------------------------------------------------------------------------------------------------------------------------------------------------------------------------------------------------------------------------------------------------------------------------------…
AT4G37940.1_AGL21 ---------------------------------------------------------------------------------------------------------------------------------------------------------------------------------------------------------------------------------------------------------------------------------------------------------------------------------------------------------------------------------------------…
AT5G10140.1_FLC -----------------------------------------------------------------------------------------------------------------------------------------------------------------------------------------------------------------------------------------------------------------------------------------------------------------------------------------------------------------------------------------------…
AT5G13790.1_AGL15 ---------------------------------------------------------------------------------------------------------------------------------------------------------------------------------------------------------------------------------------------------------------------------------------------------------------------------------------------------------------------------------------------…
AT5G15800.2_SEP1 ----------------------------------------------------------------------------------------------------------------------------------------------------------------------------------------------------------------------------------------------------------------------------------------------------------------------------------------------------------------------------------------------…
AT5G20240.1_PI ------------------------------------------------------------------------------------------------------------------------------------------------------------------------------------------------------------------------------------------------------------------------------------------------------------------------------------------------------------------------------------------------…
AT5G23260.2_AGL32 ---------------------------------------------------------------------------------------------------------------------------------------------------------------------------------------------------------------------------------------------------------------------------------------------------------------------------------------------------------------------------------------------…
AT5G51860.1_AGL72 ---------------------------------------------------------------------------------------------------------------------------------------------------------------------------------------------------------------------------------------------------------------------------------------------------------------------------------------------------------------------------------------------…
AT5G51870.3_AGL71 ---------------------------------------------------------------------------------------------------------------------------------------------------------------------------------------------------------------------------------------------------------------------------------------------------------------------------------------------------------------------------------------------…
AT5G60910.1_AGL8 ----------------------------------------------------------------------------------------------------------------------------------------------------------------------------------------------------------------------------------------------------------------------------------------------------------------------------------------------------------------------------------------------…
AT5G62165.1_AGL42 ---------------------------------------------------------------------------------------------------------------------------------------------------------------------------------------------------------------------------------------------------------------------------------------------------------------------------------------------------------------------------------------------…
AT5G65050.3_AGL31 ---------------------------------------------------------------------------------------------------------------------------------------------------------------------------------------------------------------------------------------------------------------------------------------------------------------------------------------------------------------------------------------------…
AT5G65060.1_MAF3 ----------------------------------------------------------------------------------------------------------------------------------------------------------------------------------------------------------------------------------------------------------------------------------------------------------------------------------------------------------------------------------------------…
AT5G65070.3_MAF4 ----------------------------------------------------------------------------------------------------------------------------------------------------------------------------------------------------------------------------------------------------------------------------------------------------------------------------------------------------------------------------------------------…
AT5G65080.1_MAF5 ----------------------------------------------------------------------------------------------------------------------------------------------------------------------------------------------------------------------------------------------------------------------------------------------------------------------------------------------------------------------------------------------…
AT1G18750.1_AGL65 ---------------------------------------------------------------------------------------------------------------------------------------------------------------------------------------------------------------------------------------------------------------------------------------------------------------------------------------------------------------------------------------------…
AT1G22130.1_AGL104 --------------------------------------------------------------------------------------------------------------------------------------------------------------------------------------------------------------------------------------------------------------------------------------------------------------------------------------------------------------------------------------------…
AT1G69540.1_AGL94 ---------------------------------------------------------------------------------------------------------------------------------------------------------------------------------------------------------------------------------------------------------------------------------------------------------------------------------------------------------------------------------------------…
AT1G77950.1_AGL67 ---------------------------------------------------------------------------------------------------------------------------------------------------------------------------------------------------------------------------------------------------------------------------------------------------------------------------------------------------------------------------------------------…
AT1G77980.1_AGL66 ---------------------------------------------------------------------------------------------------------------------------------------------------------------------------------------------------------------------------------------------------------------------------------------------------------------------------------------------------------------------------------------------…
AT2G03060.2_AGL30 ---------------------------------------------------------------------------------------------------------------------------------------------------------------------------------------------------------------------------------------------------------------------------------------------------------------------------------------------------------------------------------------------…
AT2G26320.1_AGL33 ---------------------------------------------------------------------------------------------------------------------------------------------------------------------------------------------------------------------------------------------------------------------------------------------------------------------------------------------------------------------------------------------…
AT1G01530.1_AGL28 ---------------------------------------------------------------------------------------------------------------------------------------------------------------------------------------------------------------------------------------------------------------------------------------------------------------------------------------------------------------------------------------------…
AT1G17310.1_AGL100 --------------------------------------------------------------------------------------------------------------------------------------------------------------------------------------------------------------------------------------------------------------------------------------------------------------------------------------------------------------------------------------------…
AT1G28450.1_AGL58 ---------------------------------------------------------------------------------------------------------------------------------------------------------------------------------------------------------------------------------------------------------------------------------------------------------------------------------------------------------------------------------------------…
AT1G28460.1_AGL59 ---------------------------------------------------------------------------------------------------------------------------------------------------------------------------------------------------------------------------------------------------------------------------------------------------------------------------------------------------------------------------------------------…
AT1G29962.1_AGL64 ---------------------------------------------------------------------------------------------------------------------------------------------------------------------------------------------------------------------------------------------------------------------------------------------------------------------------------------------------------------------------------------------…
AT1G46408.1_AGL97 ---------------------------------------------------------------------------------------------------------------------------------------------------------------------------------------------------------------------------------------------------------------------------------------------------------------------------------------------------------------------------------------------…
AT1G47760.1_AGL102 --------------------------------------------------------------------------------------------------------------------------------------------------------------------------------------------------------------------------------------------------------------------------------------------------------------------------------------------------------------------------------------------…
AT1G48150.1_AGL74 ---------------------------------------------------------------------------------------------------------------------------------------------------------------------------------------------------------------------------------------------------------------------------------------------------------------------------------------------------------------------------------------------…
AT1G54760.1_AGL85 ---------------------------------------------------------------------------------------------------------------------------------------------------------------------------------------------------------------------------------------------------------------------------------------------------------------------------------------------------------------------------------------------…
AT1G60880.1_AGL56 ---------------------------------------------------------------------------------------------------------------------------------------------------------------------------------------------------------------------------------------------------------------------------------------------------------------------------------------------------------------------------------------------…
AT1G60920.1_AGL55 ---------------------------------------------------------------------------------------------------------------------------------------------------------------------------------------------------------------------------------------------------------------------------------------------------------------------------------------------------------------------------------------------…
AT1G65360.1_AGL23 ---------------------------------------------------------------------------------------------------------------------------------------------------------------------------------------------------------------------------------------------------------------------------------------------------------------------------------------------------------------------------------------------…
AT1G72350.1_AGL60 ---------------------------------------------------------------------------------------------------------------------------------------------------------------------------------------------------------------------------------------------------------------------------------------------------------------------------------------------------------------------------------------------…
AT2G24840.1_AGL61 ---------------------------------------------------------------------------------------------------------------------------------------------------------------------------------------------------------------------------------------------------------------------------------------------------------------------------------------------------------------------------------------------…
AT2G34440.1_AGL29 ---------------------------------------------------------------------------------------------------------------------------------------------------------------------------------------------------------------------------------------------------------------------------------------------------------------------------------------------------------------------------------------------…
AT3G04100.1_AGL57 ---------------------------------------------------------------------------------------------------------------------------------------------------------------------------------------------------------------------------------------------------------------------------------------------------------------------------------------------------------------------------------------------…
AT3G66656.1_AGL91 ---------------------------------------------------------------------------------------------------------------------------------------------------------------------------------------------------------------------------------------------------------------------------------------------------------------------------------------------------------------------------------------------…
AT4G36590.1_AGL40 ---------------------------------------------------------------------------------------------------------------------------------------------------------------------------------------------------------------------------------------------------------------------------------------------------------------------------------------------------------------------------------------------…
AT5G04640.1_AGL99 ---------------------------------------------------------------------------------------------------------------------------------------------------------------------------------------------------------------------------------------------------------------------------------------------------------------------------------------------------------------------------------------------…
AT5G27130.1_AGL39 ---------------------------------------------------------------------------------------------------------------------------------------------------------------------------------------------------------------------------------------------------------------------------------------------------------------------------------------------------------------------------------------------…
AT5G38620.1_AGL73 ---------------------------------------------------------------------------------------------------------------------------------------------------------------------------------------------------------------------------------------------------------------------------------------------------------------------------------------------------------------------------------------------…
AT5G49420.1_AGL84 ---------------------------------------------------------------------------------------------------------------------------------------------------------------------------------------------------------------------------------------------------------------------------------------------------------------------------------------------------------------------------------------------…
AT5G49490.1_AGL83 ---------------------------------------------------------------------------------------------------------------------------------------------------------------------------------------------------------------------------------------------------------------------------------------------------------------------------------------------------------------------------------------------…
AT5G60440.1_AGL62 ---------------------------------------------------------------------------------------------------------------------------------------------------------------------------------------------------------------------------------------------------------------------------------------------------------------------------------------------------------------------------------------------…
AT1G59810.1_AGL50 ---------------------------------------------------------------------------------------------------------------------------------------------------------------------------------------------------------------------------------------------------------------------------------------------------------------------------------------------------------------------------------------------…
AT1G60040.1_AGL49 ---------------------------------------------------------------------------------------------------------------------------------------------------------------------------------------------------------------------------------------------------------------------------------------------------------------------------------------------------------------------------------------------…
AT3G18650.1_AGL103 --------------------------------------------------------------------------------------------------------------------------------------------------------------------------------------------------------------------------------------------------------------------------------------------------------------------------------------------------------------------------------------------…
AT4G02235.1_AGL51 ---------------------------------------------------------------------------------------------------------------------------------------------------------------------------------------------------------------------------------------------------------------------------------------------------------------------------------------------------------------------------------------------…
AT4G11250.1_AGL52 ---------------------------------------------------------------------------------------------------------------------------------------------------------------------------------------------------------------------------------------------------------------------------------------------------------------------------------------------------------------------------------------------…
AT5G26880.1_AGL26 ---------------------------------------------------------------------------------------------------------------------------------------------------------------------------------------------------------------------------------------------------------------------------------------------------------------------------------------------------------------------------------------------…
AT5G26950.1_AGL93 ---------------------------------------------------------------------------------------------------------------------------------------------------------------------------------------------------------------------------------------------------------------------------------------------------------------------------------------------------------------------------------------------…
AT5G27050.1_AGL101 --------------------------------------------------------------------------------------------------------------------------------------------------------------------------------------------------------------------------------------------------------------------------------------------------------------------------------------------------------------------------------------------…
AT5G27070.1_AGL53 ---------------------------------------------------------------------------------------------------------------------------------------------------------------------------------------------------------------------------------------------------------------------------------------------------------------------------------------------------------------------------------------------…
AT5G27090.1_AGL54 ---------------------------------------------------------------------------------------------------------------------------------------------------------------------------------------------------------------------------------------------------------------------------------------------------------------------------------------------------------------------------------------------…
AT5G27580.1_AGL89 ---------------------------------------------------------------------------------------------------------------------------------------------------------------------------------------------------------------------------------------------------------------------------------------------------------------------------------------------------------------------------------------------…
AT5G27944.1_AGL107 --------------------------------------------------------------------------------------------------------------------------------------------------------------------------------------------------------------------------------------------------------------------------------------------------------------------------------------------------------------------------------------------…
AT5G37415.1_AGL105 --------------------------------------------------------------------------------------------------------------------------------------------------------------------------------------------------------------------------------------------------------------------------------------------------------------------------------------------------------------------------------------------…
AT5G38740.1_AGL77 ---------------------------------------------------------------------------------------------------------------------------------------------------------------------------------------------------------------------------------------------------------------------------------------------------------------------------------------------------------------------------------------------…
AT5G39750.1_AGL81 ---------------------------------------------------------------------------------------------------------------------------------------------------------------------------------------------------------------------------------------------------------------------------------------------------------------------------------------------------------------------------------------------…
AT5G39810.1_AGL98 ---------------------------------------------------------------------------------------------------------------------------------------------------------------------------------------------------------------------------------------------------------------------------------------------------------------------------------------------------------------------------------------------…
AT5G40120.1_AGL76 ---------------------------------------------------------------------------------------------------------------------------------------------------------------------------------------------------------------------------------------------------------------------------------------------------------------------------------------------------------------------------------------------…
AT5G40220.1_AGL43 ---------------------------------------------------------------------------------------------------------------------------------------------------------------------------------------------------------------------------------------------------------------------------------------------------------------------------------------------------------------------------------------------…
AT5G41200.1_AGL75 ---------------------------------------------------------------------------------------------------------------------------------------------------------------------------------------------------------------------------------------------------------------------------------------------------------------------------------------------------------------------------------------------…
AT5G55690.1_AGL47 ---------------------------------------------------------------------------------------------------------------------------------------------------------------------------------------------------------------------------------------------------------------------------------------------------------------------------------------------------------------------------------------------…
AT5G58890.1_AGL82 ---------------------------------------------------------------------------------------------------------------------------------------------------------------------------------------------------------------------------------------------------------------------------------------------------------------------------------------------------------------------------------------------…
AT5G65330.1_AGL78 ---------------------------------------------------------------------------------------------------------------------------------------------------------------------------------------------------------------------------------------------------------------------------------------------------------------------------------------------------------------------------------------------…
AT1G22590.2_AGL87 ---------------------------------------------------------------------------------------------------------------------------------------------------------------------------------------------------------------------------------------------------------------------------------------------------------------------------------------------------------------------------------------------…
AT1G31630.1_AGL86 ---------------------------------------------------------------------------------------------------------------------------------------------------------------------------------------------------------------------------------------------------------------------------------------------------------------------------------------------------------------------------------------------…
AT1G31640.1_AGL92 ---------------------------------------------------------------------------------------------------------------------------------------------------------------------------------------------------------------------------------------------------------------------------------------------------------------------------------------------------------------------------------------------…
AT1G33070.1_AGL108 --------------------------------------------------------------------------------------------------------------------------------------------------------------------------------------------------------------------------------------------------------------------------------------------------------------------------------------------------------------------------------------------…
AT1G65300.1_AGL38 ---------------------------------------------------------------------------------------------------------------------------------------------------------------------------------------------------------------------------------------------------------------------------------------------------------------------------------------------------------------------------------------------…
AT1G65330.1_PHE1 ----------------------------------------------------------------------------------------------------------------------------------------------------------------------------------------------------------------------------------------------------------------------------------------------------------------------------------------------------------------------------------------------…
AT2G28700.1_AGL46 ---------------------------------------------------------------------------------------------------------------------------------------------------------------------------------------------------------------------------------------------------------------------------------------------------------------------------------------------------------------------------------------------…
AT2G40210.1_AGL48 ---------------------------------------------------------------------------------------------------------------------------------------------------------------------------------------------------------------------------------------------------------------------------------------------------------------------------------------------------------------------------------------------…
AT3G05860.1_AGL45 ---------------------------------------------------------------------------------------------------------------------------------------------------------------------------------------------------------------------------------------------------------------------------------------------------------------------------------------------------------------------------------------------…
AT5G06500.1_AGL96 ---------------------------------------------------------------------------------------------------------------------------------------------------------------------------------------------------------------------------------------------------------------------------------------------------------------------------------------------------------------------------------------------…
AT5G26580.1_AGL34 ---------------------------------------------------------------------------------------------------------------------------------------------------------------------------------------------------------------------------------------------------------------------------------------------------------------------------------------------------------------------------------------------…
AT5G26630.1_AGL35 ---------------------------------------------------------------------------------------------------------------------------------------------------------------------------------------------------------------------------------------------------------------------------------------------------------------------------------------------------------------------------------------------…
AT5G26650.1_AGL36 ---------------------------------------------------------------------------------------------------------------------------------------------------------------------------------------------------------------------------------------------------------------------------------------------------------------------------------------------------------------------------------------------…
AT5G27810.1_AGL106 --------------------------------------------------------------------------------------------------------------------------------------------------------------------------------------------------------------------------------------------------------------------------------------------------------------------------------------------------------------------------------------------…
AT5G27960.1_AGL90 ---------------------------------------------------------------------------------------------------------------------------------------------------------------------------------------------------------------------------------------------------------------------------------------------------------------------------------------------------------------------------------------------…
AT5G48670.1_AGL80 ---------------------------------------------------------------------------------------------------------------------------------------------------------------------------------------------------------------------------------------------------------------------------------------------------------------------------------------------------------------------------------------------…
VIT_200s0211g00180.1 ------------------------------------------------------------------------------------------------------------------------------------------------------------------------------------------------------------------------------------------------------------------------------------------------------------------------------------------------------------------------------------------…
VIT_200s0313g00070.1 ------------------------------------------------------------------------------------------------------------------------------------------------------------------------------------------------------------------------------------------------------------------------------------------------------------------------------------------------------------------------------------------…
VIT_201s0010g03900.4 ------------------------------------------------------------------------------------------------------------------------------------------------------------------------------------------------------------------------------------------------------------------------------------------------------------------------------------------------------------------------------------------…
VIT_201s0011g00100.1 ------------------------------------------------------------------------------------------------------------------------------------------------------------------------------------------------------------------------------------------------------------------------------------------------------------------------------------------------------------------------------------------…
VIT_201s0011g00110.1 ------------------------------------------------------------------------------------------------------------------------------------------------------------------------------------------------------------------------------------------------------------------------------------------------------------------------------------------------------------------------------------------…
VIT_201s0011g01560.1 ------------------------------------------------------------------------------------------------------------------------------------------------------------------------------------------------------------------------------------------------------------------------------------------------------------------------------------------------------------------------------------------…
VIT_202s0025g02350.1 ------------------------------------------------------------------------------------------------------------------------------------------------------------------------------------------------------------------------------------------------------------------------------------------------------------------------------------------------------------------------------------------…
VIT_202s0025g04650.1 ------------------------------------------------------------------------------------------------------------------------------------------------------------------------------------------------------------------------------------------------------------------------------------------------------------------------------------------------------------------------------------------…
VIT_204s0023g02820.1 M-------------CCLK------------------------------------------------------------------------------------------------------------------------------------------------------------------------------------------------------------------------------------------------------------------------------------------------------------------------------------------------------------------------…
VIT_208s0007g08790.1 ------------------------------------------------------------------------------------------------------------------------------------------------------------------------------------------------------------------------------------------------------------------------------------------------------------------------------------------------------------------------------------------…
VIT_210s0003g02070.2 ------------------------------------------------------------------------------------------------------------------------------------------------------------------------------------------------------------------------------------------------------------------------------------------------------------------------------------------------------------------------------------------…
VIT_210s0042g00820.1 ------------------------------------------------------------------------------------------------------------------------------------------------------------------------------------------------------------------------------------------------------------------------------------------------------------------------------------------------------------------------------------------…
VIT_212s0142g00360.1 ------------------------------------------------------------------------------------------------------------------------------------------------------------------------------------------------------------------------------------------------------------------------------------------------------------------------------------------------------------------------------------------…
VIT_213s0158g00100.2 ------------------------------------------------------------------------------------------------------------------------------------------------------------------------------------------------------------------------------------------------------------------------------------------------------------------------------------------------------------------------------------------…
VIT_214s0083g01030.1 ------------------------------------------------------------------------------------------------------------------------------------------------------------------------------------------------------------------------------------------------------------------------------------------------------------------------------------------------------------------------------------------…
VIT_214s0083g01050.2 ------------------------------------------------------------------------------------------------------------------------------------------------------------------------------------------------------------------------------------------------------------------------------------------------------------------------------------------------------------------------------------------…
VIT_215s0048g01270.1 ------------------------------------------------------------------------------------------------------------------------------------------------------------------------------------------------------------------------------------------------------------------------------------------------------------------------------------------------------------------------------------------…
VIT_215s0107g00120.1 ------------------------------------------------------------------------------------------------------------------------------------------------------------------------------------------------------------------------------------------------------------------------------------------------------------------------------------------------------------------------------------------…
VIT_216s0022g02330.1 ------------------------------------------------------------------------------------------------------------------------------------------------------------------------------------------------------------------------------------------------------------------------------------------------------------------------------------------------------------------------------------------…
VIT_217s0000g01230.6 ------------------------------------------------------------------------------------------------------------------------------------------------------------------------------------------------------------------------------------------------------------------------------------------------------------------------------------------------------------------------------------------…
VIT_217s0000g04990.1 ------------------------------------------------------------------------------------------------------------------------------------------------------------------------------------------------------------------------------------------------------------------------------------------------------------------------------------------------------------------------------------------…
VIT_217s0000g05000.1 ------------------------------------------------------------------------------------------------------------------------------------------------------------------------------------------------------------------------------------------------------------------------------------------------------------------------------------------------------------------------------------------…
VIT_218s0001g01760.1 ------------------------------------------------------------------------------------------------------------------------------------------------------------------------------------------------------------------------------------------------------------------------------------------------------------------------------------------------------------------------------------------…
VIT_218s0001g07460.2 ------------------------------------------------------------------------------------------------------------------------------------------------------------------------------------------------------------------------------------------------------------------------------------------------------------------------------------------------------------------------------------------…
VIT_218s0001g07900.3 ------------------------------------------------------------------------------------------------------------------------------------------------------------------------------------------------------------------------------------------------------------------------------------------------------------------------------------------------------------------------------------------…
VIT_218s0001g09540.1 ------------------------------------------------------------------------------------------------------------------------------------------------------------------------------------------------------------------------------------------------------------------------------------------------------------------------------------------------------------------------------------------…
VIT_218s0001g13460.1 ------------------------------------------------------------------------------------------------------------------------------------------------------------------------------------------------------------------------------------------------------------------------------------------------------------------------------------------------------------------------------------------…
VIT_218s0041g01880.1 ------------------------------------------------------------------------------------------------------------------------------------------------------------------------------------------------------------------------------------------------------------------------------------------------------------------------------------------------------------------------------------------…
VIT_218s0041g02140.1 ------------------------------------------------------------------------------------------------------------------------------------------------------------------------------------------------------------------------------------------------------------------------------------------------------------------------------------------------------------------------------------------…
VIT_200s0211g00150.1 ------------------------------------------------------------------------------------------------------------------------------------------------------------------------------------------------------------------------------------------------------------------------------------------------------------------------------------------------------------------------------------------…
VIT_200s0250g00085.1 ------------------------------------------------------------------------------------------------------------------------------------------------------------------------------------------------------------------------------------------------------------------------------------------------------------------------------------------------------------------------------------------…
VIT_200s0386g00010.1 ------------------------------------------------------------------------------------------------------------------------------------------------------------------------------------------------------------------------------------------------------------------------------------------------------------------------------------------------------------------------------------------…
VIT_200s0729g00010.1 ------------------------------------------------------------------------------------------------------------------------------------------------------------------------------------------------------------------------------------------------------------------------------------------------------------------------------------------------------------------------------------------…
VIT_200s1450g00005.1 ------------------------------------------------------------------------------------------------------------------------------------------------------------------------------------------------------------------------------------------------------------------------------------------------------------------------------------------------------------------------------------------…
VIT_201s0010g01500.1 ------------------------------------------------------------------------------------------------------------------------------------------------------------------------------------------------------------------------------------------------------------------------------------------------------------------------------------------------------------------------------------------…
VIT_201s0010g01530.1 ------------------------------------------------------------------------------------------------------------------------------------------------------------------------------------------------------------------------------------------------------------------------------------------------------------------------------------------------------------------------------------------…
VIT_201s0010g03896.1 ------------------------------------------------------------------------------------------------------------------------------------------------------------------------------------------------------------------------------------------------------------------------------------------------------------------------------------------------------------------------------------------…
VIT_202s0109g00382.1 ------------------------------------------------------------------------------------------------------------------------------------------------------------------------------------------------------------------------------------------------------------------------------------------------------------------------------------------------------------------------------------------…
VIT_202s0109g00384.1 ------------------------------------------------------------------------------------------------------------------------------------------------------------------------------------------------------------------------------------------------------------------------------------------------------------------------------------------------------------------------------------------…
VIT_203s0017g00360.1 ------------------------------------------------------------------------------------------------------------------------------------------------------------------------------------------------------------------------------------------------------------------------------------------------------------------------------------------------------------------------------------------…
VIT_203s0017g00440.1 ------------------------------------------------------------------------------------------------------------------------------------------------------------------------------------------------------------------------------------------------------------------------------------------------------------------------------------------------------------------------------------------…
VIT_203s0017g00450.1 ------------------------------------------------------------------------------------------------------------------------------------------------------------------------------------------------------------------------------------------------------------------------------------------------------------------------------------------------------------------------------------------…
VIT_203s0088g00510.1 ------------------------------------------------------------------------------------------------------------------------------------------------------------------------------------------------------------------------------------------------------------------------------------------------------------------------------------------------------------------------------------------…
VIT_203s0088g00550.1 ------------------------------------------------------------------------------------------------------------------------------------------------------------------------------------------------------------------------------------------------------------------------------------------------------------------------------------------------------------------------------------------…
VIT_203s0088g00590.1 ------------------------------------------------------------------------------------------------------------------------------------------------------------------------------------------------------------------------------------------------------------------------------------------------------------------------------------------------------------------------------------------…
VIT_203s0088g00600.1 ------------------------------------------------------------------------------------------------------------------------------------------------------------------------------------------------------------------------------------------------------------------------------------------------------------------------------------------------------------------------------------------…
VIT_203s0088g00610.1 ------------------------------------------------------------------------------------------------------------------------------------------------------------------------------------------------------------------------------------------------------------------------------------------------------------------------------------------------------------------------------------------…
VIT_203s0097g00160.2 ------------------------------------------------------------------------------------------------------------------------------------------------------------------------------------------------------------------------------------------------------------------------------------------------------------------------------------------------------------------------------------------…
VIT_203s0167g00100.1 ----------------------------------------------------------------------------------------------------------------------------------------------------------------------------------------------------------------------------------------------------------------------------------------------------------------------------------------------------------------MSYLW---------------------…
VIT_204s0008g01980.1 ------------------------------------------------------------------------------------------------------------------------------------------------------------------------------------------------------------------------------------------------------------------------------------------------------------------------------------------------------------------------------------------…
VIT_205s0020g01043.1 ------------------------------------------------------------------------------------------------------------------------------------------------------------------------------------------------------------------------------------------------------------------------------------------------------------------------------------------------------------------------------------------…
VIT_205s0020g01046.1 ------------------------------------------------------------------------------------------------------------------------------------------------------------------------------------------------------------------------------------------------------------------------------------------------------------------------------------------------------------------------------------------…
VIT_205s0020g01055.1 ----------------MAR-----------------------------------------------------------------------------------------------------------K---------------------------------------------------------------------------------------------------------------------------------------------KV-QLQW-------------------------------------------------------------------------------------------------------…
VIT_205s0049g01465.1 ------------------------------------------------------------------------------------------------------------------------------------------------------------------------------------------------------------------------------------------------------------------------------------------------------------------------------------------------------------------------------------------…
VIT_207s0005g06590.1 ------------------------------------------------------------------------------------------------------------------------------------------------------------------------------------------------------------------------------------------------------------------------------------------------------------------------------------------------------------------------------------------…
VIT_207s0031g01140.1 ------------------------------------------------------------------------------------------------------------------------------------------------------------------------------------------------------------------------------------------------------------------------------------------------------------------------------------------------------------------------------------------…
VIT_207s0129g00650.1 ------------------------------------------------------------------------------------------------------------------------------------------------------------------------------------------------------------------------------------------------------------------------------------------------------------------------------------------------------------------------------------------…
VIT_208s0032g00974.1 ------------------------------------------------------------------------------------------------------------------------------------------------------------------------------------------------------------------------------------------------------------------------------------------------------------------------------------------------------------------------------------------…
VIT_210s0003g03015.1 ------------------------------------------------------------------------------------------------------------------------------------------------------------------------------------------------------------------------------------------------------------------------------------------------------------------------------------------------------------------------------------------…
VIT_210s0003g03020.1 ------------------------------------------------------------------------------------------------------------------------------------------------------------------------------------------------------------------------------------------------------------------------------------------------------------------------------------------------------------------------------------------…
VIT_210s0003g03025.1 ------------------------------------------------------------------------------------------------------------------------------------------------------------------------------------------------------------------------------------------------------------------------------------------------------------------------------------------------------------------------------------------…
VIT_210s0003g03970.1 ------------------------------------------------------------------------------------------------------------------------------------------------------------------------------------------------------------------------------------------------------------------------------------------------------------------------------------------------------------------------------------------…
VIT_212s0059g02675.1 ------------------------------------------------------------------------------------------------------------------------------------------------------------------------------------------------------------------------------------------------------------------------------------------------------------------------------------------------------------------------------------------…
VIT_213s0019g05285.1 ------------------------------------------------------------------------------------------------------------------------------------------------------------------------------------------------------------------------------------------------------------------------------------------------------------------------------------------------------------------------------------------…
VIT_213s0074g00182.1 ------------------------------------------------------------------------------------------------------------------------------------------------------------------------------------------------------------------------------------------------------------------------------------------------------------------------------------------------------------------------------------------…
VIT_214s0060g00300.1 ------------------------------------------------------------------------------------------------------------------------------------------------------------------------------------------------------------------------------------------------------------------------------------------------------------------------------------------------------------------------------------------…
VIT_214s0068g01800.1 ------------------------------------------------------------------------------------------------------------------------------------------------------------------------------------------------------------------------------------------------------------------------------------------------------------------------------------------------------------------------------------------…
VIT_215s0021g00560.1 ------------------------------------------------------------------------------------------------------------------------------------------------------------------------------------------------------------------------------------------------------------------------------------------------------------------------------------------------------------------------------------------…
VIT_215s0021g02220.1 ------------------------------------------------------------------------------------------------------------------------------------------------------------------------------------------------------------------------------------------------------------------------------------------------------------------------------------------------------------------------------------------…
VIT_215s0021g02250.1 ------------------------------------------------------------------------------------------------------------------------------------------------------------------------------------------------------------------------------------------------------------------------------------------------------------------------------------------------------------------------------------------…
VIT_215s0024g01860.1 ------------------------------------------------------------------------------------------------------------------------------------------------------------------------------------------------------------------------------------------------------------------------------------------------------------------------------------------------------------------------------------------…
VIT_215s0024g02000.1 ------------------------------------------------------------------------------------------------------------------------------------------------------------------------------------------------------------------------------------------------------------------------------------------------------------------------------------------------------------------------------------------…
VIT_215s0048g00485.1 ------------------------------------------------------------------------------------------------------------------------------------------------------------------------------------------------------------------------------------------------------------------------------------------------------------------------------------------------------------------------------------------…
VIT_215s0048g00495.1 ------------------------------------------------------------------------------------------------------------------------------------------------------------------------------------------------------------------------------------------------------------------------------------------------------------------------------------------------------------------------------------------…
VIT_215s0048g01240.1 ------------------------------------------------------------------------------------------------------------------------------------------------------------------------------------------------------------------------------------------------------------------------------------------------------------------------------------------------------------------------------------------…
VIT_216s0022g02400.4 ------------------------------------------------------------------------------------------------------------------------------------------------------------------------------------------------------------------------------------------------------------------------------------------------------------------------------------------------------------------------------------------…
VIT_217s0000g06340.2 ------------------------------------------------------------------------------------------------------------------------------------------------------------------------------------------------------------------------------------------------------------------------------------------------------------------------------------------------------------------------------------------…
VIT_217s0000g07135.1 ------------------------------------------------------------------------------------------------------------------------------------------------------------------------------------------------------------------------------------------------------------------------------------------------------------------------------------------------------------------------------------------…
VIT_217s0000g08445.1 ------------------------------------------------------------------------------------------------------------------------------------------------------------------------------------------------------------------------------------------------------------------------------------------------------------------------------------------------------------------------------------------…
VIT_218s0001g04810.1 ------------------------------------------------------------------------------------------------------------------------------------------------------------------------------------------------------------------------------------------------------------------------------------------------------------------------------------------------------------------------------------------…
VIT_219s0014g00310.1 ------------------------------------------------------------------------------------------------------------------------------------------------------------------------------------------------------------------------------------------------------------------------------------------------------------------------------------------------------------------------------------------…
SHI01397-RA ----------------MNGFL---------------FFI-----------------------------------------YFISNIWH-----------------------------------------------------------------------------------------------------------------------------------------------------------------------------------------LQG----------------------------------------------------------------------------SPFSSFFCI--------------------------…
SHI06664-RA ---------------------------------------------------------------------------------------------------------------------------------------------------------------------------------------------------------------------------------------------------------------------------------------------------------------------------------------------------------------------------------------------------…
SHI08996-RA ---------------------------------------------------------------------------------------------------------------------------------------------------------------------------------------------------------------------------------------------------------------------------------------------------------------------------------------------------------------------------------------------------…
SHI09220-RA ---------------------------------------------------------------------------------------------------------------------------------------------------------------------------------------------------------------------------------------------------------------------------------------------------------------------------------------------------------------------------------------------------…
SHI20564-RA ---------------------------------------------------------------------------------------------------------------------------------------------------------------------------------------------------------------------------------------------------------------------------------------------------------------------------------------------------------------------------------------------------…
SHI06656-RA ---------------------------------------------------------------------------------------------------------------------------------------------------------------------------------------------------------------------------------------------------------------------------------------------------------------------------------------------------------------------------------------------------…
SHI08588-RA ---------------------------------------------------------------------------------------------------------------------------------------------------------------------------------------------------------------------------------------------------------------------------------------------------------------------------------------------------------------------------------------------------…
SHI17451-RA ---------------------------------------------------------------------------------------------------------------------------------------------------------------------------------------------------------------------------------------------------------------------------------------------------------------------------------------------------------------------------------------------------…
SHI20556-RA ---------------------------------------------------------------------------------------------------------------------------------------------------------------------------------------------------------------------------------------------------------------------------------------------------------------------------------------------------------------------------------------------------…
SHI31069-RA ---------------------------------------------------------------------------------------------------------------------------------------------------------------------------------------------------------------------------------------------------------------------------------------------------------------------------------------------------------------------------------------------------…
SHI00087-RA ---------------------------------------------------------------------------------------------------------------------------------------------------------------------------------------------------------------------------------------------------------------------------------------------------------------------------------------------------------------------------------------------------…
SHI00129-RA ---------------------------------------------------------------------------------------------------------------------------------------------------------------------------------------------------------------------------------------------------------------------------------ML----------------------------------------------------------------------------------------------------------------…
SHI05162-RA ---------------------------------------------------------------------------------------------------------------------------------------------------------------------------------------------------------------------------------------------------------------------------------------------------------------------------------------------------------------------------------------------------…
SHI08685-RA ---------------------------------------------------------------------------------------------------------------------------------------------------------------------------------------------------------------------------------------------------------------------------------------------------------------------------------------------------------------------------------------------------…
SHI09696-RA ---------------------------------------------------------------------------------------------------------------------------------------------------------------------------------------------------------------------------------------------------------------------------------------------------------------------------------------------------------------------------------------------------…
SHI11612-RA ---------------------------------------------------------------------------------------------------------------------------------------------------------------------------------------------------------------------------------------------------------------------------------------------------------------------------------------------------------------------------------------------------…
SHI33749-RA ---------------------------------------------------------------------------------------------------------------------------------------------------------------------------------------------------------------------------------------------------------------------------------------------------------------------------------------------------------------------------------------------------…
SHI00086-RA ---------------------------------------------------------------------------------------------------------------------------------------------------------------------------------------------------------------------------------------------------------------------------------MV----------------------------------------------------------------------------------------------------------------…
SHI06116-RA --------------------------------------------------------------------------------------------------------------------------------------------------------------------------------------------------------------------------------------------------------------------------------MSM-----------------------------------------------------------------------------AGFLSRELV--------------------------…
SHI07318-RA ----------------MRA-----------------------------------------------------------------------------------------------------------S---------------------------------------------------------------------------------------------------------------------------------------------A----------------------------------------------------------------------------------------------------------------------…
SHI07325-RA ---------------------------------------------------------------------------------------------------------------------------------------------------------------------------------------------------------------------------------------------------------------------------------------------------------------------------------------------------------------------------------------------------…
SHI21805-RA ---------------------------------------------------------------------------------------------------------------------------------------------------------------------------------------------------------------------------------------------------------------------------------------------------------------------------------------------------------------------------------------------------…
SHI22608-RA ---------------------------------------------------------------------------------------------------------------------------------------------------------------------------------------------------------------------------------------------------------------------------------------------------------------------------------------------------------------------------------------------------…
SHI28290-RA ---------------------------------------------------------------------------------------------------------------------------------------------------------------------------------------------------------------------------------------------------------------------------------------------------------------------------------------------------------------------------------------------------…
SHI42934-RA ---------------------------------------------------------------------------------------------------------------------------------------------------------------------------------------------------------------------------------------------------------------------------------------------------------------------------------------------------------------------------------------------------…
C002N0575E0.1 -------------------------------------------------------------------------------------------------------------------------------------------------------------------------------------------------------------------------------------------------------------------------------------------------------------------------------------------------------------------------------------------------…
C003N0164E0.1 -------------------------------------------------------------------------------------------------------------------------------------------------------------------------------------------------------------------------------------------------------------------------------------------------------------------------------------------------------------------------------------------------…
C004N0075E0.1 -------------------------------------------------------------------------------------------------------------------------------------------------------------------------------------------------------------------------------------------------------------------------------------------------------------------------------------------------------------------------------------------------…
C004N0076E0.1 -------------------------------------------------------------------------------------------------------------------------------------------------------------------------------------------------------------------------------------------------------------------------------------------------------------------------------------------------------------------------------------------------…
C004N0461E0.1 -------------------------------------------------------------------------------------------------------------------------------------------------------------------------------------------------------------------------------------------------------------------------------------------------------------------------------------------------------------------------------------------------…
C006N0111M0.1 -------------------------------------------------------------------------------------------------------------------------------------------------------------------------------------------------------------------------------------------------------------------------------------------------------------------------------------------------------------------------------------------------…
C006N0120E0.1 -------------------------------------------------------------------------------------------------------------------------------------------------------------------------------------------------------------------------------------------------------------------------------------------------------------------------------------------------------------------------------------------------…
C006N0580E0.1 -------------------------------------------------------------------------------------------------------------------------------------------------------------------------------------------------------------------------------------------------------------------------------------------------------------------------------------------------------------------------------------------------…
C006N0581E0.1 -------------------------------------------------------------------------------------------------------------------------------------------------------------------------------------------------------------------------------------------------------------------------------------------------------------------------------------------------------------------------------------------------…
C007N0451M0.1 -------------------------------------------------------------------------------------------------------------------------------------------------------------------------------------------------------------------------------------------------------------------------------------------------------------------------------------------------------------------------------------------------…
C008N0131E0.1 -------------------------------------------------------------------------------------------------------------------------------------------------------------------------------------------------------------------------------------------------------------------------------------------------------------------------------------------------------------------------------------------------…
C009N0309M0.1 -------------------------------------------------------------------------------------------------------------------------------------------------------------------------------------------------------------------------------------------------------------------------------------------------------------------------------------------------------------------------------------------------…
C009N0448E0.1 -------------------------------------------------------------------------------------------------------------------------------------------------------------------------------------------------------------------------------------------------------------------------------------------------------------------------------------------------------------------------------------------------…
C011N0393M0.1 -------------------------------------------------------------------------------------------------------------------------------------------------------------------------------------------------------------------------------------------------------------------------------------------------------------------------------------------------------------------------------------------------…
C011N0418G0.1 -------------------------------------------------------------------------------------------------------------------------------------------------------------------------------------------------------------------------------------------------------------------------------------------------------------------------------------------------------------------------------------------------…
C011N0562M0.1 -------------------------------------------------------------------------------------------------------------------------------------------------------------------------------------------------------------------------------------------------------------------------------------------------------------------------------------------------------------------------------------------------…
C013N0366E0.1 -------------------------------------------------------------------------------------------------------------------------------------------------------------------------------------------------------------------------------------------------------------------------------------------------------------------------------------------------------------------------------------------------…
C014N0030M0.1 -------------------------------------------------------------------------------------------------------------------------------------------------------------------------------------------------------------------------------------------------------------------------------------------------------------------------------------------------------------------------------------------------…
C014N0079E0.1 -------------------------------------------------------------------------------------------------------------------------------------------------------------------------------------------------------------------------------------------------------------------------------------------------------------------------------------------------------------------------------------------------…
C014N0383E0.1 -------------------------------------------------------------------------------------------------------------------------------------------------------------------------------------------------------------------------------------------------------------------------------------------------------------------------------------------------------------------------------------------------…
C016N0183E0.1 -------------------------------------------------------------------------------------------------------------------------------------------------------------------------------------------------------------------------------------------------------------------------------------------------------------------------------------------------------------------------------------------------…
C022N0293E0.1 -------------------------------------------------------------------------------------------------------------------------------------------------------------------------------------------------------------------------------------------------------------------------------------------------------------------------------------------------------------------------------------------------…
C024N0015E0.1 -------------------------------------------------------------------------------------------------------------------------------------------------------------------------------------------------------------------------------------------------------------------------------------------------------------------------------------------------------------------------------------------------…
C026N0449M0.1 -------------------------------------------------------------------------------------------------------------------------------------------------------------------------------------------------------------------------------------------------------------------------------------------------------------------------------------------------------------------------------------------------…
C028N0110M0.1 -------------------------------------------------------------------------------------------------------------------------------------------------------------------------------------------------------------------------------------------------------------------------------------------------------------------------------------------------------------------------------------------------…
C041N0257E0.1 -------------------------------------------------------------------------------------------------------------------------------------------------------------------------------------------------------------------------------------------------------------------------------------------------------------------------------------------------------------------------------------------------…
C052N0065E0.1 -------------------------------------------------------------------------------------------------------------------------------------------------------------------------------------------------------------------------------------------------------------------------------------------------------------------------------------------------------------------------------------------------…
C067N0023E0.1 -------------------------------------------------------------------------------------------------------------------------------------------------------------------------------------------------------------------------------------------------------------------------------------------------------------------------------------------------------------------------------------------------…
C072N0033E0.1 -------------------------------------------------------------------------------------------------------------------------------------------------------------------------------------------------------------------------------------------------------------------------------------------------------------------------------------------------------------------------------------------------…
C074N0098E0.1 -------------------------------------------------------------------------------------------------------------------------------------------------------------------------------------------------------------------------------------------------------------------------------------------------------------------------------------------------------------------------------------------------…
C074N0099E0.1 -------------------------------------------------------------------------------------------------------------------------------------------------------------------------------------------------------------------------------------------------------------------------------------------------------------------------------------------------------------------------------------------------…
C102N0054E0.1 -------------------------------------------------------------------------------------------------------------------------------------------------------------------------------------------------------------------------------------------------------------------------------------------------------------------------------------------------------------------------------------------------…
C117N0013E0.1 -------------------------------------------------------------------------------------------------------------------------------------------------------------------------------------------------------------------------------------------------------------------------------------------------------------------------------------------------------------------------------------------------…
INIL01g05020.t1 -----------------------------------------------------------------------------------------------------------------------------------------------------------------------------------------------------------------------------------------------------------------------------------------------------------------------------------------------------------------------------------------------…
INIL01g15941.t1 -----------------------------------------------------------------------------------------------------------------------------------------------------------------------------------------------------------------------------------------------------------------------------------------------------------------------------------------------------------------------------------------------…
INIL01g15946.t1 -----------------------------------------------------------------------------------------------------------------------------------------------------------------------------------------------------------------------------------------------------------------------------------------------------------------------------------------------------------------------------------------------…
INIL01g19676.t1 -----------------------------------------------------------------------------------------------------------------------------------------------------------------------------------------------------------------------------------------------------------------------------------------------------------------------------------------------------------------------------------------------…
INIL01g19678.t1 -----------------------------------------------------------------------------------------------------------------------------------------------------------------------------------------------------------------------------------------------------------------------------------------------------------------------------------------------------------------------------------------------…
INIL01g25143.t1 -----------------------------------------------------------------------------------------------------------------------------------------------------------------------------------------------------------------------------------------------------------------------------------------------------------------------------------------------------------------------------------------------…
INIL01g25289.t1 -----------------------------------------------------------------------------------------------------------------------------------------------------------------------------------------------------------------------------------------------------------------------------------------------------------------------------------------------------------------------------------------------…
INIL01g25374.t1 -----------------------------------------------------------------------------------------------------------------------------------------------------------------------------------------------------------------------------------------------------------------------------------------------------------------------------------------------------------------------------------------------…
INIL01g36557.t1 -----------------------------------------------------------------------------------------------------------------------------------------------------------------------------------------------------------------------------------------------------------------------------------------------------------------------------------------------------------------------------------------------…
INIL02g10677.t1 -----------------------------------------------------------------------------------------------------------------------------------------------------------------------------------------------------------------------------------------------------------------------------------------------------------------------------------------------------------------------------------------------…
INIL02g10678.t1 -----------------------------------------------------------------------------------------------------------------------------------------------------------------------------------------------------------------------------------------------------------------------------------------------------------------------------------------------------------------------------------------------…
INIL02g11715.t1 -----------------------------------------------------------------------------------------------------------------------------------------------------------------------------------------------------------------------------------------------------------------------------------------------------------------------------------------------------------------------------------------------…
INIL02g11869.t1 -----------------------------------------------------------------------------------------------------------------------------------------------------------------------------------------------------------------------------------------------------------------------------------------------------------------------------------------------------------------------------------------------…
INIL02g17189.t1 -----------------------------------------------------------------------------------------------------------------------------------------------------------------------------------------------------------------------------------------------------------------------------------------------------------------------------------------------------------------------------------------------…
INIL02g40649.t1 -----------------------------------------------------------------------------------------------------------------------------------------------------------------------------------------------------------------------------------------------------------------------------------------------------------------------------------------------------------------------------------------------…
INIL03g11422.t1 -----------------------------------------------------------------------------------------------------------------------------------------------------------------------------------------------------------------------------------------------------------------------------------------------------------------------------------------------------------------------------------------------…
INIL03g11424.t1 -----------------------------------------------------------------------------------------------------------------------------------------------------------------------------------------------------------------------------------------------------------------------------------------------------------------------------------------------------------------------------------------------…
INIL03g11425.t1 -----------------------------------------------------------------------------------------------------------------------------------------------------------------------------------------------------------------------------------------------------------------------------------------------------------------------------------------------------------------------------------------------…
INIL03g11426.t1 -----------------------------------------------------------------------------------------------------------------------------------------------------------------------------------------------------------------------------------------------------------------------------------------------------------------------------------------------------------------------------------------------…
INIL03g11427.t1 -----------------------------------------------------------------------------------------------------------------------------------------------------------------------------------------------------------------------------------------------------------------------------------------------------------------------------------------------------------------------------------------------…
INIL03g11428.t1 -----------------------------------------------------------------------------------------------------------------------------------------------------------------------------------------------------------------------------------------------------------------------------------------------------------------------------------------------------------------------------------------------…
INIL03g11430.t1 -----------------------------------------------------------------------------------------------------------------------------------------------------------------------------------------------------------------------------------------------------------------------------------------------------------------------------------------------------------------------------------------------…
INIL03g11432.t1 -----------------------------------------------------------------------------------------------------------------------------------------------------------------------------------------------------------------------------------------------------------------------------------------------------------------------------------------------------------------------------------------------…
INIL03g11434.t1 -----------------------------------------------------------------------------------------------------------------------------------------------------------------------------------------------------------------------------------------------------------------------------------------------------------------------------------------------------------------------------------------------…
INIL03g14975.t1 -----------------------------------------------------------------------------------------------------------------------------------------------------------------------------------------------------------------------------------------------------------------------------------------------------------------------------------------------------------------------------------------------…
INIL03g17314.t1 -----------------------------------------------------------------------------------------------------------------------------------------------------------------------------------------------------------------------------------------------------------------------------------------------------------------------------------------------------------------------------------------------…
INIL03g17580.t1 -----------------------------------------------------------------------------------------------------------------------------------------------------------------------------------------------------------------------------------------------------------------------------------------------------------------------------------------------------------------------------------------------…
INIL03g17583.t1 -----------------------------------------------------------------------------------------------------------------------------------------------------------------------------------------------------------------------------------------------------------------------------------------------------------------------------------------------------------------------------------------------…
INIL03g17609.t1 -----------------------------------------------------------------------------------------------------------------------------------------------------------------------------------------------------------------------------------------------------------------------------------------------------------------------------------------------------------------------------------------------…
INIL03g22473.t1 -----------------------------------------------------------------------------------------------------------------------------------------------------------------------------------------------------------------------------------------------------------------------------------------------------------------------------------------------------------------------------------------------…
INIL03g22474.t1 -----------------------------------------------------------------------------------------------------------------------------------------------------------------------------------------------------------------------------------------------------------------------------------------------------------------------------------------------------------------------------------------------…
INIL04g02328.t1 -----------------------------------------------------------------------------------------------------------------------------------------------------------------------------------------------------------------------------------------------------------------------------------------------------------------------------------------------------------------------------------------------…
INIL04g02386.t1 -----------------------------------------------------------------------------------------------------------------------------------------------------------------------------------------------------------------------------------------------------------------------------------------------------------------------------------------------------------------------------------------------…
INIL04g02392.t1 -----------------------------------------------------------------------------------------------------------------------------------------------------------------------------------------------------------------------------------------------------------------------------------------------------------------------------------------------------------------------------------------------…
INIL04g34972.t1 -----------------------------------------------------------------------------------------------------------------------------------------------------------------------------------------------------------------------------------------------------------------------------------------------------------------------------------------------------------------------------------------------…
INIL05g02142.t1 -----------------------------------------------------------------------------------------------------------------------------------------------------------------------------------------------------------------------------------------------------------------------------------------------------------------------------------------------------------------------------------------------…
INIL05g09362.t1 -----------------------------------------------------------------------------------------------------------------------------------------------------------------------------------------------------------------------------------------------------------------------------------------------------------------------------------------------------------------------------------------------…
INIL06g37292.t1 -----------------------------------------------------------------------------------------------------------------------------------------------------------------------------------------------------------------------------------------------------------------------------------------------------------------------------------------------------------------------------------------------…
INIL06g37567.t1 -----------------------------------------------------------------------------------------------------------------------------------------------------------------------------------------------------------------------------------------------------------------------------------------------------------------------------------------------------------------------------------------------…
INIL06g37823.t1 -----------------------------------------------------------------------------------------------------------------------------------------------------------------------------------------------------------------------------------------------------------------------------------------------------------------------------------------------------------------------------------------------…
INIL06g38202.t1 -----------------------------------------------------------------------------------------------------------------------------------------------------------------------------------------------------------------------------------------------------------------------------------------------------------------------------------------------------------------------------------------------…
INIL06g38203.t1 -----------------------------------------------------------------------------------------------------------------------------------------------------------------------------------------------------------------------------------------------------------------------------------------------------------------------------------------------------------------------------------------------…
INIL07g06020.t1 -----------------------------------------------------------------------------------------------------------------------------------------------------------------------------------------------------------------------------------------------------------------------------------------------------------------------------------------------------------------------------------------------…
INIL07g06021.t1 -----------------------------------------------------------------------------------------------------------------------------------------------------------------------------------------------------------------------------------------------------------------------------------------------------------------------------------------------------------------------------------------------…
INIL07g06027.t1 -----------------------------------------------------------------------------------------------------------------------------------------------------------------------------------------------------------------------------------------------------------------------------------------------------------------------------------------------------------------------------------------------…
INIL08g04815.t1 -----------------------------------------------------------------------------------------------------------------------------------------------------------------------------------------------------------------------------------------------------------------------------------------------------------------------------------------------------------------------------------------------…
INIL08g04824.t1 -----------------------------------------------------------------------------------------------------------------------------------------------------------------------------------------------------------------------------------------------------------------------------------------------------------------------------------------------------------------------------------------------…
INIL08g23204.t1 -----------------------------------------------------------------------------------------------------------------------------------------------------------------------------------------------------------------------------------------------------------------------------------------------------------------------------------------------------------------------------------------------…
INIL08g38549.t1 -----------------------------------------------------------------------------------------------------------------------------------------------------------------------------------------------------------------------------------------------------------------------------------------------------------------------------------------------------------------------------------------------…
INIL09g30017.t1 -----------------------------------------------------------------------------------------------------------------------------------------------------------------------------------------------------------------------------------------------------------------------------------------------------------------------------------------------------------------------------------------------…
INIL09g30018.t1 -----------------------------------------------------------------------------------------------------------------------------------------------------------------------------------------------------------------------------------------------------------------------------------------------------------------------------------------------------------------------------------------------…
INIL09g31419.t1 -----------------------------------------------------------------------------------------------------------------------------------------------------------------------------------------------------------------------------------------------------------------------------------------------------------------------------------------------------------------------------------------------…
INIL09g33285.t1 -----------------------------------------------------------------------------------------------------------------------------------------------------------------------------------------------------------------------------------------------------------------------------------------------------------------------------------------------------------------------------------------------…
INIL09g35955.t1 -----------------------------------------------------------------------------------------------------------------------------------------------------------------------------------------------------------------------------------------------------------------------------------------------------------------------------------------------------------------------------------------------…
INIL11g22431.t1 -----------------------------------------------------------------------------------------------------------------------------------------------------------------------------------------------------------------------------------------------------------------------------------------------------------------------------------------------------------------------------------------------…
INIL11g22433.t1 -----------------------------------------------------------------------------------------------------------------------------------------------------------------------------------------------------------------------------------------------------------------------------------------------------------------------------------------------------------------------------------------------…
INIL11g26630.t1 -----------------------------------------------------------------------------------------------------------------------------------------------------------------------------------------------------------------------------------------------------------------------------------------------------------------------------------------------------------------------------------------------…
INIL12g01106.t1 -----------------------------------------------------------------------------------------------------------------------------------------------------------------------------------------------------------------------------------------------------------------------------------------------------------------------------------------------------------------------------------------------…
INIL12g01160.t1 -----------------------------------------------------------------------------------------------------------------------------------------------------------------------------------------------------------------------------------------------------------------------------------------------------------------------------------------------------------------------------------------------…
INIL12g01448.t1 -----------------------------------------------------------------------------------------------------------------------------------------------------------------------------------------------------------------------------------------------------------------------------------------------------------------------------------------------------------------------------------------------…
INIL12g24881.t1 -----------------------------------------------------------------------------------------------------------------------------------------------------------------------------------------------------------------------------------------------------------------------------------------------------------------------------------------------------------------------------------------------…
INIL13g07818.t1 -----------------------------------------------------------------------------------------------------------------------------------------------------------------------------------------------------------------------------------------------------------------------------------------------------------------------------------------------------------------------------------------------…
INIL13g08257.t1 -----------------------------------------------------------------------------------------------------------------------------------------------------------------------------------------------------------------------------------------------------------------------------------------------------------------------------------------------------------------------------------------------…
INIL13g08258.t1 -----------------------------------------------------------------------------------------------------------------------------------------------------------------------------------------------------------------------------------------------------------------------------------------------------------------------------------------------------------------------------------------------…
INIL13g09292.t1 -----------------------------------------------------------------------------------------------------------------------------------------------------------------------------------------------------------------------------------------------------------------------------------------------------------------------------------------------------------------------------------------------…
INIL13g10970.t1 -----------------------------------------------------------------------------------------------------------------------------------------------------------------------------------------------------------------------------------------------------------------------------------------------------------------------------------------------------------------------------------------------…
INIL14g03750.t1 -----------------------------------------------------------------------------------------------------------------------------------------------------------------------------------------------------------------------------------------------------------------------------------------------------------------------------------------------------------------------------------------------…
INIL14g03769.t1 -----------------------------------------------------------------------------------------------------------------------------------------------------------------------------------------------------------------------------------------------------------------------------------------------------------------------------------------------------------------------------------------------…
INIL14g03781.t1 -----------------------------------------------------------------------------------------------------------------------------------------------------------------------------------------------------------------------------------------------------------------------------------------------------------------------------------------------------------------------------------------------…
INIL14g06731.t1 -----------------------------------------------------------------------------------------------------------------------------------------------------------------------------------------------------------------------------------------------------------------------------------------------------------------------------------------------------------------------------------------------…
INIL14g06732.t1 -----------------------------------------------------------------------------------------------------------------------------------------------------------------------------------------------------------------------------------------------------------------------------------------------------------------------------------------------------------------------------------------------…
INIL14g06733.t1 -----------------------------------------------------------------------------------------------------------------------------------------------------------------------------------------------------------------------------------------------------------------------------------------------------------------------------------------------------------------------------------------------…
INIL14g06734.t1 -----------------------------------------------------------------------------------------------------------------------------------------------------------------------------------------------------------------------------------------------------------------------------------------------------------------------------------------------------------------------------------------------…
INIL14g06735.t1 -----------------------------------------------------------------------------------------------------------------------------------------------------------------------------------------------------------------------------------------------------------------------------------------------------------------------------------------------------------------------------------------------…
INIL14g06737.t1 -----------------------------------------------------------------------------------------------------------------------------------------------------------------------------------------------------------------------------------------------------------------------------------------------------------------------------------------------------------------------------------------------…
INIL14g21273.t1 -----------------------------------------------------------------------------------------------------------------------------------------------------------------------------------------------------------------------------------------------------------------------------------------------------------------------------------------------------------------------------------------------…
INIL14g21274.t1 -----------------------------------------------------------------------------------------------------------------------------------------------------------------------------------------------------------------------------------------------------------------------------------------------------------------------------------------------------------------------------------------------…
INIL14g21275.t1 -----------------------------------------------------------------------------------------------------------------------------------------------------------------------------------------------------------------------------------------------------------------------------------------------------------------------------------------------------------------------------------------------…
INIL14g21281.t1 -----------------------------------------------------------------------------------------------------------------------------------------------------------------------------------------------------------------------------------------------------------------------------------------------------------------------------------------------------------------------------------------------…
INIL14g21282.t1 -----------------------------------------------------------------------------------------------------------------------------------------------------------------------------------------------------------------------------------------------------------------------------------------------------------------------------------------------------------------------------------------------…
INIL14g35101.t1 -----------------------------------------------------------------------------------------------------------------------------------------------------------------------------------------------------------------------------------------------------------------------------------------------------------------------------------------------------------------------------------------------…
INIL14g35204.t1 -----------------------------------------------------------------------------------------------------------------------------------------------------------------------------------------------------------------------------------------------------------------------------------------------------------------------------------------------------------------------------------------------…
INIL14g41600.t1 -----------------------------------------------------------------------------------------------------------------------------------------------------------------------------------------------------------------------------------------------------------------------------------------------------------------------------------------------------------------------------------------------…
INIL14g41853.t1 -----------------------------------------------------------------------------------------------------------------------------------------------------------------------------------------------------------------------------------------------------------------------------------------------------------------------------------------------------------------------------------------------…
INIL15g27555.t1 -----------------------------------------------------------------------------------------------------------------------------------------------------------------------------------------------------------------------------------------------------------------------------------------------------------------------------------------------------------------------------------------------…
INIL15g27657.t1 -----------------------------------------------------------------------------------------------------------------------------------------------------------------------------------------------------------------------------------------------------------------------------------------------------------------------------------------------------------------------------------------------…
INIL15g27814.t1 -----------------------------------------------------------------------------------------------------------------------------------------------------------------------------------------------------------------------------------------------------------------------------------------------------------------------------------------------------------------------------------------------…
INIL15g27816.t1 -----------------------------------------------------------------------------------------------------------------------------------------------------------------------------------------------------------------------------------------------------------------------------------------------------------------------------------------------------------------------------------------------…
INIL15g27817.t1 -----------------------------------------------------------------------------------------------------------------------------------------------------------------------------------------------------------------------------------------------------------------------------------------------------------------------------------------------------------------------------------------------…
INIL15g28129.t1 -----------------------------------------------------------------------------------------------------------------------------------------------------------------------------------------------------------------------------------------------------------------------------------------------------------------------------------------------------------------------------------------------…
INIL15g39087.t1 -----------------------------------------------------------------------------------------------------------------------------------------------------------------------------------------------------------------------------------------------------------------------------------------------------------------------------------------------------------------------------------------------…
INIL15g39088.t1 -----------------------------------------------------------------------------------------------------------------------------------------------------------------------------------------------------------------------------------------------------------------------------------------------------------------------------------------------------------------------------------------------…
INIL15g39089.t1 -----------------------------------------------------------------------------------------------------------------------------------------------------------------------------------------------------------------------------------------------------------------------------------------------------------------------------------------------------------------------------------------------…
Migut.A00326.1.p ----------------------------------------------------------------------------------------------------------------------------------------------------------------------------------------------------------------------------------------------------------------------------------------------------------------------------------------------------------------------------------------------…
Migut.A00406.1.p ----------------------------------------------------------------------------------------------------------------------------------------------------------------------------------------------------------------------------------------------------------------------------------------------------------------------------------------------------------------------------------------------…
Migut.A00408.1.p ----------------------------------------------------------------------------------------------------------------------------------------------------------------------------------------------------------------------------------------------------------------------------------------------------------------------------------------------------------------------------------------------…
Migut.A00649.1.p ----------------------------------------------------------------------------------------------------------------------------------------------------------------------------------------------------------------------------------------------------------------------------------------------------------------------------------------------------------------------------------------------…
Migut.A00653.1.p ----------------------------------------------------------------------------------------------------------------------------------------------------------------------------------------------------------------------------------------------------------------------------------------------------------------------------------------------------------------------------------------------…
Migut.A00654.1.p ----------------------------------------------------------------------------------------------------------------------------------------------------------------------------------------------------------------------------------------------------------------------------------------------------------------------------------------------------------------------------------------------…
Migut.A00897.1.p ----------------------------------------------------------------------------------------------------------------------------------------------------------------------------------------------------------------------------------------------------------------------------------------------------------------------------------------------------------------------------------------------…
Migut.A00904.1.p ----------------------------------------------------------------------------------------------------------------------------------------------------------------------------------------------------------------------------------------------------------------------------------------------------------------------------------------------------------------------------------------------…
Migut.B00479.1.p ----------------------------------------------------------------------------------------------------------------------------------------------------------------------------------------------------------------------------------------------------------------------------------------------------------------------------------------------------------------------------------------------…
Migut.B00480.1.p ----------------------------------------------------------------------------------------------------------------------------------------------------------------------------------------------------------------------------------------------------------------------------------------------------------------------------------------------------------------------------------------------…
Migut.B00481.1.p ----------------------------------------------------------------------------------------------------------------------------------------------------------------------------------------------------------------------------------------------------------------------------------------------------------------------------------------------------------------------------------------------…
Migut.B00482.1.p ----------------------------------------------------------------------------------------------------------------------------------------------------------------------------------------------------------------------------------------------------------------------------------------------------------------------------------------------------------------------------------------------…
Migut.B00527.1.p ----------------------------------------------------------------------------------------------------------------------------------------------------------------------------------------------------------------------------------------------------------------------------------------------------------------------------------------------------------------------------------------------…
Migut.B00557.1.p ----------------------------------------------------------------------------------------------------------------------------------------------------------------------------------------------------------------------------------------------------------------------------------------------------------------------------------------------------------------------------------------------…
Migut.B00708.1.p ----------------------------------------------------------------------------------------------------------------------------------------------------------------------------------------------------------------------------------------------------------------------------------------------------------------------------------------------------------------------------------------------…
Migut.B00770.1.p ----------------------------------------------------------------------------------------------------------------------------------------------------------------------------------------------------------------------------------------------------------------------------------------------------------------------------------------------------------------------------------------------…
Migut.B00884.1.p ----------------------------------------------------------------------------------------------------------------------------------------------------------------------------------------------------------------------------------------------------------------------------------------------------------------------------------------------------------------------------------------------…
Migut.B01089.1.p ----------------------------------------------------------------------------------------------------------------------------------------------------------------------------------------------------------------------------------------------------------------------------------------------------------------------------------------------------------------------------------------------…
Migut.B01455.1.p ----------------------------------------------------------------------------------------------------------------------------------------------------------------------------------------------------------------------------------------------------------------------------------------------------------------------------------------------------------------------------------------------…
Migut.B01615.1.p ----------------------------------------------------------------------------------------------------------------------------------------------------------------------------------------------------------------------------------------------------------------------------------------------------------------------------------------------------------------------------------------------…
Migut.B01667.1.p ----------------------------------------------------------------------------------------------------------------------------------------------------------------------------------------------------------------------------------------------------------------------------------------------------------------------------------------------------------------------------------------------…
Migut.B01668.1.p ----------------------------------------------------------------------------------------------------------------------------------------------------------------------------------------------------------------------------------------------------------------------------------------------------------------------------------------------------------------------------------------------…
Migut.C00517.1.p ----------------------------------------------------------------------------------------------------------------------------------------------------------------------------------------------------------------------------------------------------------------------------------------------------------------------------------------------------------------------------------------------…
Migut.C00785.1.p ----------------------------------------------------------------------------------------------------------------------------------------------------------------------------------------------------------------------------------------------------------------------------------------------------------------------------------------------------------------------------------------------…
Migut.C01064.1.p ----------------------------------------------------------------------------------------------------------------------------------------------------------------------------------------------------------------------------------------------------------------------------------------------------------------------------------------------------------------------------------------------…
Migut.C01325.1.p ----------------------------------------------------------------------------------------------------------------------------------------------------------------------------------------------------------------------------------------------------------------------------------------------------------------------------------------------------------------------------------------------…
Migut.C01334.1.p ----------------------------------------------------------------------------------------------------------------------------------------------------------------------------------------------------------------------------------------------------------------------------------------------------------------------------------------------------------------------------------------------…
Migut.C01339.1.p ----------------------------------------------------------------------------------------------------------------------------------------------------------------------------------------------------------------------------------------------------------------------------------------------------------------------------------------------------------------------------------------------…
Migut.D01274.1.p ----------------------------------------------------------------------------------------------------------------------------------------------------------------------------------------------------------------------------------------------------------------------------------------------------------------------------------------------------------------------------------------------…
Migut.D01311.1.p ----------------------------------------------------------------------------------------------------------------------------------------------------------------------------------------------------------------------------------------------------------------------------------------------------------------------------------------------------------------------------------------------…
Migut.D01312.1.p ----------------------------------------------------------------------------------------------------------------------------------------------------------------------------------------------------------------------------------------------------------------------------------------------------------------------------------------------------------------------------------------------…
Migut.D01313.1.p ----------------------------------------------------------------------------------------------------------------------------------------------------------------------------------------------------------------------------------------------------------------------------------------------------------------------------------------------------------------------------------------------…
Migut.D01314.1.p ----------------------------------------------------------------------------------------------------------------------------------------------------------------------------------------------------------------------------------------------------------------------------------------------------------------------------------------------------------------------------------------------…
Migut.D01315.1.p ----------------------------------------------------------------------------------------------------------------------------------------------------------------------------------------------------------------------------------------------------------------------------------------------------------------------------------------------------------------------------------------------…
Migut.D01316.1.p ----------------------------------------------------------------------------------------------------------------------------------------------------------------------------------------------------------------------------------------------------------------------------------------------------------------------------------------------------------------------------------------------…
Migut.D01317.1.p ----------------------------------------------------------------------------------------------------------------------------------------------------------------------------------------------------------------------------------------------------------------------------------------------------------------------------------------------------------------------------------------------…
Migut.D01476.1.p ----------------------------------------------------------------------------------------------------------------------------------------------------------------------------------------------------------------------------------------------------------------------------------------------------------------------------------------------------------------------------------------------…
Migut.D01622.1.p ----------------------------------------------------------------------------------------------------------------------------------------------------------------------------------------------------------------------------------------------------------------------------------------------------------------------------------------------------------------------------------------------…
Migut.D02159.1.p ----------------------------------------------------------------------------------------------------------------------------------------------------------------------------------------------------------------------------------------------------------------------------------------------------------------------------------------------------------------------------------------------…
Migut.E00037.1.p ----------------------------------------------------------------------------------------------------------------------------------------------------------------------------------------------------------------------------------------------------------------------------------------------------------------------------------------------------------------------------------------------…
Migut.E01244.1.p ----------------------------------------------------------------------------------------------------------------------------------------------------------------------------------------------------------------------------------------------------------------------------------------------------------------------------------------------------------------------------------------------…
Migut.F00397.1.p ----------------------------------------------------------------------------------------------------------------------------------------------------------------------------------------------------------------------------------------------------------------------------------------------------------------------------------------------------------------------------------------------…
Migut.F01157.1.p ----------------------------------------------------------------------------------------------------------------------------------------------------------------------------------------------------------------------------------------------------------------------------------------------------------------------------------------------------------------------------------------------…
Migut.F01550.1.p ----------------------------------------------------------------------------------------------------------------------------------------------------------------------------------------------------------------------------------------------------------------------------------------------------------------------------------------------------------------------------------------------…
Migut.G00091.1.p ----------------------------------------------------------------------------------------------------------------------------------------------------------------------------------------------------------------------------------------------------------------------------------------------------------------------------------------------------------------------------------------------…
Migut.G00778.1.p ----------------------------------------------------------------------------------------------------------------------------------------------------------------------------------------------------------------------------------------------------------------------------------------------------------------------------------------------------------------------------------------------…
Migut.G01095.1.p ----------------------------------------------------------------------------------------------------------------------------------------------------------------------------------------------------------------------------------------------------------------------------------------------------------------------------------------------------------------------------------------------…
Migut.H00286.1.p ----------------------------------------------------------------------------------------------------------------------------------------------------------------------------------------------------------------------------------------------------------------------------------------------------------------------------------------------------------------------------------------------…
Migut.H00589.1.p ----------------------------------------------------------------------------------------------------------------------------------------------------------------------------------------------------------------------------------------------------------------------------------------------------------------------------------------------------------------------------------------------…
Migut.H00739.1.p ----------------------------------------------------------------------------------------------------------------------------------------------------------------------------------------------------------------------------------------------------------------------------------------------------------------------------------------------------------------------------------------------…
Migut.H01211.1.p ----------------------------------------------------------------------------------------------------------------------------------------------------------------------------------------------------------------------------------------------------------------------------------------------------------------------------------------------------------------------------------------------…
Migut.H01397.1.p ----------------------------------------------------------------------------------------------------------------------------------------------------------------------------------------------------------------------------------------------------------------------------------------------------------------------------------------------------------------------------------------------…
Migut.H02293.1.p ----------------------------------------------------------------------------------------------------------------------------------------------------------------------------------------------------------------------------------------------------------------------------------------------------------------------------------------------------------------------------------------------…
Migut.H02298.1.p ----------------------------------------------------------------------------------------------------------------------------------------------------------------------------------------------------------------------------------------------------------------------------------------------------------------------------------------------------------------------------------------------…
Migut.H02389.1.p ----------------------------------------------------------------------------------------------------------------------------------------------------------------------------------------------------------------------------------------------------------------------------------------------------------------------------------------------------------------------------------------------…
Migut.H02390.1.p ----------------------------------------------------------------------------------------------------------------------------------------------------------------------------------------------------------------------------------------------------------------------------------------------------------------------------------------------------------------------------------------------…
Migut.I00190.1.p ----------------------------------------------------------------------------------------------------------------------------------------------------------------------------------------------------------------------------------------------------------------------------------------------------------------------------------------------------------------------------------------------…
Migut.I00364.1.p ----------------------------------------------------------------------------------------------------------------------------------------------------------------------------------------------------------------------------------------------------------------------------------------------------------------------------------------------------------------------------------------------…
Migut.I00404.1.p ----------------------------------------------------------------------------------------------------------------------------------------------------------------------------------------------------------------------------------------------------------------------------------------------------------------------------------------------------------------------------------------------…
Migut.J01317.1.p ----------------------------------------------------------------------------------------------------------------------------------------------------------------------------------------------------------------------------------------------------------------------------------------------------------------------------------------------------------------------------------------------…
Migut.K00930.1.p ----------------------------------------------------------------------------------------------------------------------------------------------------------------------------------------------------------------------------------------------------------------------------------------------------------------------------------------------------------------------------------------------…
Migut.K00957.1.p ----------------------------------------------------------------------------------------------------------------------------------------------------------------------------------------------------------------------------------------------------------------------------------------------------------------------------------------------------------------------------------------------…
Migut.K00958.1.p ----------------------------------------------------------------------------------------------------------------------------------------------------------------------------------------------------------------------------------------------------------------------------------------------------------------------------------------------------------------------------------------------…
Migut.K00960.1.p ----------------------------------------------------------------------------------------------------------------------------------------------------------------------------------------------------------------------------------------------------------------------------------------------------------------------------------------------------------------------------------------------…
Migut.K00961.2.p ----------------------------------------------------------------------------------------------------------------------------------------------------------------------------------------------------------------------------------------------------------------------------------------------------------------------------------------------------------------------------------------------…
Migut.K00963.1.p ----------------------------------------------------------------------------------------------------------------------------------------------------------------------------------------------------------------------------------------------------------------------------------------------------------------------------------------------------------------------------------------------…
Migut.K00964.1.p ----------------------------------------------------------------------------------------------------------------------------------------------------------------------------------------------------------------------------------------------------------------------------------------------------------------------------------------------------------------------------------------------…
Migut.K00965.1.p ----------------------------------------------------------------------------------------------------------------------------------------------------------------------------------------------------------------------------------------------------------------------------------------------------------------------------------------------------------------------------------------------…
Migut.K00968.1.p ----------------------------------------------------------------------------------------------------------------------------------------------------------------------------------------------------------------------------------------------------------------------------------------------------------------------------------------------------------------------------------------------…
Migut.K00969.5.p ----------------------------------------------------------------------------------------------------------------------------------------------------------------------------------------------------------------------------------------------------------------------------------------------------------------------------------------------------------------------------------------------…
Migut.K00984.1.p ----------------------------------------------------------------------------------------------------------------------------------------------------------------------------------------------------------------------------------------------------------------------------------------------------------------------------------------------------------------------------------------------…
Migut.K00994.1.p ----------------------------------------------------------------------------------------------------------------------------------------------------------------------------------------------------------------------------------------------------------------------------------------------------------------------------------------------------------------------------------------------…
Migut.K00996.1.p ----------------------------------------------------------------------------------------------------------------------------------------------------------------------------------------------------------------------------------------------------------------------------------------------------------------------------------------------------------------------------------------------…
Migut.K01001.1.p ----------------------------------------------------------------------------------------------------------------------------------------------------------------------------------------------------------------------------------------------------------------------------------------------------------------------------------------------------------------------------------------------…
Migut.K01032.1.p ----------------------------------------------------------------------------------------------------------------------------------------------------------------------------------------------------------------------------------------------------------------------------------------------------------------------------------------------------------------------------------------------…
Migut.L00101.1.p ----------------------------------------------------------------------------------------------------------------------------------------------------------------------------------------------------------------------------------------------------------------------------------------------------------------------------------------------------------------------------------------------…
Migut.L00642.1.p ----------------------------------------------------------------------------------------------------------------------------------------------------------------------------------------------------------------------------------------------------------------------------------------------------------------------------------------------------------------------------------------------…
Migut.L00643.1.p ----------------------------------------------------------------------------------------------------------------------------------------------------------------------------------------------------------------------------------------------------------------------------------------------------------------------------------------------------------------------------------------------…
Migut.L00834.1.p ----------------------------------------------------------------------------------------------------------------------------------------------------------------------------------------------------------------------------------------------------------------------------------------------------------------------------------------------------------------------------------------------…
Migut.L00835.1.p ----------------------------------------------------------------------------------------------------------------------------------------------------------------------------------------------------------------------------------------------------------------------------------------------------------------------------------------------------------------------------------------------…
Migut.L01896.1.p ----------------------------------------------------------------------------------------------------------------------------------------------------------------------------------------------------------------------------------------------------------------------------------------------------------------------------------------------------------------------------------------------…
Migut.M00928.1.p ----------------------------------------------------------------------------------------------------------------------------------------------------------------------------------------------------------------------------------------------------------------------------------------------------------------------------------------------------------------------------------------------…
Migut.M00986.3.p ----------------------------------------------------------------------------------------------------------------------------------------------------------------------------------------------------------------------------------------------------------------------------------------------------------------------------------------------------------------------------------------------…
Migut.N00831.1.p ----------------------------------------------------------------------------------------------------------------------------------------------------------------------------------------------------------------------------------------------------------------------------------------------------------------------------------------------------------------------------------------------…
Migut.N00838.1.p ----------------------------------------------------------------------------------------------------------------------------------------------------------------------------------------------------------------------------------------------------------------------------------------------------------------------------------------------------------------------------------------------…
Migut.N01110.1.p ----------------------------------------------------------------------------------------------------------------------------------------------------------------------------------------------------------------------------------------------------------------------------------------------------------------------------------------------------------------------------------------------…
Migut.N01120.1.p ----------------------------------------------------------------------------------------------------------------------------------------------------------------------------------------------------------------------------------------------------------------------------------------------------------------------------------------------------------------------------------------------…
Migut.N01290.1.p ----------------------------------------------------------------------------------------------------------------------------------------------------------------------------------------------------------------------------------------------------------------------------------------------------------------------------------------------------------------------------------------------…
Migut.N01413.1.p ----------------------------------------------------------------------------------------------------------------------------------------------------------------------------------------------------------------------------------------------------------------------------------------------------------------------------------------------------------------------------------------------…
Migut.N01504.1.p ----------------------------------------------------------------------------------------------------------------------------------------------------------------------------------------------------------------------------------------------------------------------------------------------------------------------------------------------------------------------------------------------…
Migut.N01802.1.p ----------------------------------------------------------------------------------------------------------------------------------------------------------------------------------------------------------------------------------------------------------------------------------------------------------------------------------------------------------------------------------------------…
Migut.N02839.1.p ----------------------------------------------------------------------------------------------------------------------------------------------------------------------------------------------------------------------------------------------------------------------------------------------------------------------------------------------------------------------------------------------…
Migut.N03130.1.p ----------------------------------------------------------------------------------------------------------------------------------------------------------------------------------------------------------------------------------------------------------------------------------------------------------------------------------------------------------------------------------------------…
Migut.O00478.1.p ----------------------------------------------------------------------------------------------------------------------------------------------------------------------------------------------------------------------------------------------------------------------------------------------------------------------------------------------------------------------------------------------…
Migut.O00574.1.p ----------------------------------------------------------------------------------------------------------------------------------------------------------------------------------------------------------------------------------------------------------------------------------------------------------------------------------------------------------------------------------------------…
Potri.001G058200.1 --------------------------------------------------------------------------------------------------------------------------------------------------------------------------------------------------------------------------------------------------------------------------------------------------------------------------------------------------------------------------------------------…
Potri.001G058400.1 --------------------------------------------------------------------------------------------------------------------------------------------------------------------------------------------------------------------------------------------------------------------------------------------------------------------------------------------------------------------------------------------…
Potri.001G112400.1 --------------------------------------------------------------------------------------------------------------------------------------------------------------------------------------------------------------------------------------------------------------------------------------------------------------------------------------------------------------------------------------------…
Potri.001G214900.1 --------------------------------------------------------------------------------------------------------------------------------------------------------------------------------------------------------------------------------------------------------------------------------------------------------------------------------------------------------------------------------------------…
Potri.001G251400.1 --------------------------------------------------------------------------------------------------------------------------------------------------------------------------------------------------------------------------------------------------------------------------------------------------------------------------------------------------------------------------------------------…
Potri.001G284300.1 --------------------------------------------------------------------------------------------------------------------------------------------------------------------------------------------------------------------------------------------------------------------------------------------------------------------------------------------------------------------------------------------…
Potri.001G328400.1 --------------------------------------------------------------------------------------------------------------------------------------------------------------------------------------------------------------------------------------------------------------------------------------------------------------------------------------------------------------------------------------------…
Potri.001G329800.1 --------------------------------------------------------------------------------------------------------------------------------------------------------------------------------------------------------------------------------------------------------------------------------------------------------------------------------------------------------------------------------------------…
Potri.002G028400.1 --------------------------------------------------------------------------------------------------------------------------------------------------------------------------------------------------------------------------------------------------------------------------------------------------------------------------------------------------------------------------------------------…
Potri.002G062000.1 --------------------------------------------------------------------------------------------------------------------------------------------------------------------------------------------------------------------------------------------------------------------------------------------------------------------------------------------------------------------------------------------…
Potri.002G079000.1 --------------------------------------------------------------------------------------------------------------------------------------------------------------------------------------------------------------------------------------------------------------------------------------------------------------------------------------------------------------------------------------------…
Potri.002G092300.1 --------------------------------------------------------------------------------------------------------------------------------------------------------------------------------------------------------------------------------------------------------------------------------------------------------------------------------------------------------------------------------------------…
Potri.002G105600.1 --------------------------------------------------------------------------------------------------------------------------------------------------------------------------------------------------------------------------------------------------------------------------------------------------------------------------------------------------------------------------------------------…
Potri.002G109700.1 --------------------------------------------------------------------------------------------------------------------------------------------------------------------------------------------------------------------------------------------------------------------------------------------------------------------------------------------------------------------------------------------…
Potri.002G151700.4 --------------------------------------------------------------------------------------------------------------------------------------------------------------------------------------------------------------------------------------------------------------------------------------------------------------------------------------------------------------------------------------------…
Potri.002G255700.1 --------------------------------------------------------------------------------------------------------------------------------------------------------------------------------------------------------------------------------------------------------------------------------------------------------------------------------------------------------------------------------------------…
Potri.003G119700.2 --------------------------------------------------------------------------------------------------------------------------------------------------------------------------------------------------------------------------------------------------------------------------------------------------------------------------------------------------------------------------------------------…
Potri.003G169600.1 --------------------------------------------------------------------------------------------------------------------------------------------------------------------------------------------------------------------------------------------------------------------------------------------------------------------------------------------------------------------------------------------…
Potri.003G169700.1 --------------------------------------------------------------------------------------------------------------------------------------------------------------------------------------------------------------------------------------------------------------------------------------------------------------------------------------------------------------------------------------------…
Potri.003G169800.1 --------------------------------------------------------------------------------------------------------------------------------------------------------------------------------------------------------------------------------------------------------------------------------------------------------------------------------------------------------------------------------------------…
Potri.003G170000.1 --------------------------------------------------------------------------------------------------------------------------------------------------------------------------------------------------------------------------------------------------------------------------------------------------------------------------------------------------------------------------------------------…
Potri.003G170200.1 --------------------------------------------------------------------------------------------------------------------------------------------------------------------------------------------------------------------------------------------------------------------------------------------------------------------------------------------------------------------------------------------…
Potri.004G002400.1 --------------------------------------------------------------------------------------------------------------------------------------------------------------------------------------------------------------------------------------------------------------------------------------------------------------------------------------------------------------------------------------------…
Potri.004G010200.1 --------------------------------------------------------------------------------------------------------------------------------------------------------------------------------------------------------------------------------------------------------------------------------------------------------------------------------------------------------------------------------------------…
Potri.004G064300.1 --------------------------------------------------------------------------------------------------------------------------------------------------------------------------------------------------------------------------------------------------------------------------------------------------------------------------------------------------------------------------------------------…
Potri.004G115400.1 --------------------------------------------------------------------------------------------------------------------------------------------------------------------------------------------------------------------------------------------------------------------------------------------------------------------------------------------------------------------------------------------…
Potri.004G115500.1 --------------------------------------------------------------------------------------------------------------------------------------------------------------------------------------------------------------------------------------------------------------------------------------------------------------------------------------------------------------------------------------------…
Potri.004G130900.1 --------------------------------------------------------------------------------------------------------------------------------------------------------------------------------------------------------------------------------------------------------------------------------------------------------------------------------------------------------------------------------------------…
Potri.004G131100.1 --------------------------------------------------------------------------------------------------------------------------------------------------------------------------------------------------------------------------------------------------------------------------------------------------------------------------------------------------------------------------------------------…
Potri.004G222200.1 --------------------------------------------------------------------------------------------------------------------------------------------------------------------------------------------------------------------------------------------------------------------------------------------------------------------------------------------------------------------------------------------…
Potri.005G002400.1 --------------------------------------------------------------------------------------------------------------------------------------------------------------------------------------------------------------------------------------------------------------------------------------------------------------------------------------------------------------------------------------------…
Potri.005G091100.1 --------------------------------------------------------------------------------------------------------------------------------------------------------------------------------------------------------------------------------------------------------------------------------------------------------------------------------------------------------------------------------------------…
Potri.005G118000.1 --------------------------------------------------------------------------------------------------------------------------------------------------------------------------------------------------------------------------------------------------------------------------------------------------------------------------------------------------------------------------------------------…
Potri.005G150700.1 --------------------------------------------------------------------------------------------------------------------------------------------------------------------------------------------------------------------------------------------------------------------------------------------------------------------------------------------------------------------------------------------…
Potri.005G155300.1 --------------------------------------------------------------------------------------------------------------------------------------------------------------------------------------------------------------------------------------------------------------------------------------------------------------------------------------------------------------------------------------------…
Potri.005G155700.1 --------------------------------------------------------------------------------------------------------------------------------------------------------------------------------------------------------------------------------------------------------------------------------------------------------------------------------------------------------------------------------------------…
Potri.005G169600.1 --------------------------------------------------------------------------------------------------------------------------------------------------------------------------------------------------------------------------------------------------------------------------------------------------------------------------------------------------------------------------------------------…
Potri.005G182200.1 --------------------------------------------------------------------------------------------------------------------------------------------------------------------------------------------------------------------------------------------------------------------------------------------------------------------------------------------------------------------------------------------…
Potri.006G048700.1 --------------------------------------------------------------------------------------------------------------------------------------------------------------------------------------------------------------------------------------------------------------------------------------------------------------------------------------------------------------------------------------------…
Potri.006G201700.1 --------------------------------------------------------------------------------------------------------------------------------------------------------------------------------------------------------------------------------------------------------------------------------------------------------------------------------------------------------------------------------------------…
Potri.006G258500.1 --------------------------------------------------------------------------------------------------------------------------------------------------------------------------------------------------------------------------------------------------------------------------------------------------------------------------------------------------------------------------------------------…
Potri.007G010800.1 --------------------------------------------------------------------------------------------------------------------------------------------------------------------------------------------------------------------------------------------------------------------------------------------------------------------------------------------------------------------------------------------…
Potri.007G017000.1 --------------------------------------------------------------------------------------------------------------------------------------------------------------------------------------------------------------------------------------------------------------------------------------------------------------------------------------------------------------------------------------------…
Potri.007G050400.1 --------------------------------------------------------------------------------------------------------------------------------------------------------------------------------------------------------------------------------------------------------------------------------------------------------------------------------------------------------------------------------------------…
Potri.007G073000.1 --------------------------------------------------------------------------------------------------------------------------------------------------------------------------------------------------------------------------------------------------------------------------------------------------------------------------------------------------------------------------------------------…
Potri.007G087500.1 --------------------------------------------------------------------------------------------------------------------------------------------------------------------------------------------------------------------------------------------------------------------------------------------------------------------------------------------------------------------------------------------…
Potri.007G113800.1 --------------------------------------------------------------------------------------------------------------------------------------------------------------------------------------------------------------------------------------------------------------------------------------------------------------------------------------------------------------------------------------------…
Potri.007G114000.1 --------------------------------------------------------------------------------------------------------------------------------------------------------------------------------------------------------------------------------------------------------------------------------------------------------------------------------------------------------------------------------------------…
Potri.007G115000.1 --------------------------------------------------------------------------------------------------------------------------------------------------------------------------------------------------------------------------------------------------------------------------------------------------------------------------------------------------------------------------------------------…
Potri.007G115100.1 --------------------------------------------------------------------------------------------------------------------------------------------------------------------------------------------------------------------------------------------------------------------------------------------------------------------------------------------------------------------------------------------…
Potri.007G115200.1 --------------------------------------------------------------------------------------------------------------------------------------------------------------------------------------------------------------------------------------------------------------------------------------------------------------------------------------------------------------------------------------------…
Potri.007G120000.1 --------------------------------------------------------------------------------------------------------------------------------------------------------------------------------------------------------------------------------------------------------------------------------------------------------------------------------------------------------------------------------------------…
Potri.008G020300.1 --------------------------------------------------------------------------------------------------------------------------------------------------------------------------------------------------------------------------------------------------------------------------------------------------------------------------------------------------------------------------------------------…
Potri.008G041500.1 --------------------------------------------------------------------------------------------------------------------------------------------------------------------------------------------------------------------------------------------------------------------------------------------------------------------------------------------------------------------------------------------…
Potri.008G088200.1 --------------------------------------------------------------------------------------------------------------------------------------------------------------------------------------------------------------------------------------------------------------------------------------------------------------------------------------------------------------------------------------------…
Potri.008G098400.1 --------------------------------------------------------------------------------------------------------------------------------------------------------------------------------------------------------------------------------------------------------------------------------------------------------------------------------------------------------------------------------------------…
Potri.008G098500.1 --------------------------------------------------------------------------------------------------------------------------------------------------------------------------------------------------------------------------------------------------------------------------------------------------------------------------------------------------------------------------------------------…
Potri.009G045900.1 --------------------------------------------------------------------------------------------------------------------------------------------------------------------------------------------------------------------------------------------------------------------------------------------------------------------------------------------------------------------------------------------…
Potri.009G055700.1 --------------------------------------------------------------------------------------------------------------------------------------------------------------------------------------------------------------------------------------------------------------------------------------------------------------------------------------------------------------------------------------------…
Potri.009G084100.1 --------------------------------------------------------------------------------------------------------------------------------------------------------------------------------------------------------------------------------------------------------------------------------------------------------------------------------------------------------------------------------------------…
Potri.009G084200.1 --------------------------------------------------------------------------------------------------------------------------------------------------------------------------------------------------------------------------------------------------------------------------------------------------------------------------------------------------------------------------------------------…
Potri.010G098100.1 --------------------------------------------------------------------------------------------------------------------------------------------------------------------------------------------------------------------------------------------------------------------------------------------------------------------------------------------------------------------------------------------…
Potri.010G154100.1 --------------------------------------------------------------------------------------------------------------------------------------------------------------------------------------------------------------------------------------------------------------------------------------------------------------------------------------------------------------------------------------------…
Potri.010G167300.1 --------------------------------------------------------------------------------------------------------------------------------------------------------------------------------------------------------------------------------------------------------------------------------------------------------------------------------------------------------------------------------------------…
Potri.010G181300.1 --------------------------------------------------------------------------------------------------------------------------------------------------------------------------------------------------------------------------------------------------------------------------------------------------------------------------------------------------------------------------------------------…
Potri.010G238900.1 --------------------------------------------------------------------------------------------------------------------------------------------------------------------------------------------------------------------------------------------------------------------------------------------------------------------------------------------------------------------------------------------…
Potri.011G075800.1 --------------------------------------------------------------------------------------------------------------------------------------------------------------------------------------------------------------------------------------------------------------------------------------------------------------------------------------------------------------------------------------------…
Potri.012G062300.1 --------------------------------------------------------------------------------------------------------------------------------------------------------------------------------------------------------------------------------------------------------------------------------------------------------------------------------------------------------------------------------------------…
Potri.012G100200.2 --------------------------------------------------------------------------------------------------------------------------------------------------------------------------------------------------------------------------------------------------------------------------------------------------------------------------------------------------------------------------------------------…
Potri.012G109900.1 --------------------------------------------------------------------------------------------------------------------------------------------------------------------------------------------------------------------------------------------------------------------------------------------------------------------------------------------------------------------------------------------…
Potri.012G110100.1 --------------------------------------------------------------------------------------------------------------------------------------------------------------------------------------------------------------------------------------------------------------------------------------------------------------------------------------------------------------------------------------------…
Potri.012G125600.1 --------------------------------------------------------------------------------------------------------------------------------------------------------------------------------------------------------------------------------------------------------------------------------------------------------------------------------------------------------------------------------------------…
Potri.012G132600.1 --------------------------------------------------------------------------------------------------------------------------------------------------------------------------------------------------------------------------------------------------------------------------------------------------------------------------------------------------------------------------------------------…
Potri.012G133000.1 --------------------------------------------------------------------------------------------------------------------------------------------------------------------------------------------------------------------------------------------------------------------------------------------------------------------------------------------------------------------------------------------…
Potri.013G001700.1 --------------------------------------------------------------------------------------------------------------------------------------------------------------------------------------------------------------------------------------------------------------------------------------------------------------------------------------------------------------------------------------------…
Potri.013G018100.1 --------------------------------------------------------------------------------------------------------------------------------------------------------------------------------------------------------------------------------------------------------------------------------------------------------------------------------------------------------------------------------------------…
Potri.013G102600.1 --------------------------------------------------------------------------------------------------------------------------------------------------------------------------------------------------------------------------------------------------------------------------------------------------------------------------------------------------------------------------------------------…
Potri.013G104900.1 --------------------------------------------------------------------------------------------------------------------------------------------------------------------------------------------------------------------------------------------------------------------------------------------------------------------------------------------------------------------------------------------…
Potri.013G107600.1 --------------------------------------------------------------------------------------------------------------------------------------------------------------------------------------------------------------------------------------------------------------------------------------------------------------------------------------------------------------------------------------------…
Potri.014G074100.1 --------------------------------------------------------------------------------------------------------------------------------------------------------------------------------------------------------------------------------------------------------------------------------------------------------------------------------------------------------------------------------------------…
Potri.014G074200.1 --------------------------------------------------------------------------------------------------------------------------------------------------------------------------------------------------------------------------------------------------------------------------------------------------------------------------------------------------------------------------------------------…
Potri.015G077800.1 --------------------------------------------------------------------------------------------------------------------------------------------------------------------------------------------------------------------------------------------------------------------------------------------------------------------------------------------------------------------------------------------…
Potri.015G098400.1 --------------------------------------------------------------------------------------------------------------------------------------------------------------------------------------------------------------------------------------------------------------------------------------------------------------------------------------------------------------------------------------------…
Potri.015G125500.1 --------------------------------------------------------------------------------------------------------------------------------------------------------------------------------------------------------------------------------------------------------------------------------------------------------------------------------------------------------------------------------------------…
Potri.015G134800.1 ---------------------------------------------------------------------------------------------------------------------------------------------------------------------------------------------------------------------------------------------------------------------------------MMS----------------------------------------------------------------------------SSYF------------------------…
Potri.016G068100.1 --------------------------------------------------------------------------------------------------------------------------------------------------------------------------------------------------------------------------------------------------------------------------------------------------------------------------------------------------------------------------------------------…
Potri.016G118900.1 --------------------------------------------------------------------------------------------------------------------------------------------------------------------------------------------------------------------------------------------------------------------------------------------------------------------------------------------------------------------------------------------…
Potri.016G119000.1 --------------------------------------------------------------------------------------------------------------------------------------------------------------------------------------------------------------------------------------------------------------------------------------------------------------------------------------------------------------------------------------------…
Potri.017G039800.1 --------------------------------------------------------------------------------------------------------------------------------------------------------------------------------------------------------------------------------------------------------------------------------------------------------------------------------------------------------------------------------------------…
Potri.017G040600.1 --------------------------------------------------------------------------------------------------------------------------------------------------------------------------------------------------------------------------------------------------------------------------------------------------------------------------------------------------------------------------------------------…
Potri.017G040700.1 --------------------------------------------------------------------------------------------------------------------------------------------------------------------------------------------------------------------------------------------------------------------------------------------------------------------------------------------------------------------------------------------…
Potri.017G044200.1 --------------------------------------------------------------------------------------------------------------------------------------------------------------------------------------------------------------------------------------------------------------------------------------------------------------------------------------------------------------------------------------------…
Potri.017G044500.1 --------------------------------------------------------------------------------------------------------------------------------------------------------------------------------------------------------------------------------------------------------------------------------------------------------------------------------------------------------------------------------------------…
Potri.017G047300.1 --------------------------------------------------------------------------------------------------------------------------------------------------------------------------------------------------------------------------------------------------------------------------------------------------------------------------------------------------------------------------------------------…
Potri.017G099700.1 --------------------------------------------------------------------------------------------------------------------------------------------------------------------------------------------------------------------------------------------------------------------------------------------------------------------------------------------------------------------------------------------…
Potri.017G099800.1 --------------------------------------------------------------------------------------------------------------------------------------------------------------------------------------------------------------------------------------------------------------------------------------------------------------------------------------------------------------------------------------------…
Potri.017G124000.1 --------------------------------------------------------------------------------------------------------------------------------------------------------------------------------------------------------------------------------------------------------------------------------------------------------------------------------------------------------------------------------------------…
Potri.018G048000.1 --------------------------------------------------------------------------------------------------------------------------------------------------------------------------------------------------------------------------------------------------------------------------------------------------------------------------------------------------------------------------------------------…
Potri.019G076800.1 --------------------------------------------------------------------------------------------------------------------------------------------------------------------------------------------------------------------------------------------------------------------------------------------------------------------------------------------------------------------------------------------…
Potri.019G077200.1 --------------------------------------------------------------------------------------------------------------------------------------------------------------------------------------------------------------------------------------------------------------------------------------------------------------------------------------------------------------------------------------------…
Potri.T101400.1 -----------------------------------------------------------------------------------------------------------------------------------------------------------------------------------------------------------------------------------------------------------------------------------------------------------------------------------------------------------------------------------------------…
Potri.T101600.1 -----------------------------------------------------------------------------------------------------------------------------------------------------------------------------------------------------------------------------------------------------------------------------------------------------------------------------------------------------------------------------------------------…
SGA_v2.0_scaffold104T30212 ----------------MDH-------------------------------------------------------------------------------------------------------------------------------------------------------------------------------------------------------------------------------------------------------------TTI-----------------------------------------------------------------------------AAAVTSAAAKK---------…
SGA_v2.0_scaffold10T05408 -------------------------------------------------------------------------------------------------------------------------------------------------------------------------------------------------------------------------------------------------------------------------------------------------------------------------------------------------------------------------------------…
SGA_v2.0_scaffold111T31438 ------------------------------------------------------------------------------------------------------------------------------------------------------------------------------------------------------------------------------------------------------------------------------------------------------------------------------------------------------------------------------------…
SGA_v2.0_scaffold118T32570 ------------------------------------------------------------------------------------------------------------------------------------------------------------------------------------------------------------------------------------------------------------------------------------------------------------------------------------------------------------------------------------…
SGA_v2.0_scaffold118T32576 ------------------------------------------------------------------------------------------------------------------------------------------------------------------------------------------------------------------------------------------------------------------------------------------------------------------------------------------------------------------------------------…
SGA_v2.0_scaffold11T05622 -------------------------------------------------------------------------------------------------------------------------------------------------------------------------------------------------------------------------------------------------------------------------------------------------------------------------------------------------------------------------------------…
SGA_v2.0_scaffold144T35855 ------------------------------------------------------------------------------------------------------------------------------------------------------------------------------------------------------------------------------------------------------------------------------------------------------------------------------------------------------------------------------------…
SGA_v2.0_scaffold144T35870 ------------------------------------------------------------------------------------------------------------------------------------------------------------------------------------------------------------------------------------------------------------------------------------------------------------------------------------------------------------------------------------…
SGA_v2.0_scaffold146T36210 ------------------------------------------------------------------------------------------------------------------------------------------------------------------------------------------------------------------------------------------------------------------------------------------------------------------------------------------------------------------------------------…
SGA_v2.0_scaffold148T36443 ------------------------------------------------------------------------------------------------------------------------------------------------------------------------------------------------------------------------------------------------------------------------------------------------------------------------------------------------------------------------------------…
SGA_v2.0_scaffold14T07116 -------------------------------------------------------------------------------------------------------------------------------------------------------------------------------------------------------------------------------------------------------------------------------------------------------------------------------------------------------------------------------------…
SGA_v2.0_scaffold153T36988 ------------------------------------------------------------------------------------------------------------------------------------------------------------------------------------------------------------------------------------------------------------------------------------------------------------------------------------------------------------------------------------…
SGA_v2.0_scaffold153T37049 ------------------------------------------------------------------------------------------------------------------------------------------------------------------------------------------------------------------------------------------------------------------------------------------------------------------------------------------------------------------------------------…
SGA_v2.0_scaffold153T37050 ------------------------------------------------------------------------------------------------------------------------------------------------------------------------------------------------------------------------------------------------------------------------------------------------------------------------------------------------------------------------------------…
SGA_v2.0_scaffold157T37317 ------------------------------------------------------------------------------------------------------------------------------------------------------------------------------------------------------------------------------------------------------------------------------------------------------------------------------------------------------------------------------------…
SGA_v2.0_scaffold162T37923 ------------------------------------------------------------------------------------------------------------------------------------------------------------------------------------------------------------------------------------------------------------------------------------------------------------------------------------------------------------------------------------…
SGA_v2.0_scaffold172T38970 ------------------------------------------------------------------------------------------------------------------------------------------------------------------------------------------------------------------------------------------------------------------------------------------------------------------------------------------------------------------------------------…
SGA_v2.0_scaffold1T00154 --------------------------------------------------------------------------------------------------------------------------------------------------------------------------------------------------------------------------------------------------------------------------------------------------------------------------------------------------------------------------------------…
SGA_v2.0_scaffold201T41318 ------------------------------------------------------------------------------------------------------------------------------------------------------------------------------------------------------------------------------------------------------------------------------------------------------------------------------------------------------------------------------------…
SGA_v2.0_scaffold221T42746 ------------------------------------------------------------------------------------------------------------------------------------------------------------------------------------------------------------------------------------------------------------------------------------------------------------------------------------------------------------------------------------…
SGA_v2.0_scaffold24T10612 -------------------------------------------------------------------------------------------------------------------------------------------------------------------------------------------------------------------------------------------------------------------------------------------------------------------------------------------------------------------------------------…
SGA_v2.0_scaffold25T10919 -------------------------------------------------------------------------------------------------------------------------------------------------------------------------------------------------------------------------------------------------------------------------------------------------------------------------------------------------------------------------------------…
SGA_v2.0_scaffold26T11297 -------------------------------------------------------------------------------------------------------------------------------------------------------------------------------------------------------------------------------------------------------------------------------------------------------------------------------------------------------------------------------------…
SGA_v2.0_scaffold279T46786 ------------------------------------------------------------------------------------------------------------------------------------------------------------------------------------------------------------------------------------------------------------------------------------------------------------------------------------------------------------------------------------…
SGA_v2.0_scaffold27T11644 -------------------------------------------------------------------------------------------------------------------------------------------------------------------------------------------------------------------------------------------------------------------------------------------------------------------------------------------------------------------------------------…
SGA_v2.0_scaffold287T47181 ------------------------------------------------------------------------------------------------------------------------------------------------------------------------------------------------------------------------------------------------------------------------------------------------------------------------------------------------------------------------------------…
SGA_v2.0_scaffold2T01094 --------------------------------------------------------------------------------------------------------------------------------------------------------------------------------------------------------------------------------------------------------------------------------------------------------------------------------------------------------------------------------------…
SGA_v2.0_scaffold2T01324 --------------------------------------------------------------------------------------------------------------------------------------------------------------------------------------------------------------------------------------------------------------------------------------------------------------------------------------------------------------------------------------…
SGA_v2.0_scaffold304T47921 ------------------------------------------------------------------------------------------------------------------------------------------------------------------------------------------------------------------------------------------------------------------------------------------------------------------------------------------------------------------------------------…
SGA_v2.0_scaffold30T12416 -------------------------------------------------------------------------------------------------------------------------------------------------------------------------------------------------------------------------------------------------------------------------------------------------------------------------------------------------------------------------------------…
SGA_v2.0_scaffold32T12976 -------------------------------------------------------------------------------------------------------------------------------------------------------------------------------------------------------------------------------------------------------------------------------------------------------------------------------------------------------------------------------------…
SGA_v2.0_scaffold32T12977 -------------------------------------------------------------------------------------------------------------------------------------------------------------------------------------------------------------------------------------------------------------------------------------------------------------------------------------------------------------------------------------…
SGA_v2.0_scaffold337T49184 ------------------------------------------------------------------------------------------------------------------------------------------------------------------------------------------------------------------------------------------------------------------------------------------------------------------------------------------------------------------------------------…
SGA_v2.0_scaffold342T49433 ------------------------------------------------------------------------------------------------------------------------------------------------------------------------------------------------------------------------------------------------------------------------------------------------------------------------------------------------------------------------------------…
SGA_v2.0_scaffold37T14631 -------------------------------------------------------------------------------------------------------------------------------------------------------------------------------------------------------------------------------------------------------------------------------------------------------------------------------------------------------------------------------------…
SGA_v2.0_scaffold391T50619 ------------------------------------------------------------------------------------------------------------------------------------------------------------------------------------------------------------------------------------------------------------------------------------------------------------------------------------------------------------------------------------…
SGA_v2.0_scaffold41T15855 -------------------------------------------------------------------------------------------------------------------------------------------------------------------------------------------------------------------------------------------------------------------------------------------------------------------------------------------------------------------------------------…
SGA_v2.0_scaffold45T17235 -------------------------------------------------------------------------------------------------------------------------------------------------------------------------------------------------------------------------------------------------------------------------------------------------------------------------------------------------------------------------------------…
SGA_v2.0_scaffold4T01869 ---------------------------------------------------------------------------------------------------------------------------------------------------------------------------------------------------------------------------------------------------------------------------------MV---------------------------------------------------------------------------------------------------…
SGA_v2.0_scaffold5006T54578 -----------------------------------------------------------------------------------------------------------------------------------------------------------------------------------------------------------------------------------------------------------------------------------------------------------------------------------------------------------------------------------…
SGA_v2.0_scaffold511T52625 ------------------------------------------------------------------------------------------------------------------------------------------------------------------------------------------------------------------------------------------------------------------------------------------------------------------------------------------------------------------------------------…
SGA_v2.0_scaffold519T52685 ------------------------------------------------------------------------------------------------------------------------------------------------------------------------------------------------------------------------------------------------------------------------------------------------------------------------------------------------------------------------------------…
SGA_v2.0_scaffold51T18728 -------------------------------------------------------------------------------------------------------------------------------------------------------------------------------------------------------------------------------------------------------------------------------------------------------------------------------------------------------------------------------------…
SGA_v2.0_scaffold52T18923 -------------------------------------------------------------------------------------------------------------------------------------------------------------------------------------------------------------------------------------------------------------------------------------------------------------------------------------------------------------------------------------…
SGA_v2.0_scaffold56T19998 -------------------------------------------------------------------------------------------------------------------------------------------------------------------------------------------------------------------------------------------------------------------------------------------------------------------------------------------------------------------------------------…
SGA_v2.0_scaffold58T20582 ---------------------------------------------------------------------------------------------------------------------------------------------------------------------------------------------------------------------------------------------------------------------------------MI-----------------------------------------------------------------------------KCIST----------------…
SGA_v2.0_scaffold5T03072 --------------------------------------------------------------------------------------------------------------------------------------------------------------------------------------------------------------------------------------------------------------------------------------------------------------------------------------------------------------------------------------…
SGA_v2.0_scaffold5T03073 --------------------------------------------------------------------------------------------------------------------------------------------------------------------------------------------------------------------------------------------------------------------------------------------------------------------------------------------------------------------------------------…
SGA_v2.0_scaffold69T23122 -------------------------------------------------------------------------------------------------------------------------------------------------------------------------------------------------------------------------------------------------------------------------------------------------------------------------------------------------------------------------------------…
SGA_v2.0_scaffold83T26372 -------------------------------------------------------------------------------------------------------------------------------------------------------------------------------------------------------------------------------------------------------------------------------------------------------------------------------------------------------------------------------------…
SGA_v2.0_scaffold98T29415 -------------------------------------------------------------------------------------------------------------------------------------------------------------------------------------------------------------------------------------------------------------------------------------------------------------------------------------------------------------------------------------…
14_15765_2 ----------------------------------------------------------------------------------------------------------------------------------------------------------------------------------------------------------------------------------------------------------------------------------------------------------------------------------------------------------------------------------------------------…
SPA00425 ------------------------------------------------------------------------------------------------------------------------------------------------------------------------------------------------------------------------------------------------------------------------------------------------------------------------------------------------------------------------------------------------------…
SPA00493 ------------------------------------------------------------------------------------------------------------------------------------------------------------------------------------------------------------------------------------------------------------------------------------------------------------------------------------------------------------------------------------------------------…
SPA00519 ----------------MLF-----------------------------------------------------------------------------------------------------------G---------------------------------------------------------------------------------------------------------------------------------------------DVDEMPK-------------------------------------------------------------------------------------------------------------------…
SPA00796 ------------------------------------------------------------------------------------------------------------------------------------------------------------------------------------------------------------------------------------------------------------------------------------------------------------------------------------------------------------------------------------------------------…
SPA00890 ------------------------------------------------------------------------------------------------------------------------------------------------------------------------------------------------------------------------------------------------------------------------------------------------------------------------------------------------------------------------------------------------------…
SPA01410 ------------------------------------------------------------------------------------------------------------------------------------------------------------------------------------------------------------------------------------------------------------------------------------------------------------------------------------------------------------------------------------------------------…
SPA01411 ------------------------------------------------------------------------------------------------------------------------------------------------------------------------------------------------------------------------------------------------------------------------------------------------------------------------------------------------------------------------------------------------------…
SPA03627 ------------------------------------------------------------------------------------------------------------------------------------------------------------------------------------------------------------------------------------------------------------------------------------------------------------------------------------------------------------------------------------------------------…
SPA04964 ------------------------------------------------------------------------------------------------------------------------------------------------------------------------------------------------------------------------------------------------------------------------------------------------------------------------------------------------------------------------------------------------------…
SPA05017 ------------------------------------------------------------------------------------------------------------------------------------------------------------------------------------------------------------------------------------------------------------------------------------------------------------------------------------------------------------------------------------------------------…
SPA05335 ------------------------------------------------------------------------------------------------------------------------------------------------------------------------------------------------------------------------------------------------------------------------------------------------------------------------------------------------------------------------------------------------------…
SPA05965 ------------------------------------------------------------------------------------------------------------------------------------------------------------------------------------------------------------------------------------------------------------------------------------------------------------------------------------------------------------------------------------------------------…
SPA06542 ------------------------------------------------------------------------------------------------------------------------------------------------------------------------------------------------------------------------------------------------------------------------------------------------------------------------------------------------------------------------------------------------------…
SPA06990 ------------------------------------------------------------------------------------------------------------------------------------------------------------------------------------------------------------------------------------------------------------------------------------------------------------------------------------------------------------------------------------------------------…
SPA07567 ------------------------------------------------------------------------------------------------------------------------------------------------------------------------------------------------------------------------------------------------------------------------------------------------------------------------------------------------------------------------------------------------------…
SPA07851 ------------------------------------------------------------------------------------------------------------------------------------------------------------------------------------------------------------------------------------------------------------------------------------------------------------------------------------------------------------------------------------------------------…
SPA08193 ------------------------------------------------------------------------------------------------------------------------------------------------------------------------------------------------------------------------------------------------------------------------------------------------------------------------------------------------------------------------------------------------------…
SPA08961 ------------------------------------------------------------------------------------------------------------------------------------------------------------------------------------------------------------------------------------------------------------------------------------------------------------------------------------------------------------------------------------------------------…
SPA09480 ------------------------------------------------------------------------------------------------------------------------------------------------------------------------------------------------------------------------------------------------------------------------------------------------------------------------------------------------------------------------------------------------------…
SPA10181 ------------------------------------------------------------------------------------------------------------------------------------------------------------------------------------------------------------------------------------------------------------------------------------------------------------------------------------------------------------------------------------------------------…
SPA11510 ------------------------------------------------------------------------------------------------------------------------------------------------------------------------------------------------------------------------------------------------------------------------------------------------------------------------------------------------------------------------------------------------------…
SPA11511 ------------------------------------------------------------------------------------------------------------------------------------------------------------------------------------------------------------------------------------------------------------------------------------------------------------------------------------------------------------------------------------------------------…
SPA11810 ------------------------------------------------------------------------------------------------------------------------------------------------------------------------------------------------------------------------------------------------------------------------------------------------------------------------------------------------------------------------------------------------------…
SPA13643 ------------------------------------------------------------------------------------------------------------------------------------------------------------------------------------------------------------------------------------------------------------------------------------------------------------------------------------------------------------------------------------------------------…
SPA13915 ------------------------------------------------------------------------------------------------------------------------------------------------------------------------------------------------------------------------------------------------------------------------------------------------------------------------------------------------------------------------------------------------------…
SPA14081 ------------------------------------------------------------------------------------------------------------------------------------------------------------------------------------------------------------------------------------------------------------------------------------------------------------------------------------------------------------------------------------------------------…
SPA14886 ------------------------------------------------------------------------------------------------------------------------------------------------------------------------------------------------------------------------------------------------------------------------------------------------------------------------------------------------------------------------------------------------------…
SPA17746 ------------------------------------------------------------------------------------------------------------------------------------------------------------------------------------------------------------------------------------------------------------------------------------------------------------------------------------------------------------------------------------------------------…
SPA17941 ------------------------------------------------------------------------------------------------------------------------------------------------------------------------------------------------------------------------------------------------------------------------------------------------------------------------------------------------------------------------------------------------------…
SPA18672 ------------------------------------------------------------------------------------------------------------------------------------------------------------------------------------------------------------------------------------------------------------------------------------------------------------------------------------------------------------------------------------------------------…
SPA19823 ------------------------------------------------------------------------------------------------------------------------------------------------------------------------------------------------------------------------------------------------------------------------------------------------------------------------------------------------------------------------------------------------------…
SPA19940 ------------------------------------------------------------------------------------------------------------------------------------------------------------------------------------------------------------------------------------------------------------------------------------------------------------------------------------------------------------------------------------------------------…
SPA20109 ------------------------------------------------------------------------------------------------------------------------------------------------------------------------------------------------------------------------------------------------------------------------------------------------------------------------------------------------------------------------------------------------------…
SPA21775 ------------------------------------------------------------------------------------------------------------------------------------------------------------------------------------------------------------------------------------------------------------------------------------------------------------------------------------------------------------------------------------------------------…
SPA22223 ------------------------------------------------------------------------------------------------------------------------------------------------------------------------------------------------------------------------------------------------------------------------------------------------------------------------------------------------------------------------------------------------------…
SPA22508 ------------------------------------------------------------------------------------------------------------------------------------------------------------------------------------------------------------------------------------------------------------------------------------------------------------------------------------------------------------------------------------------------------…
SPA23279 ------------------------------------------------------------------------------------------------------------------------------------------------------------------------------------------------------------------------------------------------------------------------------------------------------------------------------------------------------------------------------------------------------…
SPA24931 ------------------------------------------------------------------------------------------------------------------------------------------------------------------------------------------------------------------------------------------------------------------------------------------------------------------------------------------------------------------------------------------------------…
SPA25348 ------------------------------------------------------------------------------------------------------------------------------------------------------------------------------------------------------------------------------------------------------------------------------------------------------------------------------------------------------------------------------------------------------…
SPA25613 ------------------------------------------------------------------------------------------------------------------------------------------------------------------------------------------------------------------------------------------------------------------------------------------------------------------------------------------------------------------------------------------------------…
SPA25616 ------------------------------------------------------------------------------------------------------------------------------------------------------------------------------------------------------------------------------------------------------------------------------------------------------------------------------------------------------------------------------------------------------…
SPA26088 ------------------------------------------------------------------------------------------------------------------------------------------------------------------------------------------------------------------------------------------------------------------------------------------------------------------------------------------------------------------------------------------------------…
SPA26176 ----------------------------------------------------------------------------------------------------------------------------------------------------------------------------------------------------------------------------------------------------------------------------------MA----------------------------------------------------------------------------AAF-----------------------------------…
SPA26201 ------------------------------------------------------------------------------------------------------------------------------------------------------------------------------------------------------------------------------------------------------------------------------------------------------------------------------------------------------------------------------------------------------…
Maole_000815.T1 -----------------------------------------------------------------------------------------------------------------------------------------------------------------------------------------------------------------------------------------------------------------------------------------------------------------------------------------------------------------------------------------------…
Maole_002762.T1 -----------------------------------------------------------------------------------------------------------------------------------------------------------------------------------------------------------------------------------------------------------------------------------------------------------------------------------------------------------------------------------------------…
Maole_003228.T1 -----------------------------------------------------------------------------------------------------------------------------------------------------------------------------------------------------------------------------------------------------------------------------------------------------------------------------------------------------------------------------------------------…
Maole_003229.T1 -----------------------------------------------------------------------------------------------------------------------------------------------------------------------------------------------------------------------------------------------------------------------------------------------------------------------------------------------------------------------------------------------…
Maole_003230.T1 -----------------------------------------------------------------------------------------------------------------------------------------------------------------------------------------------------------------------------------------------------------------------------------------------------------------------------------------------------------------------------------------------…
Maole_004019.T1 -----------------------------------------------------------------------------------------------------------------------------------------------------------------------------------------------------------------------------------------------------------------------------------------------------------------------------------------------------------------------------------------------…
Maole_005004.T1 -----------------------------------------------------------------------------------------------------------------------------------------------------------------------------------------------------------------------------------------------------------------------------------------------------------------------------------------------------------------------------------------------…
Maole_005006.T1 ----------------------------------------------------------------------------------------------------------------------------------------------------------------------------------------------------------------------------------------------------------------------------------MG----------------------------------------------------------------------------SSALGRIML----------------------…
Maole_005358.T1 -----------------------------------------------------------------------------------------------------------------------------------------------------------------------------------------------------------------------------------------------------------------------------------------------------------------------------------------------------------------------------------------------…
Maole_006673.T1 -----------------------------------------------------------------------------------------------------------------------------------------------------------------------------------------------------------------------------------------------------------------------------------------------------------------------------------------------------------------------------------------------…
Maole_006674.T1 -----------------------------------------------------------------------------------------------------------------------------------------------------------------------------------------------------------------------------------------------------------------------------------------------------------------------------------------------------------------------------------------------…
Maole_007852.T1 -----------------------------------------------------------------------------------------------------------------------------------------------------------------------------------------------------------------------------------------------------------------------------------------------------------------------------------------------------------------------------------------------…
Maole_007992.T1 -----------------------------------------------------------------------------------------------------------------------------------------------------------------------------------------------------------------------------------------------------------------------------------------------------------------------------------------------------------------------------------------------…
Maole_009058.T1 -----------------------------------------------------------------------------------------------------------------------------------------------------------------------------------------------------------------------------------------------------------------------------------------------------------------------------------------------------------------------------------------------…
Maole_009352.T1 -----------------------------------------------------------------------------------------------------------------------------------------------------------------------------------------------------------------------------------------------------------------------------------------------------------------------------------------------------------------------------------------------…
Maole_010117.T1 -----------------------------------------------------------------------------------------------------------------------------------------------------------------------------------------------------------------------------------------------------------------------------------------------------------------------------------------------------------------------------------------------…
Maole_010158.T1 -----------------------------------------------------------------------------------------------------------------------------------------------------------------------------------------------------------------------------------------------------------------------------------------------------------------------------------------------------------------------------------------------…
Maole_011296.T1 -----------------------------------------------------------------------------------------------------------------------------------------------------------------------------------------------------------------------------------------------------------------------------------------------------------------------------------------------------------------------------------------------…
Maole_011596.T1 -----------------------------------------------------------------------------------------------------------------------------------------------------------------------------------------------------------------------------------------------------------------------------------------------------------------------------------------------------------------------------------------------…
Maole_011635.T1 -----------------------------------------------------------------------------------------------------------------------------------------------------------------------------------------------------------------------------------------------------------------------------------------------------------------------------------------------------------------------------------------------…
Maole_011648.T1 ---------------------------------------------------------------------------------------------------------------------------------------------------------------------------------------------------------------------------------------------------------------------------------MLYKAISGASRLASW----------------------CS---------------------WTVKSGWT------PARPRFAGVSSTASSS--------------------…
Maole_011651.T1 MREHRXWGDAGEGLVSSDRL------------------------------------------------------------------------------------------X------------DFR----------------------------------------------------------------------------------------------------------------------------------------------RR-RTTIRPVRTDDERVKSFFEVERSPFGGLPGWSLQPLIEPCQRSS-----------------EWAXASGSE------ASIPAAEGGTSAAGLG--------------------…
Maole_011653.T1 -----------------------------------------------------------------------------------------------------------------------------------------------------------------------------------------------------------------------------------------------------------------------------------------------------------------------------------------------------------------------------------------------…
Maole_011657.T1 MREHHXWGDAGEGLVSSDHL------------------------------------------------------------------------------------------X------------DFR----------------------------------------------------------------------------------------------------------------------------------------------RR-RTTIRPVRTDDERVKSFFEVERSPLQGLPGGSLQPLIEPCQRSS-----------------EWAXASGSE------ASIPAAEGGTSAAGLG--------------------…
Maole_011660.T1 -----------------------------------------------------------------------------------------------------------------------------------------------------------------------------------------------------------------------------------------------------------------------------------------------------------------------------------------------------------------------------------------------…
Maole_011662.T1 -----------------------------------------------------------------------------------------------------------------------------------------------------------------------------------------------------------------------------------------------------------------------------------------------------------------------------------------------------------------------------------------------…
Maole_011663.T1 ----------------------------------------------------------------------------------------------------------------------------------------------------------------------------------------------------------------------------------------------------------------------------------------MAPSLKRLVEAAEGPGVG---------SSPCAXEIARVGGIPDRIDFPFFHFVWHFISTIDVHFRLHPPHP----ISSAAARR--------------------…
Maole_011666.T1 -----------------------------------------------------------------------------------------------------------------------------------------------------------------------------------------------------------------------------------------------------------------------------------------------------------------------------------------------------------------------------------------------…
Maole_011669.T1 -----------------------------------------------------------------------------------------------------------------------------------------------------------------------------------------------------------------------------------------------------------------------------------------------------------------------------------------------------------------------------------------------…
Maole_012783.T1 -----------------------------------------------------------------------------------------------------------------------------------------------------------------------------------------------------------------------------------------------------------------------------------------------------------------------------------------------------------------------------------------------…
Maole_012906.T1 -----------------------------------------------------------------------------------------------------------------------------------------------------------------------------------------------------------------------------------------------------------------------------------------------------------------------------------------------------------------------------------------------…
Maole_013767.T1 -----------------------------------------------------------------------------------------------------------------------------------------------------------------------------------------------------------------------------------------------------------------------------------------------------------------------------------------------------------------------------------------------…
Maole_013907.T1 -----------------------------------------------------------------------------------------------------------------------------------------------------------------------------------------------------------------------------------------------------------------------------------------------------------------------------------------------------------------------------------------------…
Maole_013908.T1 -----------------------------------------------------------------------------------------------------------------------------------------------------------------------------------------------------------------------------------------------------------------------------------------------------------------------------------------------------------------------------------------------…
Maole_013909.T1 -----------------------------------------------------------------------------------------------------------------------------------------------------------------------------------------------------------------------------------------------------------------------------------------------------------------------------------------------------------------------------------------------…
Maole_013911.T1 -----------------------------------------------------------------------------------------------------------------------------------------------------------------------------------------------------------------------------------------------------------------------------------------------------------------------------------------------------------------------------------------------…
Maole_013912.T1 -----------------------------------------------------------------------------------------------------------------------------------------------------------------------------------------------------------------------------------------------------------------------------------------------------------------------------------------------------------------------------------------------…
Maole_013913.T1 -----------------------------------------------------------------------------------------------------------------------------------------------------------------------------------------------------------------------------------------------------------------------------------------------------------------------------------------------------------------------------------------------…
Maole_013914.T1 -----------------------------------------------------------------------------------------------------------------------------------------------------------------------------------------------------------------------------------------------------------------------------------------------------------------------------------------------------------------------------------------------…
Maole_014255.T1 -----------------------------------------------------------------------------------------------------------------------------------------------------------------------------------------------------------------------------------------------------------------------------------------------------------------------------------------------------------------------------------------------…
Maole_014256.T1 -----------------------------------------------------------------------------------------------------------------------------------------------------------------------------------------------------------------------------------------------------------------------------------------------------------------------------------------------------------------------------------------------…
Maole_014257.T1 -----------------------------------------------------------------------------------------------------------------------------------------------------------------------------------------------------------------------------------------------------------------------------------------------------------------------------------------------------------------------------------------------…
Maole_014296.T1 -----------------------------------------------------------------------------------------------------------------------------------------------------------------------------------------------------------------------------------------------------------------------------------------------------------------------------------------------------------------------------------------------…
Maole_015825.T1 -----------------------------------------------------------------------------------------------------------------------------------------------------------------------------------------------------------------------------------------------------------------------------------------------------------------------------------------------------------------------------------------------…
Maole_016726.T1 ----------------M-----------------------------------------------------------------------------------------------------------------------------------------------------------------------------------------------------------------------------------------------------------------------------------------------------------------------------------------------------------MHL----------------…
Maole_018664.T1 -----------------------------------------------------------------------------------------------------------------------------------------------------------------------------------------------------------------------------------------------------------------------------------------------------------------------------------------------------------------------------------------------…
Maole_018799.T1 -----------------------------------------------------------------------------------------------------------------------------------------------------------------------------------------------------------------------------------------------------------------------------------------------------------------------------------------------------------------------------------------------…
Maole_018951.T1 -----------------------------------------------------------------------------------------------------------------------------------------------------------------------------------------------------------------------------------------------------------------------------------------------------------------------------------------------------------------------------------------------…
Maole_019614.T1 -----------------------------------------------------------------------------------------------------------------------------------------------------------------------------------------------------------------------------------------------------------------------------------------------------------------------------------------------------------------------------------------------…
Maole_019679.T1 -----------------------------------------------------------------------------------------------------------------------------------------------------------------------------------------------------------------------------------------------------------------------------------------------------------------------------------------------------------------------------------------------…
Maole_020131.T1 -----------------------------------------------------------------------------------------------------------------------------------------------------------------------------------------------------------------------------------------------------------------------------------------------------------------------------------------------------------------------------------------------…
Maole_020459.T1 -----------------------------------------------------------------------------------------------------------------------------------------------------------------------------------------------------------------------------------------------------------------------------------------------------------------------------------------------------------------------------------------------…
Maole_020927.T1 -----------------------------------------------------------------------------------------------------------------------------------------------------------------------------------------------------------------------------------------------------------------------------------------------------------------------------------------------------------------------------------------------…
Maole_020928.T1 -----------------------------------------------------------------------------------------------------------------------------------------------------------------------------------------------------------------------------------------------------------------------------------------------------------------------------------------------------------------------------------------------…
Maole_021057.T1 -----------------------------------------------------------------------------------------------------------------------------------------------------------------------------------------------------------------------------------------------------------------------------------------------------------------------------------------------------------------------------------------------…
Maole_021062.T1 -----------------------------------------------------------------------------------------------------------------------------------------------------------------------------------------------------------------------------------------------------------------------------------------------------------------------------------------------------------------------------------------------…
Maole_021418.T1 -----------------------------------------------------------------------------------------------------------------------------------------------------------------------------------------------------------------------------------------------------------------------------------------------------------------------------------------------------------------------------------------------…
Maole_022474.T1 -----------------------------------------------------------------------------------------------------------------------------------------------------------------------------------------------------------------------------------------------------------------------------------------------------------------------------------------------------------------------------------------------…
Maole_022546.T1 -----------------------------------------------------------------------------------------------------------------------------------------------------------------------------------------------------------------------------------------------------------------------------------------------------------------------------------------------------------------------------------------------…
Maole_022550.T1 -----------------------------------------------------------------------------------------------------------------------------------------------------------------------------------------------------------------------------------------------------------------------------------------------------------------------------------------------------------------------------------------------…
Maole_022684.T1 ----------------M---------------------------------------------------------------------------------------------------------------------------------------------------------------------------------------------------------------------------------------------------------------TAL-----------------------------------------------------------------------------KTIFTSFKLCF--------------------…
Maole_022994.T1 -----------------------------------------------------------------------------------------------------------------------------------------------------------------------------------------------------------------------------------------------------------------------------------------------------------------------------------------------------------------------------------------------…
Maole_023002.T1 ---------------------------------------------------------------------------------------------------------------------------------------------------------------------------------------------------------------------------------------------------------------------------------MM------------------------------------------------------------------------------------------------------------…
Maole_023364.T1 -----------------------------------------------------------------------------------------------------------------------------------------------------------------------------------------------------------------------------------------------------------------------------------------------------------------------------------------------------------------------------------------------…
SaT00518-R1 ---------------------------------------------------------------------------------------------------------------------------------------------------------------------------------------------------------------------------------------------------------------------------------------------------------------------------------------------------------------------------------------------------…
SaT00720-R1 ---------------------------------------------------------------------------------------------------------------------------------------------------------------------------------------------------------------------------------------------------------------------------------------------------------------------------------------------------------------------------------------------------…
SaT03146-R1 ---------------------------------------------------------------------------------------------------------------------------------------------------------------------------------------------------------------------------------------------------------------------------------------------------------------------------------------------------------------------------------------------------…
SaT05533-R1 ---------------------------------------------------------------------------------------------------------------------------------------------------------------------------------------------------------------------------------------------------------------------------------------------------------------------------------------------------------------------------------------------------…
SaT05727-R1 ---------------------------------------------------------------------------------------------------------------------------------------------------------------------------------------------------------------------------------------------------------------------------------------------------------------------------------------------------------------------------------------------------…
SaT09021-R1 ---------------------------------------------------------------------------------------------------------------------------------------------------------------------------------------------------------------------------------------------------------------------------------------------------------------------------------------------------------------------------------------------------…
SaT09994-R1 ---------------------------------------------------------------------------------------------------------------------------------------------------------------------------------------------------------------------------------------------------------------------------------------------------------------------------------------------------------------------------------------------------…
SaT11447-R1 ---------------------------------------------------------------------------------------------------------------------------------------------------------------------------------------------------------------------------------------------------------------------------------------------------------------------------------------------------------------------------------------------------…
SaT12063-R1 ---------------------------------------------------------------------------------------------------------------------------------------------------------------------------------------------------------------------------------------------------------------------------------------------------------------------------------------------------------------------------------------------------…
SaT12251-R1 ----------------MKRIP-----------------------------------------------------------------------KSAKAEGK---------IE------------DEE-----------------------------------------------------------------------------------------------------------------------------------------------Q-SQSM-----------------------------------------------------------------------------AASTSTLLLL-------------------------…
SaT14429-R1 ---------------------------------------------------------------------------------------------------------------------------------------------------------------------------------------------------------------------------------------------------------------------------------------------------------------------------------------------------------------------------------------------------…
SaT14430-R1 ---------------------------------------------------------------------------------------------------------------------------------------------------------------------------------------------------------------------------------------------------------------------------------------------------------------------------------------------------------------------------------------------------…
SaT14431-R1 ----------------------------------------------------------------------------------------------------------------------------------------------------------------------------------------------------------------------------------------------------------------------------------------------------------------------------------------------------------------------------MYLIIFF----------------…
SaT14887-R1 ---------------------------------------------------------------------------------------------------------------------------------------------------------------------------------------------------------------------------------------------------------------------------------------------------------------------------------------------------------------------------------------------------…
SaT14888-R1 ---------------------------------------------------------------------------------------------------------------------------------------------------------------------------------------------------------------------------------------------------------------------------------------------------------------------------------------------------------------------------------------------------…
SaT15365-R1 ---------------------------------------------------------------------------------------------------------------------------------------------------------------------------------------------------------------------------------------------------------------------------------------------------------------------------------------------------------------------------------------------------…
SaT15598-R1 ---------------------------------------------------------------------------------------------------------------------------------------------------------------------------------------------------------------------------------------------------------------------------------------------------------------------------------------------------------------------------------------------------…
SaT16647-R1 ---------------------------------------------------------------------------------------------------------------------------------------------------------------------------------------------------------------------------------------------------------------------------------------------------------------------------------------------------------------------------------------------------…
SaT16856-R1 ---------------------------------------------------------------------------------------------------------------------------------------------------------------------------------------------------------------------------------------------------------------------------------------------------------------------------------------------------------------------------------------------------…
SaT17323-R1 ---------------------------------------------------------------------------------------------------------------------------------------------------------------------------------------------------------------------------------------------------------------------------------------------------------------------------------------------------------------------------------------------------…
SaT17741-R1 ---------------------------------------------------------------------------------------------------------------------------------------------------------------------------------------------------------------------------------------------------------------------------------------------------------------------------------------------------------------------------------------------------…
SaT19250-R1 ---------------------------------------------------------------------------------------------------------------------------------------------------------------------------------------------------------------------------------------------------------------------------------------------------------------------------------------------------------------------------------------------------…
SaT19272-R1 ---------------------------------------------------------------------------------------------------------------------------------------------------------------------------------------------------------------------------------------------------------------------------------------------------------------------------------------------------------------------------------------------------…
SaT19783-R1 ---------------------------------------------------------------------------------------------------------------------------------------------------------------------------------------------------------------------------------------------------------------------------------------------------------------------------------------------------------------------------------------------------…
SaT20376-R1 ---------------------------------------------------------------------------------------------------------------------------------------------------------------------------------------------------------------------------------------------------------------------------------------------------------------------------------------------------------------------------------------------------…
SaT20456-R1 ---------------------------------------------------------------------------------------------------------------------------------------------------------------------------------------------------------------------------------------------------------------------------------------------------------------------------------------------------------------------------------------------------…
SaT22058-R1 ---------------------------------------------------------------------------------------------------------------------------------------------------------------------------------------------------------------------------------------------------------------------------------------------------------------------------------------------------------------------------------------------------…
SaT22488-R1 ----------------MHSYLPNQMKQTPKALFKLQRFVATDAPSTQSHRSPLEYYDQLLARPIIVPLWREECFGEYSQNYFYGNYEHTPTPKSKPYAGEQNVDVVAENIESLSFDDDADDAYDEEEDIDESDFSFSDSDSVAADTELGKPSTPTQSGKLCWAAGATLQKVKLKHYMDHIKELDSDVFKYLDAIDVEKWTLSYDSGVVTKGFFPLGWYNTRPGEWSTISLQGDPASQNGKSTNGKMVRGKIQMKRIENTTSRQVTFSKRR-NGLLK----------------------------------------------------------------------------KAYELSVLCDAEVALIIFSQSGRAYEFSSSDIQDT…
Abtio_SaG03765 ------------------------------------------------------------------------------------------------------------------------------------------------------------------------------------------------------------------------------------------------------------------------------------------------------------------------------------------------------------------------------------------------…
Abtio_SaG06022 ------------------------------------------------------------------------------------------------------------------------------------------------------------------------------------------------------------------------------------------------------------------------------------------------------------------------------------------------------------------------------------------------…
Abtio_SaG12132 ------------------------------------------------------------------------------------------------------------------------------------------------------------------------------------------------------------------------------------------------------------------------------------------------------------------------------------------------------------------------------------------------…
SaT00743-R1 ----------------M----------------------------------------------------------------------------------------------------------------------------------------------------------------------------------------------------------------------------------------------------------------------------------------------------------------------------------------------------------------------------------…
SaT01121-R1 ---------------------------------------------------------------------------------------------------------------------------------------------------------------------------------------------------------------------------------------------------------------------------------------------------------------------------------------------------------------------------------------------------…
SaT02641-R1 ---------------------------------------------------------------------------------------------------------------------------------------------------------------------------------------------------------------------------------------------------------------------------------------------------------------------------------------------------------------------------------------------------…
SaT04996-R1 ---------------------------------------------------------------------------------------------------------------------------------------------------------------------------------------------------------------------------------------------------------------------------------------------------------------------------------------------------------------------------------------------------…
SaT04997-R1 ---------------------------------------------------------------------------------------------------------------------------------------------------------------------------------------------------------------------------------------------------------------------------------------------------------------------------------------------------------------------------------------------------…
SaT05668-R1 ---------------------------------------------------------------------------------------------------------------------------------------------------------------------------------------------------------------------------------------------------------------------------------------------------------------------------------------------------------------------------------------------------…
SaT05699-R1 ---------------------------------------------------------------------------------------------------------------------------------------------------------------------------------------------------------------------------------------------------------------------------------------------------------------------------------------------------------------------------------------------------…
SaT05713-R1 ---------------------------------------------------------------------------------------------------------------------------------------------------------------------------------------------------------------------------------------------------------------------------------------------------------------------------------------------------------------------------------------------------…
SaT05729-R1 ---------------------------------------------------------------------------------------------------------------------------------------------------------------------------------------------------------------------------------------------------------------------------------------------------------------------------------------------------------------------------------------------------…
SaT05930-R1 ---------------------------------------------------------------------------------------------------------------------------------------------------------------------------------------------------------------------------------------------------------------------------------------------------------------------------------------------------------------------------------------------------…
SaT07474-R1 ---------------------------------------------------------------------------------------------------------------------------------------------------------------------------------------------------------------------------------------------------------------------------------------------------------------------------------------------------------------------------------------------------…
SaT07546-R1 ---------------------------------------------------------------------------------------------------------------------------------------------------------------------------------------------------------------------------------------------------------------------------------------------------------------------------------------------------------------------------------------------------…
SaT08982-R1 ---------------------------------------------------------------------------------------------------------------------------------------------------------------------------------------------------------------------------------------------------------------------------------------------------------------------------------------------------------------------------------------------------…
SaT09157-R1 ---------------------------------------------------------------------------------------------------------------------------------------------------------------------------------------------------------------------------------------------------------------------------------------------------------------------------------------------------------------------------------------------------…
SaT10288-R1 ---------------------------------------------------------------------------------------------------------------------------------------------------------------------------------------------------------------------------------------------------------------------------------------------------------------------------------------------------------------------------------------------------…
SaT11919-R1 ---------------------------------------------------------------------------------------------------------------------------------------------------------------------------------------------------------------------------------------------------------------------------------------------------------------------------------------------------------------------------------------------------…
SaT13424-R1 ---------------------------------------------------------------------------------------------------------------------------------------------------------------------------------------------------------------------------------------------------------------------------------------------------------------------------------------------------------------------------------------------------…
SaT14802-R1 ---------------------------------------------------------------------------------------------------------------------------------------------------------------------------------------------------------------------------------------------------------------------------------------------------------------------------------------------------------------------------------------------------…
SaT15374-R1 ---------------------------------------------------------------------------------------------------------------------------------------------------------------------------------------------------------------------------------------------------------------------------------------------------------------------------------------------------------------------------------------------------…
SaT15483-R1 ---------------------------------------------------------------------------------------------------------------------------------------------------------------------------------------------------------------------------------------------------------------------------------------------------------------------------------------------------------------------------------------------------…
SaT15620-R1 ---------------------------------------------------------------------------------------------------------------------------------------------------------------------------------------------------------------------------------------------------------------------------------------------------------------------------------------------------------------------------------------------------…
SaT16593-R1 ---------------------------------------------------------------------------------------------------------------------------------------------------------------------------------------------------------------------------------------------------------------------------------------------------------------------------------------------------------------------------------------------------…
SaT17710-R1 ---------------------------------------------------------------------------------------------------------------------------------------------------------------------------------------------------------------------------------------------------------------------------------------------------------------------------------------------------------------------------------------------------…
SaT18794-R1 ---------------------------------------------------------------------------------------------------------------------------------------------------------------------------------------------------------------------------------------------------------------------------------------------------------------------------------------------------------------------------------------------------…
SaT20374-R1 ---------------------------------------------------------------------------------------------------------------------------------------------------------------------------------------------------------------------------------------------------------------------------------------------------------------------------------------------------------------------------------------------------…
SaT20735-R1 ---------------------------------------------------------------------------------------------------------------------------------------------------------------------------------------------------------------------------------------------------------------------------------------------------------------------------------------------------------------------------------------------------…
SaT21037-R1 ---------------------------------------------------------------------------------------------------------------------------------------------------------------------------------------------------------------------------------------------------------------------------------------------------------------------------------------------------------------------------------------------------…
SaT21406-R1 ---------------------------------------------------------------------------------------------------------------------------------------------------------------------------------------------------------------------------------------------------------------------------------------------------------------------------------------------------------------------------------------------------…
SaT21728-R1 ---------------------------------------------------------------------------------------------------------------------------------------------------------------------------------------------------------------------------------------------------------------------------------------------------------------------------------------------------------------------------------------------------…
SaT22061-R1 ---------------------------------------------------------------------------------------------------------------------------------------------------------------------------------------------------------------------------------------------------------------------------------------------------------------------------------------------------------------------------------------------------…
SaT22213-R1 ---------------------------------------------------------------------------------------------------------------------------------------------------------------------------------------------------------------------------------------------------------------------------------------------------------------------------------------------------------------------------------------------------…
SaT23840-R1 ---------------------------------------------------------------------------------------------------------------------------------------------------------------------------------------------------------------------------------------------------------------------------------------------------------------------------------------------------------------------------------------------------…

## Sheet: MADS.MSA.fa.phy.trim
BsubMADS21	TGRGKIEIKRIENSTNRQVTFCKRRGGLLKKAYELSVLCDAEVSLIVFSNRGRLYEYANN-SVKATIDRYKKACADSSTNSEATAQYQQQSSKLRQEISKLQNSIRHMMGESLSTMNTKELKGLEKELERAISRIRSKNELLFAEIEYMQSESNQYLRKIAESSNYLV
BsubMADS23	MGRGRVELKRIEXKIXRQVTFAKRRXGLLKKAYELSVLCDAEVALIIFSXRGKLYEFCSTSXMLKTLERYQRCSYGTVDDTATEE-SFREYLKLKAKFEGLQRSQRXLLGEELGPLXTKELEHLERQLETSLKHIRSTTQXMLDQLSDLQVEIXRTLKKLDEQEAFLG
BsubMADS25	MGRGRVQLKRIEXKIXRQVTFSKRRTGLVKKAHEISVLCDAEVALIIFSXKGKLFEYSTDSCMESILERYERYSYPERQLTGPDSQWTVEYAKLKSRIELLQKSQRQILGEDLESLDLKQLHXLEQQMDTALKQIRSRXQLMHESISDLQQEQXXFLTQIKEQQIYLS
BsubMADS17	MARGKIQIKKIEXATXRQVTYSKRKXGLFKKAXELCVLCDARVSIIMFSGXXKLHDYISPSTTKQIYDHYQMSSGIDL----SHYEMQRDLKELQDTXXALQRETRQWXGESLDDLSMGELHGLEQDMDYSLGIIRDRVSLV--------------------------
BsubMADS18	MGRGKVEIKRIEXSTXRQVTYSKRKXGIFKKAAELTVLCDARISLIMFSKSGKYXEYMSPTTTKKIYDQYQKALDVDL----SHYEMQAELXKLKDIXGKLRREIRQRIGEELEGLXIRELIDLEKKIDDSFDIVRKRYEKLKTQTDITKLQRRRKMLHMXV--G-IG
BsubMADS20	MAREKIQIRKIDXATARQVTFSKRRRGLFKKAEELSILCDADIALIIFSATGKLFHYSSTSSMTEVLERHDLHSKXLAKMPSLELQECSXYSSLSKEISERSLQLRHMRGEQLQGLSIEELQELEQTLEAGLXSIIQKSQRILKEITDLEMKEXEKLKQVADEESILG
BsubMADS22	MARGKTQMRRIDXATSRQVTFSKRRXGLLKKAFELSVLCESEIALIIFSPKGKLYEFASS-SMPSIIDRYGQHMKDIVGGVEQTIQLEKDTESMIKKIELLQVSKWKLLGERLESCXISELQQIEKHLEKGVSSVRERVVLYREQITQLQLDETAILFKWKPQQ--LG
BsubMADS19	MGRGKIEIKRIEXSSSRQTTYTKRRXGLIKKATEISVLCDVEVALVIFSSTXVMHDYCSHPKIVDILDKYQXKSGKCL----TKHELHKELERLKKEXDSMRIKLSHFKGKDIXSLTHRELAEIEEILEXGLEXIREKTELFDMIEKX--DDEXKRLRYLXQ----L-
BsubMADS11	MGRVKLQIKKIDXITXRKVTFSKRRXGLIKKAYELSVLCDTDVALIMFSPSDRLTHFSGKRR----------------------------------------------------------------------------------SFSFPL------------------
BsubMADS4	TGRKKIEIKKLTSKEKRQVTFSKRRQGLIKKASELCILCGSQIAIFTXSPGXKVFSFGHP-SADVVVDRYLGEEESS-IKS-T-GAAAETYAETMKC---VEMERK----EKIEXMEVEELEIYMHALEDMGSKLKGIKTIXALE-----DDKEEAML-L--LL--YG
BsubMADS1	MGRAKLQLELIKXEKTRTTTFHKRKKGLLKKIYEFATLCDVDACMIIYDKXSXH-TW--PQSVIPIARRYKHLPPEDR----TRVSYKERLKKLGSELSRLQSSSASSR---LDXLSQGEMAEVATLIDSKAATRKRT---------------------------W--
BsubMADS2	MGRAKLQLELIKXEKTRTTTFHKRKKGLLKKIYEFATLCDVDACMIIYDKXSXH-TW--PQSVIPIARRYKHLPPEDR----SRVSYKERLKKLGSELSRLQSSSASSR---LDXLSQGEMAEVATLIDSKVQEVKAR-SLLKHS-----QQGE----QLEG---RIG
BsubMADS9	MTRKKVKLQWISXDSARKASLRKRRVSLVXKVKELSTLCGVEAAIVIYSPDEAE-VW--PSVAREMVSTFMEKSELET----KKVEMKERVSRVQSQLRKQCIKEMLVMGRXVDELSIEELSSVSWWIAEKKKEVXKR-QILQMVGQQQ-VQVRVVVGWFEESGG---
BsubMADS8	LGRQKIRMEKIAVKXHLQVTFSKRRSGLFKKASELSTLCGIHIAVVVFSPAKKVFSFGHP-DVDSLLQSFQTTTDFAEATARREAELXEEFSEVVGL---LEEERR---GASVEEMGILQLHQLRFHLEQLKKYTFVDEAVGVPR-----VDSRGA---FAC----GG
BsubMADS14	MGRGRVELKRIEXKIXRQVTFAKRRXGLLKKAYELSVLCDAEVAVIIFSXRGKLYEFCSSSSLCEEMWIHLAVLVGEAKVVVRAWVSLRSYSDFSIAVVALWRFFVSEDSEXVEP---------------------------------------------------LG
BsubMADS7	RGRQRIEMKMIDDKDXRLISFSKRRSGIYKKASELGTLCGAHSAIIIFSQSHKPFSFGFP-SVXSVIRRFFXILSHP-STAHRHILLXHHHXRLSDH---LXFQKR---SAGVEEMCMEQVTRLAAAVEEIEGRVLCRXEVKXAS-----SS-TSSIM--A-RA----
BsubMADS13	MGRVKLQIKKIDNITNRKVTFSKRRNGLIKKAYELSVLCDTDVALIMFSPSDRLTHFSGKRR----------------------------------------------------------------------------------SF----------------------
BsubMADS3	MGRAKLQLELIXKEKTRSTTFQKRKKGLIKKMYEFATLCDVDACMIIYDMXSXH-TW--PQSVIPIARRYKSLPPEDR----RRVSYGERLKKVESELSRLRSVSSSPR---LEKLAPGKMAEVAALIDSKLEEVKIR-SLLKRH-----QEGD----EVEG---CIG
BsubMADS10	MTRKKVKLAYITXDSSRKATFKKRKRGLMKKVCELSTLCDIDACAIIYSPYDTK-IW--PSGVQRVLTKFKKVPEIEQ----KKMELKQRLTKAKEQLRRQQRIRRCIMG-ILDGLSAIDLXDLGFLIDRXLKXIASR-KELSKXIPEV--QQIEDVK-MMXSXGF--
BsubMADS6	TGRKKIAIEKLESXEKRQVTFSKRRTGLTXKASELCILCGAEIAIITSSPRXRFFAFGHP-XVDSIVDRFLGVTQQH--EMEKEIEFGRRYLKALRE---LQTEKK---IMPIERMEVEELEEYMDAMXKMREKVSAADSFPTAA-----EEEEEAXX-I-D----YG
BsubMADS16	--KGKIEIKRIENSTNRQVTFCKRRGGLLKKAYELSVLCDAEVSLIVFSNRGRLYEYANN-SVKATIDRYKKACADSSTNSEATAQYQQQSSKLRQEISKLQNSIR--------------------------------------------------------------
BsubMADS12	MGRVKLKIKRLESSTNRQTTFSKRKHGIMKKAEELSILCDVDILLLMFSPSGKPLLFHGQRSFDEIVARFAQVSPQEREK---ELDLKKTFRKIDNHALILQAQLRRLSWSDEKVDNIEHLRHMEDSLRVSLEQIQLYDNFGKPDFIPLSQEGNQQMQEIRDDHNYL-
BsubMADS15	MGRGKVQLRRIESKTSRLVTFSKRRKGLLKKANELAVLCDVEVALIVFSEKGKLYEFSSKDSLKSLLQKYQ-IQLNTKDSNT--AAPITEI----TKSGIMETAQRLFDEKEIEMMKLTELVQLEQELSFMLKEIKLKEQQMEEEKQRME---------V--TT--L-
BsubMADS24	MGRGRVELKRIENKINRQVTFAKRRNGLLKKAYELSVLCDAEVAVIIFSNRGKLYEFCSSSSMLKTLERYQECNSGPPDTTAREEISKQEYLKLKAQYEALLQSKRKLQGEDIGSLTGKELESLEKKLDVSLKQIRSTTQYMLDELTQLQSEANKTLQRLVEAQGFLG
BsubMADS5	HRRKKIEIKKLISKEKRQVTFSKRRQGLIKKASELCILCGSQIAIFTXSPGXKVFSFGHP-SADVVVDRYFGEESTS-TTSTR-GVAAETYAEALKH---VEMERK----EXIEKMEMEELEMYMHALEDMGSXLKEKRMKXVSE-----DEKEEAML-F--LP--FG
BgloMADS11	MGRVKLKIKRLESSTXRQTTFSKRKHGIMKKAEELSILCDVDILLLMFSPSGKPLLFHGQRSFDEIVARFAQVSPQEREK---EIQWIYEFRFFSXHALILQAQLRRLSWSDEKVDXIEHLRCMEDSLRISLEQIKLCDXFGKQDFIPLSQEGXQHMQEIRD------
BgloMADS2	MGRAKLQLELIKKEKTRSTTFHKRKKGLIKKMYEFATLCDVDACMIIYNMNSHH-TW--PQSVIPIARRYKSLPPEDR----RRVSYGERLKKVDSELSRLRSAAASAR---LDKLAPGEMAEVASLIDSKLQEVKVR-SLLKH------------------------
BgloMADS1	MGRAKLQLELIKKEKTRSTTFHKRKKGLIKKMYEFATLCDVDACMIIYXMXSHH-TW--PQSVIPIARRYKSLPPEDR----RRVSYGERLKKVDSELSRLRSAAASAR---LDKLAPGEMAEVASLIDSKLQEVKVR-SLLKHR-----QQGE----DLEG---CIG
BgloMADS8	TGRKKIAIEKLESXEKRQVTFSKRRTGLTXKASELCILCGAEIAIITSSPRXRFFAFGHP-XVDSIVDRFLGVTQQK---VQKEIDFGRRYLKALRE---LQTEKK---ITPIERMEVEELEEYMDAMXKMRERVAAADSFPTDM-----EEEEHXHL-I-D----YG
BgloMADS3	MTRKKVKLQWISXDSARKASLRKRRVSLVXKVKELSTLCGVEAAIVIYSPDEGE-VW--PSVAREMVKTFMEKSELET----KKVEMKERVSRVQSQLRKQCRKEMLVMGKSVDELTIDELSSVSWWVAEKKKEVHKR-QILHMV-QQK-VHVR-VGGWFEESXS---
BgloMADS6	LGRQKIRMEKIAVKXHLQVTFSKRRSGLFKKASELSTLCGIHIAVVVFSPAKKVFSFGHP-DVDSLLESFQASSDPAEATARREAELXEEFSEVVGM---LEEERR---GASVEEMGILQLHQLRFHLEQLKKYTIVDDAVVVP--------P------LAC----FG
BgloMADS4	MTRKKVKLQWISXDSARKASLRKRRVSLVXKVKELSTLCGVEAAIVIYSPDEGE-VW--PSVAREMVKTFMEKSELET----KKVEMKERVSRVQSQLRKQCRKEMLVMGKSVDELTIDELSSVSWWVAEKKKEVHKR-QILHMV-QQS-------------SV----
BgloMADS20	MARGKTQMRRIDXATSRQVTFSKRRXGLLKKAFELSVLCESEIALIIFSPKGKLYEFASS-SMPSIIDRYGQHMKDIVGGVEQTIQLEKDTESMIKKIELLQVSKWKLLGERLESCXISELQQMEKHLEKGVSSVRERVVLYREQITQLQLDETAVLFKWKPQQ--LG
BgloMADS21	MGRGRVELKRIEXKIXRQVTFAKRRXGLLKKAYELSVLCDAEVALIIFSXRGKLYEFCSTSXMLKTLERYQRCSYGTVDDTATEEQSFREYLKLKAKFEGLQRSQRXLLGEELGPLXTKELEHLERQLETSLKHIRSTTQXMLDQLSDLQVEIXRTLKKLDEQEAFLG
BgloMADS23	MGRGRVQLKRIEXKIXRQVTFSKRRTGLVKKAHEISVLCDAEVALIIFSXKGKLFEYSTDSCMESILERYERYSYPERQLSGPDSQWTVEYAKLKSRIELLQKSQRQILGEDLESLDLKQLHXLEQQMDTALKQIRSRXQLMHESISDLQYXIXTLM-QIKEQQIYLS
BgloMADS14	MGRGKVEIKRIEXSTXRQVTYSKRKXGIFKKAAELTVLCDARISLIMFSKSGKYXEYMSPTTTKKIYDQYQKALDVDL----SHYEMQAELXKLKDIXGKLRREIRQRIGEELEGLXIRELIDLEKKIDDSFDIVRKRVXITILXLEA-------LIIKYD-----LH
BgloMADS18	MGRGKIEIKRIEXTTXRQVTFCKRRXGLLKKAYELSVLCETEVALIVFSTRGRLYEYAXX-STKSTIERYRRAXSSKM--EELXVQYDQESEKLRQHIQILHXTSRHMMGDSLCTMPPKELKQLESRLEKGISRIRAK----------VX----------------L-
BgloMADS19	TGRGKIEIKRIEXSTXRQVTFCKRRGGLLKKAYELSVLCDAEVSLIVFSXRGRLYEYAXX-SVKATIDRYKKACADSSTXSEATAQYQQQSSKLRQEISKLQXSSRHMMGESLSTMXTKELKGLEKELERAISRIRSKXELLFAEIEYMQSESXQYLRKIAESSXYLV
BgloMADS15	MGRGKIEIKRIEXSSSRQTTYTKRRXGLIKKATEISVLCDVEVALVIFSSTXVMHDYCSHPKIVDILDKYQXKSGKCL----AKHELHKELERLKKEXDSMRIKLSHFKGKDIXSLTHRELAEIEEILEXGLEXIREKTELFDMIEKX--DDEXKRLRYLXQ----L-
BgloMADS17	MAREKIQIRKIDNATARQVTFSKRRRGLFKKAEELSILCDADIALIIFSATGKLFHYSSTSSMTEILERHDLHSKNLAKMPSLELQECSNYSSLSKEISERSLQLRHMRGEQLQGLNIEELQELEQTLEVGLNSIIQKSQRILKEITDLEMKENEKLKQVADDESILG
BgloMADS22	MGRGRVELKRIENKINRQVTFAKRRNGLLKKAYELSVLCDAEVAVIIFSNRGKLYEFCSSSSMLKTLERYQECNSGPPDTSAREEISKQEYLKLKAQYEALLQSKRKLQGEDIGSLTGKELESLEKKLDVSLKQIRSTTQYMLDELTQLQSEANKTLQRLVEAQDFLG
BgloMADS5	RGRQRIEMKMIDDKDNRLISFSKRRSGIYKKASELGTLCGAHSAIIIFSQSHKPFSFGFP-SVNSVICRFFNILSHP-STAHRHILLNHHHNRLSDH---LHLQKS---SAGVEEMCMEEVTRLAAAVEDIEGRIVCRNELKNA-------S-TSS-M--A-MG--FG
BgloMADS10	MGRVKLKIKRLESSTNRQTTFSKRKHGIMKKAEELSILCDVDILLLMFSPSGKPLLFHGQRSFNKSYPTFFFLPPLLFFS---NIS------RCGGSSWLVRSCF---SWSDEKVDNIEHLRCMED-LRISLEQIKLCDNFGKQDFIPLSQEGNQHMQEIRDDHNYL-
BgloMADS9	MGRVKLKIKRLESSTNRQTTFSKRKHGIMKKAEELSILCDVDILLLMFSPSGKPLLFHGQR-----------------------------------------------SWSDEKVDNIEHLRCMEDSLRISLEQIKLCDNFGKQDFIPLSQEGNQHMQEIRDDHNYL-
BgloMADS7	TGRKKIEIKKLTSKEKRQVTFSKRRHGLIKKASELCILCGSQIAIFTTSPGNKVFSFGHP-SADVVVDRYLGEEPTS-TS----GEAAETYAEAMKY---VEMERK----EKIDKMEMEELEMYMHALEDMGSKLKMVTMINVLE-----DDKEDAML-L--LP----
BgloMADS13	MGRVKLQIKKIDNITNRKVTFSKRRNGLIKKAYELSVLCDTDVALIMFSPSDRLTHFSGKRRMEEVLEDYMKLASNEM-VQHSNVEVQQEVINMQQHIYLVDQKLRLYQPDLADFTSLQELESCEKNVYATLGRVVQRNDLLSQSFYPYYKEENADN-----------
BgloMADS16	MARGKIQIKKIENATNRQVTYSKRKNGLFKKANELCVLCDARVSIIMFSGNNKLHDYISPSTTKQIYDHYQRSSGVDL----SHYEMQRDLKELQDANNALQRETSRWNGESLDDLSMGELHGLEQDMDYSLGIIRDRDQLIGSQTEKWKEQIQSDLLKIMQ--GGL-
BgloMADS12	MGRGKVQLRRIESKTSRLVTFSKRRKGLLKKANELAVLCDVEVALIVFSEKGKLYEFSSKDSLKSLLQKYQ-IQLNTKDSNT--AAPITEIC--WTKSGIMETAQRLFDEREIEMMKLTELIQLEQELSFMLKEIKLKDTTMN---LVREILPI--------NF---A
STKY10412	RGRQRIEMKMIDDKDNRLISFSKRRSGIYKKASELGTLCGAHSAIIIFSQSHKPFSFGFP-SVNSVIRRFFNILSHP-STAHRHILLNHHHNRLSDH---LHLQKL---ADGVEEMCMEELTRLGAAVEEIEGRVVCRNELKN-------------------------
STKY1198	TGRGKIEIKRIENSTNRQVTFCKRRGGLLKKAYELSVLCDAEVSLIVFSNRGRLYEYANN-SVKATIDRYKKACADSSTNSEATAQYQQQSSKLRQEISKLQNSIRHMMGESLSTMNTKELKGLEKELERAISRIRSKNELLFAEIEYMQSESNQYLRKIAESSNYLV
STKY1199	TGRGKIEIKRIENSTNRQVTFCKRRGGLLKKAYELSVLCDAEVSLIVFSNRGRLYEYANN-SVKATIDRYKKACADSSTNSEATAQYQQQSSKLRQEISKLQNSIRHMMGESLSTMNTKELKGLEKELERAISRIRSKNELLFAEIEYMQSESNQYLRKIAESSNYLV
STKY1200	TGRGKIEIKRIENSTNRQVTFCKRRGGLLKKAYELSVLCDAEVSLIVFSNRGRLYEYANN-SVKATIDRYKKACADSSTNSEATAQYQQQSSKLRQEISKLQNSIRHMMGESLSTMNTKELKGLEKELERAISRIRSKNELLFAEIEYMQSESNQYLRKIAESSNYLV
STKY4986	MGRGKIEIKRIENSSSRQTTYTKRRNGLIKKATEISVLCDVEVALVIFSSTNVMHDYCSHPRIVDILDKYQNKSGKCL----TKHELHKELERLKKENDSMRIKLSHFKGKDINSLTHRELAEIEEILENGLENIREKTELFDMIEKN--DDENKRLRYLNQ----L-
STKY4987	MGRGKIEIKRIENSSSRQTTYTKRRNGLIKKATEISVLCDVEVALVIFSSTNVMHDYCSHPRIVDILDKYQNKSGKCL----TKHELHKELERLKKENDSMRIKLSHFKGKDINSLTHRELAEIEEILENGLENIREKASY---------------------------
STKY6327	MTRKKVKLAYITNDSSRKATFKKRKRGLMKKVCELSTLCDIDACAIIYSPYDTK-IW--PSGVQRVLTKFKKVP----------------------------------------------------------------------------------------------
STKY6328	MTRKKVKLAYITNDSSRKATFKKRKRGLMKKVCELSTLCDIDACAIIYSPYDTK-IW--PSGVQRVLTKFKKVPEIEQ----KKMELKQRLAKAKEQLRKQQRIRRCIMG-ILDGLSAIDLNDLGFLIDRNLKNIASR-KELSK------------------------
STKY6560	MGRVKLQIKKIDNITNRKVTFSKRRNGLIKKAYELSILCDTDVALIMFSPSDRLTHFSGKRRMEEVLEDYIKLAASEM-VSHSNIEVQQEVINMQQHIYLVDQKLRSYQPDVADFTSLQELESCEKNVYAMLGRVVQRNDLLSQSFYPYYKEENADN-----------
STKY6561	MGRVKLQIKKIDNITNRKVTFSKRRNGLIKKAYELSILCDTDVALIMFSPSDRLTHFSGKRRMEEVLEDYIKLAASEM-VSHSNIEVQQEVINMQQHIYLVDQKLRSYQPDVADFTSLQELESCEKNVYAMLGRVVQR------------------------------
STKY6562	MGRVKLQIKKIDNITNRKVTFSKRRNGLIKKAYELSILCDTDVALIMFSPSDRLTHFSGKRR----------------------------------------------------------------------------------------------------------
STKY70836	TGRKKIAIEKLQSNEKRQVTFSKRRTGLTNKASELCILCGVEIAIITSSPRNRFFAFGHP-NVDTIVDRFLGSPQEE---VEKKIEFGRRYLKALRE---LQTERK---IMPIERM----------------------------------------------------
STKY75111	MGRGKVEIKRIENSTNRQVTYSKRKNGIFKKAAELTVLCDARISLIMFSKSGKYNEYMSPTTTKKIYDQYQKALDVDL----SHYEMQAELNKLKDINGKLRREIRQRIGEELEGLNIRELIDLEKKIDDSFVIVRKRYEKLKTQTDITKLQRRRKMLHMNV--G-IG
STKY75780	MAREKIQIRKIDNATARQVTFSKRRRGLFKKAEELSILCDADIALIIFSATGKLFHYSSTSSMTEILERHNLHSKNLAKMPSLELQECSNYSSLSKEISERSLQLRHMRGEQLQGLNIEELQELEQTLEVGLNSIIQKSQRILKEITDLEMKENEKLKQVADEESILG
STKY75913	MARGKTQMRRIDNATSRQVTFSKRRNGLLKKAFELSVLCESEIALIIFSPKGKLYEFASS-SMPSIIDRYGQHMKDIVGGVEQTIQLEKDTESMIKKIELLQVSKWKLLGERLESCNISELQQMEKHLEKGVSSVRERVVLYREQITQLQLDETAILFKWKPQQ--LG
STKY76815	MGRGKVQLRRIESKTSRLVTFSKRRKGLLKKANELAVLCDVEVALIVFSEKGKLYEFSSKDSLKSLLQKYQ-IQLNTKDSNT--AAPITEI----TKSGIMETAQRLFDEKEIEMMKLTELIQLEQELSFMLKEIKLKEEQMEEEKQRME------------------
STKY77699	MGRVKLKIKRLESSTNRQTTFSKRKHGIMKKAEELSILCDVDILLLMFSPSGKPLLFHGQRSFDEIVARFAQVPPQEREK---ELDLKKTFRKIDNHALILQAQLRRLSWSDEKIDNIEHLRHMEDSLRVSLEQIQLCDNFGKQDFIPLRQEGNQHMQEIRD------
STKY9026	MARGKIQIKKIENATNRQVTYSKRKNGLFKKANELCVLCDARVSIIMFSGNNKLHDYISPSTTKQIYDHYQRSSGIDL----SHYEMQRDLKELQDANNALHRETRQWHGKSLDDLSMGELHGLEQDMDYSLGIIRDRDQLIGGQTEKWKEQRQADLV----------
STKY9690	MGRGRVELKRIENKINRQVTFAKRRNGLLKKAYELSVLCDAEVAVIIFSNRGKLYEFCSSSSMLKTLERYQECNSGPPDTSAREEISKQEYLKLKAQYEALLQSKRKLQGEDIGSLTGKELESLEKKLDLSLKQIRSTTQYMLDELTQLQSEANKTLQRLVEAQGFLG
STKY9830	MGRGRVELKRIENKINRQVTFAKRRNGLLKKAYELSVLCDAEVALIIFSNRGKLYEFCSTSNMLKTLERYQRCSYGTVDDTATEE-SFREYLKLKTKFEGLQRSQRNLLGEELGPLNTKELEHLERQLETSLKHIRSTTQNMLDQLSDLQVEINRTLKKLDEQEAFLG
Aqcoe0058s0001.1	----------MRDHVVRKNSYRRRKNNLVKKADELSKLCAVKACAIIYNPYDPI-VW--PSEARR---QFLTLPDNMQ----RKFELKQQIVKLEGKLERAEKSREDLIGEVLHGLKHEDVLDMECYIEQRMKEIYET--------------ELGYYGQLAD------
AT1G24260.2_SEP3	MGRGRVELKRIENKINRQVTFAKRRNGLLKKAYELSVLCDAEVALIIFSNRGKLYEFCSSSSMLRTLERYQKCNYGAPEPPSREELSQQEYLKLKERYDALQRTQRNLLGEDLGPLSTKELESLERQLDSSLKQIRALTQFMLDQLNDLQTETNKTLRRLADQQAFLG
AT1G26310.1_CAL	MGRGRVELKRIENKINRQVTFSKRRTGLLKKAQEISVLCDAEVSLIVFSHKGKLFEYSSESCMEKVLERYERYSYAERQLPDSHVNWSMEYSRLKAKIELLERNQRHYLGEELEPMSLKDLQNLEQQLETALKHIRSRNQLMNESLNHLQQEENSMLTQIKEQLPQLG
AT1G31140.2_GOA	MRKGKRVIKKIEEKIKRQVTFAKRKKSLIKKAYELSVLCDVHLGLIIFSHSNRLYDFCSNSSMENLIMRYQKEKEGQTTA--SD-QCVKTKESMMREIENLKLNLQLYDGHGLNLLTYDELLSFELHLESSLQHARARSEFMHQQQQQQTKEQWEQLMQ-AE----LG
AT1G69120.1_AP1	MGRGRVQLKRIENKINRQVTFSKRRAGLLKKAHEISVLCDAEVALVVFSHKGKLFEYSTDSCMEKILERYERYSYAERQLPESDVNWSMEYNRLKAKIELLERNQRHYLGEDLQAMSPKELQNLEQQLDTALKHIRTRNQLMYESINELQQEQNSMLSQIKEQQPPLG
AT1G71692.1_AGL12	MARGKIQLKRIENPVHRQVTFCKRRTGLLKKAKELSVLCDAEIGVVIFSPQGKLFELATKGTMEGMIDKYMKCTGGGRGSTAQELQPKDEINVLKQEIEMLQKGISYMFGGGDGAMNLEELLLLEKHLEYWISQIRSAMDVMLQEIQSLRKNTNKYLLKIEE--NYI-
AT1G77080.4_MAF1	MGRRKIEIKRIENKSSRQVTFSKRRNGLIDKARQLSILCESSVAVVVVSASGKLYDSSSGDDISKIIDRYEIQHADELRA----L-LEEKIQNYLPHKELLETVQSKLEEPNVDNVSVDSLISLEEQLETALSVSRARAELMMEYIESLKREENQVLAQMGKGS--L-
AT2G03710.1_SEP4	MGRGKVELKRIENKINRQVTFAKRRNGLLKKAYELSVLCDAEIALLIFSNRGKLYEFCSSSGMARTVDKYRKHSYATMDPSAKDLQKYQDYLKLKSRVEILQHSQRHLLGEELSEMDVNELEHLERQVDASLRQIRSTARSMLDQLSDLKLETNRDLRKLEDPPGFLS
AT2G14210.1_AGL44	MGRGKIVIRRIDNSTSRQVTFSKRRSGLLKKAKELSILCDAEVGVIIFSSTGKLYDYASN-SSKTIIERYNRVKEEQHQLHASEIKWQREVASLQQQLQYLQECHRKLVGEELSGMNANDLQNLEDQLVTSLKGVRLKDQLMTNEIRELNQKENHELQIVMRGNPILI
AT2G22540.1_SVP	MAREKIQIRKIDNATARQVTFSKRRRGLFKKAEELSVLCDADVALIIFSSTGKLFEFCSS-SMKEVLERHNLQSKNLEKLPSLELQENSDHARMSKEIADKSHRLRQMRGEELQGLDIEELQQLEKALETGLTRVIETSDKIMSEISELQMDENKRLRQGTQEESILG
AT2G22630.1_AGL17	MGRGKIVIQKIDDSTSRQVTFSKRRKGLIKKAKELAILCDAEVCLIIFSNTDKLYDFASS-SVKSTIERFNTAKMEEQELPASEVKWQREAETLRQELHSLQENYRQLTGVELNGLSVKELQNIESQLEMSLRGIRMKEQILTNEIKELTHHENLELSKVIHGLAVLS
AT2G42830.2_SHP2	IGRGKIEIKRIENTTNRQVTFCKRRNGLLKKAYELSVLCDAEVALVIFSTRGRLYEYANN-SVRGTIERYKKACSDAVNPTEANTQYQQEASKLRRQIRDIQNLNRHILGESLGSLNFKELKNLESRLEKGISRVRSKHEMLVAEIEYMQQNDNMYLRKITEQSNYLV
AT2G45650.1_AGL6	MGRGRVEMKRIENKINRQVTFSKRRNGLLKKAYELSVLCDAEVALIIFSSRGKLYEFGSV-GIESTIERYNRCYNCSLSNPEETTQWCQEVTKLKSKYESLVRTNRNLLGEDLGEMGVKELQALERQLEAALTATRQRTQVMMEEMEDLRGDINKQLKKFEEEP--LG
AT2G45660.1_AGL20	MVRGKTQMKRIENATSRQVTFSKRRNGLLKKAFELSVLCDAEVSLIIFSPKGKLYEFASS-NMQDTIDRYLRHTKDRVSTSEENMQLKYEAANMMKKIEQLEASKRKLLGEGIGTCSIEELQQIEQQLEKSVKCIRARTQVFKEQIEQLKAAENEKLSKWHEDE--LG
AT3G02310.1_SEP2	MGRGRVELKRIENKINRQVTFAKRRNGLLKKAYELSVLCDAEVSLIVFSNRGKLYEFCSTSNMLKTLERYQKCSYGSIEVPAKELESYREYLKLKGRYENLQRQQRNLLGEDLGPLNSKELEQLERQLDGSLKQVRCITQYMLDQLSDLQLDANRALSKLEDPQGLLG
AT3G30260.1_AGL79	MGRGRVQLRRIENKIRRQVTFSKRRTGLVKKAQEISVLCDAEVALIVFSPKGKLFEYSAGSSMERILDRYERSAYAGQDIPNLDSQCSTECSKLLRMIDVLQRSLRHLRGEEVDGLSIRDLQGVEMQLDTALKKTRSRNQLMVESIAQLQKELKKQLTKAGE--PFLG
AT3G54340.1_AP3	MARGKIQIKRIENQTNRQVTYSKRRNGLFKKAHELTVLCDARVSIIMFSSSNKLHEYISPNTTKEIVDLYQTISDVDV----TQYEMQETKRKLLETNRNLRTQIKQRLGECLDELDIQELRRLEDEMENTFKLVRERFKSLGNQIETTKQDIQKNLIELEL--GYLP
AT3G57230.1_AGL16	MGRGKIAIKRINNSTSRQVTFSKRRNGLLKKAKELAILCDAEVGVIIFSSTGRLYDFSSS-SMKSVIERYSDAKGETSSEPASEIQWQKEAAILKRQLHNLQENHRQMMGEELSGLSVEALQNLENQLELSLRGVRMKDQMLIEEIQVLNHQENLDLHKVMHIAGLLS
AT3G57390.1_AGL18	MGRGRIEIKKIENINSRQVTFSKRRNGLIKKAKELSILCDAEVALIIFSSTGKIYDFSSV-CMEQILSRYGYTTASTEHKREHQAEVLRNDDSMKGELERLQLAIERLKGKELEGMSFPDLISLENQLNESLHSVKDQTQILLNQIERSRLEENQILRQVEMES--LG
AT3G58780.3_SHP	LGRGKIEIKRIENTTNRQVTFCKRRNGLLKKAYELSVLCDAEVALVIFSTRGRLYEYANN-SVRGTIERYKKACSDAVNPTEANTQYQQEASKLRRQIRDIQNSNRHIVGESLGSLNFKELKNLEGRLEKGISRVRSKNELLVAEIEYMQQHNNMYLRKIAEQSNYLV
AT3G61120.1_AGL13	MGRGKVEVKRIENKITRQVTFSKRKSGLLKKAYELSVLCDAEVSLIIFSTGGKLYEFSNV-GVGRTIERYYRCKDNLLDN-E-DTQLRQEVTKLKCKYESLLRTHRNLVGEDLEGMSIKELQTLERQLEGALSATRKQTQVMMEQMEELRGDINNKLKETEDQS--LG
AT4G09960.3_STK	MGRGKIEIKRIENSTNRQVTFCKRRNGLLKKAYELSVLCDAEVALIVFSTRGRLYEYANN-NIRSTIERYKKACSDSTNTQEINAAYQQESAKLRQQIQTIQNSNRNLMGDSLSSLSVKELKQVENRLEKAISRIRSKHELLLVEIENAQDNENIYLRKVAEEANYLG
AT4G11880.1_AGL14	MVRGKTEMKRIENATSRQVTFSKRRNGLLKKAFELSVLCDAEVALIIFSPRGKLYEFSSS-SIPKTVERYQKRIQDLG-SRNDNSQSKDETYGLARKIEHLEISTRKMMGEGLDASSIEELQQLENQLDRSLMKIRAKYQLLREETEKLKIAENKMLMKCQGLD--LG
AT4G18960.1_AG	SGRGKIEIKRIENTTNRQVTFCKRRNGLLKKAYELSVLCDAEVALIVFSSRGRLYEYSNN-SVKGTIERYKKAISDNSNTAEINAQYQQESAKLRQQIISIQNSNRQLMGETIGSMSPKELRNLEGRLERSITRIRSKNELLFSEIDYMQHNDNQILRKIAEQSNYLV
AT4G22950.1_AGL19	MVRGKTEMKRIENATSRQVTFSKRRNGLLKKAFELSVLCDAEVALVIFSPRSKLYEFSSS-SIAATIERYQRRIKEIG-NRNDNSQARDETSGLTKKIEQLEISKRKLLGEGIDACSIEELQQLENQLDRSLSRIRAKYQLLREEIEKLKVKENKDLKKWMGVN--LG
AT4G24540.1_AGL24	MAREKIRIKKIDNITARQVTFSKRRRGIFKKADELSVLCDADVALIIFSATGKLFEFSSS-RMRDILGRYSLHASNINKLPSTHLRENCNLSRLSKEVEDKTKQLRKLRGEDLDGLNLEELQRLEKLLESGLSRVSEKGECVMSQIFSLEVDENKRLRKLETKESVLG
AT4G37940.1_AGL21	MGRGKIVIQRIDDSTSRQVTFSKRRKGLIKKAKELAILCDAEVGLIIFSSTGKLYDFASS-SMKSVIDRYNKSKIEQQQLPASEVKWQREAAVLRQELHALQENHRQMMGEQLNGLSVNELNSLENQIEISLRGIRMREQLLTQEIQELSHQENLDLSKVIHFT--LS
AT5G10140.1_FLC	MGRKKLEIKRIENKSSRQVTFSKRRNGLIEKARQLSVLCDASVALLVVSASGKLYSFSSGDNLVKILDRYGKQHADDLKA----L-HQSKALNYGSHYELLELVDSKLVGSNVKNVSIDALVQLEEHLETALSVTRAKTELMLKLVENLKKEENQVLAQMENAG--L-
AT5G13790.1_AGL15	MGRGKIEIKRIENANSRQVTFSKRRSGLLKKARELSVLCDAEVAVIVFSKSGKLFEYSST-GMKQTLSRYGNHQSSSA----SKAEDCAEVDILKDQLSKLQEKHLQLQGKGLNPLTFKELQSLEQQLYHALITVRERERLLTNQLEESRELENETLRQVQEDPSLLG
AT5G15800.2_SEP1	MGRGRVELKRIENKINRQVTFAKRRNGLLKKAYELSVLCDAEVALIIFSNRGKLYEFCSSSNMLKTLDRYQKCSYGSIEVPAKELESYREYLKLKGRYENLQRQQRNLLGEDLGPLNSKELEQLERQLDGSLKQVRSITQYMLDQLSDLQLETNRALAKLDDHQGLLG
AT5G20240.1_PI	MGRGKIEIKRIENANNRVVTFSKRRNGLVKKAKEITVLCDAKVALIIFASNGKMIDYCCPSDLGAMLDQYQKLSGKKL----AKHELSNEIDRIKKENDSLQLELRHLKGEDIQSLNLKNLMAVEHAIEHGLDKVRDHMEILISKRRN--AEEQRQLTQLQQ----L-
AT5G23260.2_AGL32	MGRGKIEIKKIENQTARQVTFSKRRTGLIKKTRELSILCDAHIGLIVFSATGKLSEFCSEQRMPQLIDRYLHTNGLRL--PDHDDQLHHEMELLRRETCNLELRLRPFHGHDLASIPPNELDGLERQLEHSVLKVRERNELMQQQLENLSEEDNNNMYWLHEEQSVL-
AT5G51860.1_AGL72	MVRGKIEIKKIENVTSRQVTFSKRRSGLFKKAHELSVLCDAQVAAMIFSQKGRLYEFASS-DIRNTIKRYAEYKREYFVAIEQYVQLKKEMVTMVKKIEVLEVHNRKMMGQSLDSCSVKELSEIATQIEKSLHMVRLRAKLYEDELQKLKKDERVRL-----SG--LG
AT5G51870.3_AGL71	MVRGKIEIKKIENVTSRQVTFSKRRSGLFKKAHELSVLCDAQVAAIVFSQSGRLHEYSSS-QMEKIIDRYGKFSNAFYVAPERYLQLKMEIDRMVKKIDLLEVHHRKLLGQGLDSCSVTELQEIDTQIEKSLRIVRSRAELYADQLKKLKLNERKRLLE-REEG--LG
AT5G60910.1_AGL8	MGRGRVQLKRIENKINRQVTFSKRRSGLLKKAHEISVLCDAEVALIVFSSKGKLFEYSTDSCMERILERYDRYLYSDKQLRDVSQSWVLEHAKLKARVEVLEKNKRNFMGEDLDSLSLKELQSLEHQLDAAIKSIRSRNQAMFESISALQQDHNNSLLKIKEQLSVVG
AT5G62165.1_AGL42	MVRGKIEMKKIENATSRQVTFSKRRNGLLKKAYELSVLCDAQLSLIIFSQRGRLYEFSSS-DMQKTIERYRKYTKDHETSSQIHLQLKQEASHMITKIELLEFHKRKLLGQGIASCSLEELQEIDSQLQRSLGKVRERAQLFKEQLEKLKLEENVKLHKNNPYK--LG
AT5G65050.3_AGL31	MGRKKVEIKRIENKSSRQVTFSKRRNGLIEKARQLSILCESSIAVLVVSGSGKLYKSASGDNMSKIIDRYEIHHADELEA----L-LAEKTRNYLPLKELLEIVQSKLEESNVDNASVDTLISLEEQLETALSVTRARTELMMGEVKSLQREENQTLAQVGKEN--L-
AT5G65060.1_MAF3	MGRRKVEIKRIENKSSRQVTFSKRRKGLIEKARQLSILCESSIAVVAVSGSGKLYDSASGDNMSKIIDRYEIHHADELKA----L-LAEKIRNYLPHKELLEIVQSKLEESNVDNVSVDSLISMEEQLETALSVIRAKTELMMEDMKSLQIEENQILAQVGKEN--L-
AT5G65070.3_MAF4	MGRRKVEIKRIENKSSRQVTFCKRRNGLMEKARQLSILCESSVALIIISATGRLYSFSSGDRMAKILSRYELEQADDLKT----L-LEEKTLNYLSHKELLETIQCKIEEAKSDNVSIDCLKSLEEQLKTALSVTRARTELMMELVKTHQREENQSLTQLIKES--L-
AT5G65080.1_MAF5	MGRRRVEIKRIENKSSRQVTFCKRRNGLMEKARQLSILCGSSVALFIVSSTGKLYNSSSGDSMAKIISRFKIQQADDPET----L-LEDKTQDYLSHKELLEIVQRKIEEAKGDNVSIESLISMEEQLKSALSVIRARTELLMELVKNLQKEKNKVLAEVGKEN--L-
AT1G18750.1_AGL65	MGRVKLKIKRLESTSNRQVTYTKRKNGILKKAKELSILCDIDIVLLMFSPTGRATAFHGEHCIEEVISKFAQLTPQERTK---ELELKKTFKKLDNQVAIYQAQLRRLSWTNDRIENTEHLDLLEESLRKSIERIQIHEHYRKNQLLPIEQE--DH-QDLREEDMY--
AT1G22130.1_AGL104	MGRVKLEIKRIENTTNRQVTFSKRRNGLIKKAYELSILCDIDIALIMFSPSDRLSLFSGKTRIEDVFSRFINLPKQER-PINSDVELEHEVCRLQQQLQMAEEELRRYEPDPIRFTTMEEYEVSEKQLLDTLTHVVQRDHLMSNHLSSYE--ENGTNQHLREAQ--I-
AT1G69540.1_AGL94	MGRVKLKIKKLQNMNGRQCTYTKRRHGIMKKAKELSILCDIDVVLLMFSPMGKASICIGKHSIGEVIAKFAQLSPQERAK---ELELRKTFMKANEKIRFLQTQLTRLSWTDDNIDSVDVLQQLEHSLRQSLAQIYGRASMQQQQLMSSQQQENMN--EQKDNDDYV-
AT1G77950.1_AGL67	MGRVKLELKRIEKSTNRQITFSKRKKGLIKKAYELSTLCDIDLALLMFSPSDRLCLFSGQTRIEDVLARYINLPDQERRPTNSNVELEQEVCRLQQQLQISEEELRKFEPDPMRLTSMEEIEACEANLINTLTRVVQREHLLRK---SCE--EPEPKQHM--------
AT1G77980.1_AGL66	MGRVKLEIKRIENTTNRQVTFSKRRNGLIKKAYELSILCDIDIALLMFSPSDRLSLFSGKTRIEDVFSRYINLSDQER-PINSDVELEHEVYKLQQQLLMAEEELRKYEPDPIRFTTMEEYETCEKQLMDTLTRVNQREHILSQQLSSYEG-ENGPNEHL--AQTLI-
AT2G03060.2_AGL30	MGRVKLKIKKLENTNGRQSTFAKRKNGILKKANELSILCDIDIVLLMFSPTGKAAICCGTRSMEEVIAKFSQVTPQERTK---ELELKKTFQKLDTQARILQARIGRLSWTEDKINNVEHLGQLEISIRQSLDQLRAHEHFQQQQAMQIEQQNTTN--EIRENDEYI-
AT2G26320.1_AGL33	MGRKKLKLKRIESLKERSSKFSKRKKGLFKKAEEVALLCDSDIMLIVVSPTEKPTVFNTRSSFHTILERFCMLSLQEREE--------------------------------------------------------------------------------------I-
AT1G01530.1_AGL28	LGRRKIELVKMTNESNLQVTFSKRRSGLFKKGSELCTLCDAEIAIIVFSPSGKAYSFGHP-NVNKLLDHSLGRVI---NNSRTKIMLNESLTEVMAE---KEKEQT---KQSPTELNLAQSTSMKCDLEALKKEVDEKAQLHHR---------------YGS--GFFG
AT1G17310.1_AGL100	RGRQKIEIKKIEEETKRQVTFSKRRRGLFKKSAELSVLTGAKIAVITFSKCDRIYRFGH---VDALIDKYLRKSPV--------L------------------EGS---GDPVESVPEEELEEYMAALSMLRENIGKKVAMGNDR-----TVDMVPAW----KPNL--
AT1G28450.1_AGL58	KGKQKINIKKIEKDEDRSVTLSKRLNAIYTMIIELSILCGVEVAFIGYSCSGKPYTFGSP-SFQAVVERFLNGEASSSLQAHKQIELCKRYNRLVEE---LKVDEK---VKPNDVKDHEKAKKMMEKYQELKEKLREEALRKRGH-----DENNNK------------
AT1G28460.1_AGL59	KGKQKINIKKIEKDEGRSVTFSKRLNGIYTKISELSILCGVEVAFIGYSCSGKPYTFGSP-SFQAVAERFLNGDASSSL-AHKQIELCKKYNRLVEE---LKVDEK---VKPNDVKDHEKAKKMMEKYQELYDKLCEQASRKRGH-----DENNNK------------
AT1G29962.1_AGL64	KGKQRINIKKIEKDEDRLVTLSKRRNGIYTKLSELSILCGAEVAFLGYSCSGKPYTFGSP-SFQAVAERFLNGEASSSLQAHQQIELCKVYNRLVEE---ITVEEK---LKPNDVKDREEVKKMMEKHQELYEKLCEEASRKRGH-----DENNNK------------
AT1G46408.1_AGL97	MGKRKIAIEKIQNKNPRAVSFSKRRKGLYSKASELCLLSDAEIAIIATPVSSAFYSFGHS-SVDNVVAAFLANQRP-----------------------------CDE---ELKS-NLEELREAMDSMSTMLRDLKKQTQTLIQNFDGF-DDQFDTVTTV--EADV--
AT1G47760.1_AGL102	MGRRKIEIKFIEDSIERKATFSRRRNGIFKKADELAKLCNVEIAVLVISPTNIPYTYGYP-CFNDVVERIQNPSASS-------LSLMKELEQIKEFQEDLRKKQR---N---VDLKLEDLVAFKAKLEAYQAGLKRKVEMEDLS--------------LKN----FR
AT1G48150.1_AGL74	MGKRKIEIEKRMTKQQRSVACSKRRPTLFSKAADLCLLSGANIAVFVTSPDENSYSFGYS-HASEIVDCYLNNKSP----P--KIE---K---------------------PLRD-DLSELRIIEDRLMRTKKHLMEKSHSVSQ-------DSSSQIAQ-NSEPGFFG
AT1G54760.1_AGL85	---------------DWSHYLSVEMES--TISNELSILCGAEVAFLGYSCSGKPYTFGSP-SFQAVAERFLNREA---LQAHQQIELCKVYNRMVEE---AKTEEK---VKPKEVEDHEEAKKIMEKCEGLYEKLCNEAARQRGD-----AENNNK------------
AT1G60880.1_AGL56	MGKTKIEIKKIINKPAKTVAFTKRREGLFRKASQLCLLSPTQIAILAAPMTSSFYSFGHS-SVDNVVSSLLYDHPP----------LNQD---------------R---G-KFDV-NVEELKEAVDAVSRMLNNVRCREEVLQEQTHEFE--ESGSAS-LD-----L-
AT1G60920.1_AGL55	MGKRKIEMKRIEDKNVRAVAFTKRKSGLFHKASELCLLSPTQIAILATPLSSSFYSFGHS-SVDHVVSSLLHNQHPS---------LNQD---------------R---G-QFDRLNVDELKEAVDAVSRMLNNVRLREEVLQDQITKL---ESASAS-LV-------
AT1G65360.1_AGL23	LGRRKVEIVKMTKESNLQVTFSKRKAGLFKKASEFCTLCDAKIAMIVFSPAGKVFSFGHP-NVDVLLDHFRGCVV---NNSYTKVMLNKSYTEVKAE---VEKEQN---KQSPLELNLSQSTCMIRVLKDLKKIVDEKIQLIHQT--------------YGS--GFFG
AT1G72350.1_AGL60	KGRQKIEIKEIMLETRRQVTFSKRRSGLFKKAAELSVLCGAQIGIITFSRCDRIYSFGN---VNSLIDKYLRKAPV--------L------------------RSP---GGAVESVPEEHMEEYKNALSVLRENLLTRYQMSGDR-----TVENLPAF----KLNLFM
AT2G24840.1_AGL61	IGRQKIPMVKIKKESHRQVTFSKRRAGLFKKASELCTLCGAEIGIIVFSPAKKPFSFGHP-SVESVLDRYVSRNNMS-QS--SPSELNMQLTHILSE---VEEEKK---GQPVEEMNMVQLQEMKYALEELRKTVVTNASFNEAK--------------GLDGP--FA
AT2G34440.1_AGL29	MGRRKIKMEMVQDMNTRQVTFSKRRTGLFKKASELATLCNAELGIVVFSPGGKPFSYGKP-NLDSVAERFMREYDD--SGGNYRLRLSERLDLLNQE---VEAEKR---GESIETLTLDELNEYKDRLQTVHGRIEGQNHLQASS--------------LR-------
AT3G04100.1_AGL57	KGKQKIEMKKVENYGDRMITFSKRKTGIFKKMNELVAMCDVEVAFLIFSQPKKPYTFAHP-SMKKVADRLKNPSRQEPDTAYKKLDLVKKMEALEEE---LAMDLK---LKPSEGLSAKELQQRYQAMLELRDNLCDNA-HRLGK-----DCGGSSSVR---------
AT3G66656.1_AGL91	MGRRKIKMEKVQDTNTKQVTFSKRRLGLFKKASELATLCNAEVGIVVFSPGNKPYSFGKP-NFDVIAERFKNEFEEEEETGNRAEKICKRLNSITEE---AEAEKH---GEPIEELTLEELKEFEAKIKKISCGIQSNSHMQASS--------------LN-------
AT4G36590.1_AGL40	KGRQKIEMKKMENESNLQVTFSKRRFGLFKKASELCTLSGAEILLIVFSPGGKVFSFGHP-SVQELIHRFSNPNHNS-NNTRPDIYLNNILTEVLAN---QEKEKK---RMDVKDLDMNETNQLISALQDVKKKLVRESQYSQVN-----VSQNY----GSSRRNYFG
AT5G04640.1_AGL99	MGKRKISIELIEKKDSRAVAFSKRSRGLYSKASDLCLLSDAQIAIIATPVSSSFYTFGHS-SVDNVVAAFLTNQRP-----------------------------REGLG-ELKS-DLEELRDAMDSMSKMLKDLKNQKQTFNENFDGF--DEFDYVSSVQNESDYLN
AT5G27130.1_AGL39	MGKRKIEIKKRETKEQRAVTCSKRRQTVFSKAADLCLISGANIAVFVTSPSDSSYSFGYS-SAYEIADCYLNRKPP----P--KVA---KL------------------G-PLHS-DLSELSIIEDRLQRMKKHVMEKSQLVSQ------VEDYSQIAQ-NNESGFFG
AT5G38620.1_AGL73	GKRKIAIETIQKRDSLRVTCTKRRKGLYSKASQLCLLSDAQIAILATPPSSSFYSFGHS-SVDAVVSAFLSGKRPV---S-----APKDNKETREDVGICL---RKNLG-ELRS-NPQEISEAIGSMWTLLSNLKADDQTLIQNLNDI---DQSSSSEIDQESDWLN
AT5G49420.1_AGL84	KGKRKIAIETIQKRDSLRVTCTKRREGLYSKASQLCLLSDAQIAILATPPSSSFYSFGHS-SVDAVVSAFLSGQRPV----------PKDNKETREDVGICL---RNNLG-ELRS-NPQEISEAIDSMRTLLRNLKADDQTLIQNLNEI---NQSSTSEIDQESDWLN
AT5G49490.1_AGL83	KGKRKIAIETIQKSDYLRVTCTKRREGLFSKASQLCLLSDAQIAILATPPTSSFYSFGHS-SVDAVVSSFLSGQRCV---P-----LQEDTKEMREDVAICL---RTNLG-ELKS-NPQEISDAINSMLTLLSNLKGEYETL------------SNTTEIPNEKEWI-
AT5G60440.1_AGL62	KGRQKIEMVKMKNESNLQVTFSKRRSGLFKKASELCTLCGAEVAIVVFSPGRKVFSFGHP-NVDSVIDRFINNNPLPPNNTRRNVDLNNHLTQVLSQ---LETEKK---YDPVEELALSQLEGFKGNLENLKKVVTVESRFFQAN--------------YGS--GIFG
AT1G59810.1_AGL50	MAPKKNKSDD-DLRRKKQSFFKQRFPGFKKKASELSVLCGNSVGFICYGPDSDL-VW--PQALHEIVAKFNALSDERR----NHCNPHHLKGLSREELRSQLLGRQILKGSS---VENSAISDHKLKIEPHLKDISED-HLIRSDKKLGS------------NLGL-G
[truncated: 689 more rows]

[truncated: 1 more sheets: function]
